# Supplementary material for: Identical anthropometric characteristics of impaired fasting glucose combined with impaired glucose tolerance and newly diagnosed type 2 diabetes: anthropometric indicators to predict hyperglycaemia in a community-based prospective cohort study in southwest China
Source: PubMed Central journal article supplement (PMC5942465; doi:10.1136/bmjopen-2017-019735), 2018-05-09
Supplement: bmjopen-2017-019735.draft_revisions.pdf [file bmjopen-2017-019735.draft_revisions.pdf]

# BMJ Open

BMJ Open is committed to open peer review. As part of this commitment we make the peer review history of every article we publish publicly available.

When an article is published we post the peer reviewers' comments and the authors' responses online. We also post the versions of the paper that were used during peer review. These are the versions that the peer review comments apply to.

The versions of the paper that follow are the versions that were submitted during the peer review process. They are not the versions of record or the final published versions. They should not be cited or distributed as the published version of this manuscript.

BMJ Open is an open access journal and the full, final, typeset and author-corrected version of record of the manuscript is available on our site with no access controls, subscription charges or pay-per-view fees (<http://bmjopen.bmj.com>).

If you have any questions on BMJ Open's open peer review process please email [info.bmjopen@bmj.com](mailto:info.bmjopen@bmj.com)

# BMJ Open

## Identical anthropometry characteristics of impaired fasting glucose combined with impaired glucose tolerance and newly-diagnosed type 2 diabetes: anthropometric indicators for hyperglycemia prediction in a community-based prospective cohort study

|                                 |                                                                                                                                                                                                                                                                                                                                                                                                                                                                                                                                                                                                                                                                                                                                                                                                            |
|---------------------------------|------------------------------------------------------------------------------------------------------------------------------------------------------------------------------------------------------------------------------------------------------------------------------------------------------------------------------------------------------------------------------------------------------------------------------------------------------------------------------------------------------------------------------------------------------------------------------------------------------------------------------------------------------------------------------------------------------------------------------------------------------------------------------------------------------------|
| Journal:                        | <i>BMJ Open</i>                                                                                                                                                                                                                                                                                                                                                                                                                                                                                                                                                                                                                                                                                                                                                                                            |
| Manuscript ID                   | bmjopen-2017-019735                                                                                                                                                                                                                                                                                                                                                                                                                                                                                                                                                                                                                                                                                                                                                                                        |
| Article Type:                   | Research                                                                                                                                                                                                                                                                                                                                                                                                                                                                                                                                                                                                                                                                                                                                                                                                   |
| Date Submitted by the Author:   | 23-Sep-2017                                                                                                                                                                                                                                                                                                                                                                                                                                                                                                                                                                                                                                                                                                                                                                                                |
| Complete List of Authors:       | Zhang, Fang; Sichuan University West China Hospital, Division of Endocrinology and Metabolism<br>Wan, Qin; Hospital affiliated to Southwest Medical University, Division of Endocrinology and Metabolism<br>Cao, Hongyi; The Fifth People's Hospital of Chengdu, Chengdu<br>Tang, Lizhi; Sichuan University West China Hospital, Division of Endocrinology and Metabolism<br>Li, Daigang; Chengdu Yinchao Community Hospital<br>Yan, Zhe; Sichuan University West China Hospital<br>Li, Jing; Sichuan University West China Hospital<br>Yang, Qiu; The Fifth People's Hospital of Chengdu<br>Lü, Qingguo; Sichuan University West China Hospital<br>Zhang, Yuwei; Sichuan University West China Hospital<br>Tong, Nanwei; Sichuan University West China Hospital, Division of Endocrinology and Metabolism |
| <b>Primary Subject Heading</b>: | Diabetes and endocrinology                                                                                                                                                                                                                                                                                                                                                                                                                                                                                                                                                                                                                                                                                                                                                                                 |
| Secondary Subject Heading:      | Epidemiology, Diabetes and endocrinology                                                                                                                                                                                                                                                                                                                                                                                                                                                                                                                                                                                                                                                                                                                                                                   |
| Keywords:                       | anthropometric index, impaired fasting glucose combined with impaired glucose tolerance, newly-diagnosed diabetes mellitus, pre-diabetes, waist-to-height ratio                                                                                                                                                                                                                                                                                                                                                                                                                                                                                                                                                                                                                                            |
|                                 |                                                                                                                                                                                                                                                                                                                                                                                                                                                                                                                                                                                                                                                                                                                                                                                                            |

SCHOLARONE™  
Manuscripts

## Title:

Identical anthropometry characteristics of impaired fasting glucose combined with impaired glucose tolerance and newly-diagnosed type 2 diabetes: anthropometric indicators for hyperglycemia prediction in a community-based prospective cohort study

## Authors:

Fang Zhang 1\*, Qin Wan 2\*, Hongyi Cao 3\*, Lizhi Tang 1, Daigang Li 4, Zhe Yan 1, Jing Li 1, Qiu Yang 3, QingguoLü 1, Yuwei Zhang 1, Nanwei Tong 1Δ

\*These authors contributed equally to this paper.

ΔCorresponding author

## Authors' affiliations:

1. Division of Endocrinology and Metabolism, West China Hospital, Sichuan University, Chengdu, Sichuan, China
2. Division of Endocrinology and Metabolism, Hospital affiliated to Southwest Medical University, Luzhou, Sichuan, China
3. Division of Endocrinology and Metabolism, The Fifth People's Hospital of Chengdu, Chengdu, Sichuan, China
4. Chengdu Yinchao Community Hospital, Chengdu, Sichuan, China

## Correspondences:

Address correspondence and reprint requests to Nanwei Tong, MD, Division of Endocrinology and Metabolism, West China Hospital, Sichuan University, 37 Guoxuexiang, Chengdu, Sichuan 610041, China. Telephone number: 00+86-18980601196. Fax number: 00+86-28-85423459. E-mail: [tongnw@scu.edu.cn](mailto:tongnw@scu.edu.cn).

## Abstract

**Objective:** To assess the anthropometry characteristics in euglycemic individuals who developed hyperglycemia subsequently and to evaluate the validity for pre-diabetes and diabetes identification by anthropometric indices in Southwest China.

**Design:** Community-based prospective cohort study.

**Participants and setting:** Pre-diabetes-free and diabetes-free residents (n=1885) at entry from six communities were enrolled in this study.

**Main outcome measures:** Pre-diabetes or diabetes incidence.

**Methods:** In this community-based prospective cohort study, the waist-to-height ratio (WHtR), body mass index (BMI), waist circumference (WC) and waist-to-hip ratio (WHR) of all participants were measured at each survey in Sichuan. The 75 g glucose oral glucose tolerance test was conducted both at baseline and follow-up surveys.

**Results:** During a median of 3.00 (2.92-4.17) years follow-up, the cumulative rates of incident isolated impaired fasting glucose (IFG), isolated impaired glucose tolerance (IGT), IFG combined with IGT (IFG+IGT) and newly-diagnosed diabetes mellitus (NDDM) were 8.44%, 18.14%, 8.06% and 13.79% among all the participants. WHtR, BMI, WC and WHR were significantly different among subjects who progressed to isolated IFG/IGT, IFG+IGT or NDDM subsequently ( $P < 0.05$ ). Of note, the anthropometry characteristics of IFG+IGT subjects were similar to that of NDDM population ( $P > 0.005$ ). All the anthropometric indices at entry were valuable to predict future pre-diabetes and NDDM incidences ( $P < 0.05$ ). The optimal cut-off points of the four measurements were obtained to predict hyperglycemia, with WHtR of the value around 0.52 performing best to identify isolated IFG/IGT, IFG+IGT and NDDM.

**Conclusions:** Anthropometric measures, especially WHtR, could predict hyperglycemia incidences in advance for 3 years. Differed from isolated IFG/IGT, the individuals who developed IFG+IGT had identical anthropometric profiles to those who transitioned to NDDM.

**Key words:** anthropometric index, impaired fasting glucose combined with impaired glucose tolerance, newly-diagnosed diabetes mellitus, pre-diabetes, waist-to-height ratio

1  
2  
3 Strengths and limitations of this study

4 1.This study not only illustrated and compared the anthropometric characteristics of  
5 participants who subsequently progressed to diverse hyperglycemic conditions, but also  
6 revealed the variation tendencies of waist-to-height ratio (WHtR), body mass index (BMI),  
7 waist circumference (WC) and waist-to-hip ratio (WHR) in the natural transition from normal  
8 glucose tolerance (NGT) to pre-diabetes, and to overt newly-diagnosed diabetes mellitus  
9 (NDDM) in advance for 3 years.  
10

11  
12  
13  
14 2. WHtR performed best to identify future hyperglycemia incidence.  
15

16 3. The follow-up duration of a median 3.00 years was relatively short.  
17

18 4. The overall re-visiting ratio was low (41.91%).  
19

20  
21 5. The sample size was limited to obtain the anthropometric cut-off values in each  
22 hyperglycemic state by gender.  
23  
24  
25  
26  
27  
28  
29  
30  
31  
32  
33  
34  
35  
36  
37  
38  
39  
40  
41  
42  
43  
44  
45  
46  
47  
48  
49  
50  
51  
52  
53  
54  
55  
56  
57  
58  
59  
60

## Introduction

With the rapidly growing diabetes occurrences, it is now reaching epidemic proportions in China. The overall prevalence of diabetes and pre-diabetes were estimated to be 11.6% and 50.1% in the Chinese adult population in 2010 [1]. In 2007-2008, another national cross-sectional study in China indicated that the prevalence of isolated impaired fasting glucose (IFG), isolated impaired glucose tolerance (IGT), and IFG combined with IGT (IFG+IGT) were 3.2%, 11.0% and 1.9% in men, while 2.2%, 10.9% and 1.7% among women [2]. Isolated IFG, isolated IGT and IFG+IGT were three different status of pre-diabetes, reflecting the natural transition from normoglycemia to type 2 diabetes (T2D). Approximately 75-80% diabetes patients develop cardiovascular disease (CVD) ultimately and pre-diabetes is also verified to be at increased risk of heart attacks and strokes [3-5]. It was estimated that from 2005 to 2015, diabetes and its relative CVD would cause a total of US\$ 557.7 billion loss in China [6].

Overall and central adiposities are closely linked to hyperglycemia. Body mass index (BMI) is a measurement correlated with overall fat, while waist circumference (WC), waist-to-height ratio (WHtR) and waist-to-hip ratio (WHR) are three central obesity indicators. The four anthropometric indices are globally used to assess the risk of having current or future diabetes [7-9].

Actions to address pre-diabetes are critical for preventing diabetes. Early recognition and prompt intervention could release the stress from the whole society. Anthropometry is an affordable and practical screening tool for hyperglycemia both in advanced and impoverished areas of China. In this community-based prospective cohort study, we aimed to examine whether the baseline anthropometric indices could predict the future pre-diabetes and diabetes incidences with optimal cut-off values. The baseline anthropometric characteristics of euglycemic subjects, who developed isolated IFG, isolated IGT, IFG+IGT and newly-diagnosed diabetes mellitus (NDDM) during follow-up, were displayed. Additionally, the potential similarity and distinction between any two hyperglycemic disorders were detected.

## Study design and methods

### *Study population*

The present study included two surveys conducted in Luzhou City and Wenjiang area of Chengdu City, respectively. The Luzhou survey was one part of the REACTION research, which is a multicenter prospective observational study containing 25 communities in mainland China [10, 11]. A total of 10007 regular residents, aged of 40-89 years, were randomly recruited to participate in our investigation from five communities of Luzhou in 2011. Subjects with history of diabetes, incident diabetes or pre-diabetes verified by oral glucose tolerance test (OGTT), missing values of any measurement, or of other exclusive conditions (see below) were excluded. There were only 3800 individuals with euglycemia remained as our baseline population. Among them, only 1354 participants revisited in 2014 and had completed data. Furthermore, in 2016, 228 residents from baseline normoglycemia population but not surveyed in 2014 were followed up. Therefore, a total of 1582 subjects

1  
2  
3 from Luzhou screening were available for current work.  
4

5  
6 In the Wenjiang survey, a cohort of 1104 participants aged 40-75 years were randomly  
7 recruited from Yinchao community in 2011. According to the same inclusion criteria, 698  
8 euglycemic individuals were considered as the baseline population. Among them, 303  
9 subjects were followed up in 2015 and received completed measurements. Thus, from Luzhou  
10 and Wenjiang, a total of 1885 participants were included in our study.  
11

12  
13 All the included populations are of the Han nationality in China. The flow path of our study  
14 design is displayed in Supplemental Figure 1. The other exclusion criteria were infection,  
15 pregnancy, malignant tumor, acute cardiovascular accidents, serious trauma, liver or renal  
16 dysfunction, and long history of glucocorticoids use. The research was conducted in  
17 accordance with the principles of the Declaration of Helsinki II. All protocols used in this  
18 work were approved either by the Medical Ethics Committee of Hospital affiliated to  
19 Southwest Medical University in Luzhou, or by the Committee on Human Research at the  
20 Fifth People's Hospital of Chengdu in Wenjiang. Each participant provided written informed  
21 consent.  
22  
23

#### 24 25 *Diagnosis of diabetes and pre-diabetes*

26 The hyperglycemic disorder definitions are in accordance with American Diabetes  
27 Association recommendation by OGTT in 2011 [12]. Normal glycemia tolerance (NGT) is  
28 defined as fasting plasma glucose (FPG) < 5.6mmol/L and 2-hour plasma glucose (2hPG) <  
29 7.8 mmol/L. Isolated IFG means  $5.6 \text{ mmol/L} \leq \text{FPG} < 7.0 \text{ mmol/L}$  and  $2\text{hPG} < 7.8 \text{ mmol/L}$ ,  
30 while isolated IGT means  $\text{FPG} < 5.6\text{mmol/L}$  and  $7.8 \text{ mmol/L} \leq 2\text{hPG} < 11.1 \text{ mmol/L}$ .  
31 IFG+IGT equals to  $5.6 \text{ mmol/L} \leq \text{FPG} < 7.0 \text{ mmol/L}$  and  $7.8 \text{ mmol/L} \leq 2\text{hPG} < 11.1 \text{ mmol/L}$ .  
32 Diabetes is defined as  $\text{FPG} \geq 7.0 \text{ mmol/L}$  and/or  $2\text{hPG} \geq 11.1 \text{ mmol/L}$ .  
33  
34  
35

#### 36 37 *Anthropometric measurements*

38 Anthropometric measurements including body weight, height, WC and hip circumference  
39 were recorded by trained examiners. All participants were measured when wearing light  
40 clothing without foot-wearing after 10-12 hours overnight fasting in the morning.  
41 Measurements were conducted by using calibrated weighing scale, standard steel strip  
42 stadiometer and tape measure. The results were recorded to the nearest 0.1 kg and 0.1 cm.  
43 WC was obtained at the midway between the costal border and iliac crest at the end of  
44 exhalation. Hip circumference was taken around the widest portion of the buttocks. BMI was  
45 calculated as body weight (in kg) divided by squared height (in m<sup>2</sup>), WHtR as WC (in cm)  
46 divided by height (in cm), and WHR as WC (in cm) divided by hip circumference (in cm).  
47  
48

#### 49 50 *Lifestyle variables and biological evaluation*

51 Trained investigators collected lifestyle information on demographic characteristics, current  
52 smoking status, physical activity situation, medications, personal and family disease histories  
53 through a standard questionnaire and face-to-face interviews. Blood pressure (BP) was  
54 measured three times for each participant by an electronic sphygmomanometer (OMRON,  
55 HEM-7220, Liaoning, China) with 5 min intervals after at least 10 min rest, whose average  
56  
57  
58  
59

value was taken.

All participants accepted an OGTT screening. After 10-12 hours overnight fasting, venous blood specimens were drawn both before and 2 hours after they drank 300 ml water containing 75 g anhydrous glucose within 5 min. FPG and 2hPG concentrations were measured within 24 hours by hexokinase method (Hitachi 7600 automatic biochemical analyzer, Hitachi Ltd., Tokyo, Japan). Fasting total cholesterol (TC), triglyceride (TG), high-density lipoprotein cholesterol (HDL-c) and low-density lipoprotein cholesterol (LDL-c) were also obtained within 24 hours by oxidase colorimetric method (same Hitachi 7600 analyzer as above). HbA1c was measured via the high performance liquid chromatography method (VARIANT™ II TURBO Hemoglobin Testing System, Bio-Rad Laboratories, CA, USA). These samples were stored at -20 °C till analyzed, which were of 3-week storage per batch.

### *Statistical analysis*

Data analyses were carried out by SPSS software version 16.0 (SPSS, Chicago, IL, USA) and MedCalc software version 15.2.2 (MedCalc software, Ostend, Belgium). All data were expressed as means  $\pm$  SD or median (interquartile range) or frequency (%), as appropriate. One-way ANOVA analysis was used for parametric materials, while rank sum test was applied for nonparametric variables. Chi-square test was assessed for constituent ratio comparison. All tests performed were two-sided. Among multiple groups (groups  $\geq$  3) comparison, the overall P value less than 0.05 was considered as significant. Furthermore, the Bonferroni correction and chi-square segmentation were used for multiple comparison adjustments. The P value within two specific subgroups comparison was significant when less than 0.005. For BMI, WHtR, WC and WHR, the receiver operating characteristic (ROC) curve analyses were applied for comparing their ability to predict incident pre-diabetes and NDDM. The nonparametric approach described by DeLong et al. was used to compare the areas under correlated ROC curves [13]. The predictive cut-off values for hyperglycemia were calculated. COX proportional hazards regression was used to evaluate the association between anthropometric indices and hyperglycemia incidences. Time axis was follow-up until (pre-)diabetes incidence or follow-up termination. Hazard ratio (HR) and 95% confidence interval (CI) were calculated.

## Results

### *Characteristics of all subjects at baseline*

A total of 1885 euglycemic subjects (649 males and 1236 females), with median age of 56.00 (48.00-61.00) years old, were recruited in our study in 2011. After a median follow-up of 3.00 (2.92-4.17) years, 159 individuals of them transitioned to isolated IFG, 342 to isolated IGT, 152 to IFG+IGT, 260 to NDDM, while the rest 972 participants still remained normoglycemia. The incidence rates of pre-diabetes and NDDM were calculated to be 104.9 per 1000 person-years and 41.8 per 1000 person-years. Characteristics of all subjects at baseline in Luzhou and Wenjiang are illustrated in Supplemental Table 1. The baseline general measurements of participants, who developed isolated IFG, isolated IGT, IFG+IGT and NDDM in future, are shown in Table 1.



1  
2  
3  
4 *Anthropometric measures of subjects who subsequently developed diverse hyperglycemic*  
5 *disorders at follow-up and baseline*

6 During the follow-up survey, it was found that the WHtR in NGT group was lower than that  
7 in isolated IGT, IFG+IGT and NDDM groups ( $P < 0.005$ ) (Table 2), while it was lower in  
8 isolated IFG and isolated IGT populations than that in IFG+IGT and NDDM individuals ( $P <$   
9  $0.005$ ). Though the p values were 0.009 and 0.006 of BMI in isolated IFG vs. IFG+IGT and  
10 isolated IGT vs. IFG+IGT, 0.005 of WHR in isolated IFG/IGT vs. IFG+IGT, respectively, it  
11 displayed a trend of the difference between isolated IFG/IGT and IFG+IGT. Conclusively, the  
12 values of BMI, WC and WHR in the five glucose metabolic statuses were presented in the  
13 variation tendency of NGT < isolated IFG, isolated IGT < IFG+IGT, NDDM. Unlike isolated  
14 IFG and isolated IGT, the anthropometric characteristics in IFG+IGT were similar to that in  
15 NDDM at follow-up ( $P > 0.005$ ).  
16  
17  
18  
19

20 To assess whether the anthropometry had already changed before hyperglycemia presenting,  
21 we concentrated in its alteration at baseline when all subjects were still of euglycemia. Except  
22 for WC, the baseline WHtR, BMI and WHR were substantially disparate among the five  
23 glucose metabolic groups ( $P < 0.05$ ) (Table 2). The WHtR values of IFG+IGT and NDDM  
24 groups were higher than that of NGT and isolated IFG groups ( $P < 0.005$ ), while isolated IGT  
25 populations had smaller WHtR than NDDM patients ( $P < 0.005$ ). The BMI index of NGT  
26 group was lower than that of isolated IGT, IFG+IGT and NDDM groups ( $P < 0.005$ ), while  
27 isolated IFG people had lower BMI than NDDM subjects ( $P < 0.005$ ). Additionally, NGT  
28 individuals were of thinner WHR than NDDM patients ( $P < 0.005$ ). Consistent findings as  
29 above at follow-up, it is worthy to note that there was no significant difference of WHtR, BMI  
30 or WHR between subsequent IFG+IGT and NDDM at baseline ( $P > 0.005$ ).  
31  
32  
33  
34

35 *Predictive values of baseline anthropometric indices to identify future pre-diabetes and*  
36 *NDDM incidences*

37 For isolated IFG prediction, baseline WHtR, WC and WHR were of significant areas under  
38 the curves (AUCs) ( $P < 0.05$ ) (Table 3). WHtR and WC to predict isolated IFG yielded higher  
39 value than BMI ( $P < 0.05$ ) (Figure 1A). In isolated IGT population, the AUCs of all the four  
40 indices were significant ( $P = 0.000$ ). WHtR received higher predictive value than BMI, WC  
41 and WHR ( $P < 0.05$ ), while WC was superior to WHR for predicting isolated IGT ( $P < 0.05$ )  
42 (Figure 1B). For IFG+IGT incidence, the four measurements were valuable predictors ( $P =$   
43  $0.000$ ), among which WHtR and WC ranked higher than WHR ( $P < 0.05$ ) (Figure 1C). For  
44 NDDM identification, the four indices were substantially significant ( $P < 0.05$ ), where WHtR  
45 was the best predictor ( $P < 0.05$ ) (Figure 1D). Moreover, the optimal cut-off points for  
46 predicting hyperglycemia of the four indices (WC and WHR cut-off values for men and  
47 women respectively) were obtained.  
48  
49  
50  
51

52 *Multivariable analysis of baseline anthropometric indices in relation to risk of subsequent*  
53 *pre-diabetes and NDDM*

54 According to COX proportional hazards regression, potential risk factor for developing  
55 isolated IFG was increased WC at baseline ( $P < 0.05$ ) (Table 4). Potential risk factors for  
56  
57  
58  
59  
60

transiting to isolated IGT were incremental WHtR, BMI and WC at entry ( $P < 0.05$ ). For both IFG+IGT and NDDM incidences, increased baseline WHtR, BMI, WC and WHR were the risk factors ( $P < 0.05$ ).

## Discussion

From this community-based prospective cohort study, we found that: (1) When patients diagnosed overt pre-diabetes and NDDM, the values of WHtR, BMI, WC and WHR were presented as the tendency of NGT < isolated IFG, isolated IGT < IFG+IGT, NDDM. (2) Among the diverse hyperglycemic disorders, noteworthy is that unlike isolated IFG and isolated IGT, no significant difference of baseline WHtR or BMI was found between IFG+IGT and NDDM subjects. (3) WHtR, BMI, WC and WHR could predict subsequent incidences of pre-diabetes and diabetes in advance for 3 years. The greater baseline anthropometric values people were of, the higher risk for developing hyperglycemia they were at. (4) Optimal cut-off values of the four anthropometric measures for identifying pre-diabetes and diabetes were obtained, with WHtR performing best to detect hyperglycemia among all indices.

An Iranian research including 5879 participants who were initially free of hyperglycemia, after 9-year follow-up, 1755 subjects developed pre-diabetes, where isolated IFG had the highest incidence rate among all pre-diabetes phenotypes. They found that among women, compared with BMI, hip and wrist circumferences, WHtR was the only significant anthropometric predictor of pre-diabetes [14]. Lyssenko et al. reported a study of 1190 NGT subjects at baseline in Finland. During a median follow-up of 6 years, 199 progressed to pre-diabetes. Compared with those who remained NGT, the pre-diabetes had substantially higher BMI and WHtR at entry [15]. An increasing number of scholars have realized that the anthropometry is tightly correlated with pre-diabetes incidence, though most of their evidences based on cross-sectional data [16-19].

After reviewing these literatures, we found some points in common: (1) Referred to pre-diabetes, the majority of these studies only involved one or two pre-diabetic phenotypes. Some even mixed them as a whole, generally called “pre-diabetes”. (2) Rare investigators described the respective anthropometry characteristics of various hyperglycemic disorders in their manuscript. We only read one report displaying the anthropometric information in details of all pre-diabetic phenotypes and NDDM together [20]. It was observed that WHtR, BMI, WC and WHR were substantially distinct among NGT, isolated IFG, isolated IGT, IFG+IGT and NDDM subjects. But none of the anthropometric indices were compared within any two hyperglycemic groups. Therefore, the variation tendency of anthropometry in pre-diabetes and NDDM could not be illustrated. Moreover, this study was based on cross-sectional design. To our knowledge, the present work is the first prospective cohort study that not only illustrated the anthropometric characteristics of participants who progressed to diverse hyperglycemic conditions, but also revealed the variation tendencies of WHtR, BMI, WC and WHR in the natural transition from NGT to pre-diabetes, and to overt NDDM.

Isolated IFG and isolated IGT are of heterogeneous pathogenesis, while IFG+IGT manifests

1  
2  
3 both hepatic and peripheral insulin resistances. Pre-diabetes, as an intermediate  
4 hyperglycemia, is a high-risk state for diabetes development. Among the three phenotypes of  
5 pre-diabetes, IFG+IGT approximately doubled the rate of diabetes transition compared with  
6 subjects with just one of them [21]. In our previous work, it was found that during the  
7 progression from NGT to overt T2D, differentiated from isolated IFG and isolated IGT,  
8 several biomarkers in IFG+IGT individuals had already presented the similar alteration to  
9 those in NDDM population [22-24]. Consistently, in the present study, we observed that  
10 participants who developed hyperglycemia in future had higher WHtR, BMI and WHR at  
11 entry than those who remained NGT. Among the three pre-diabetic statuses, IFG+IGT  
12 subjects were of the highest anthropometric profile at baseline, which manifested no  
13 significant difference from that in NDDM group. These findings may imply that though  
14 IFG+IGT is a subtype of pre-diabetes, some disorders of its pathophysiology have already  
15 deteriorated to the same extent as NDDM does. Pre-diabetes is a reversible condition.  
16 Consequently, prompt intervention is needed to avoid or delay its progression, especially for  
17 the patients with IFG+IGT.  
18  
19  
20  
21

22  
23 A prospective study conducted in Pima Indians population found that BMI and WHtR were  
24 the best predictors of diabetes in men, while BMI, WHtR, WC and waist-to-thigh ratio were  
25 the best predictors in women [25]. Chei et al. published a cohort study of 5617 Japanese  
26 participants. Only for women, the significant predictors for T2D were BMI, WC and WHtR  
27 [26]. In a multi-ethnic cohort of 1073 non-Hispanic white, Hispanic and African American  
28 non-diabetic individuals, their baseline anthropometric information showed that in the  
29 non-Hispanic white and Hispanic populations, BMI was most predictive of diabetes, whereas  
30 all central obesity indicators ranked higher than overall adiposity measures in African  
31 American population [27]. These inconclusive evidences indicated that the validities of those  
32 anthropometry measurements for diabetes identification are variable in different ethnicities,  
33 genders and regions. Based on our ROC analysis, WHtR showed the highest value for  
34 identifying pre-diabetes and overt NDDM, followed by WC, while BMI and WHR were  
35 relatively weak predictors. Results from two Western Pacific studies were consistent with our  
36 findings [28, 29].  
37  
38  
39  
40

41 A systematic review proposed that the boundary values of WHtR for diabetes prediction in  
42 men and women were 0.52 and 0.53, respectively [30]. In a Chinese community-based  
43 prospective cohort study, the optimal cut-offs for diabetes of WHtR, and BMI were 0.51 and  
44 24 for men, while 0.55 and 25 for women [29]. These predictive cut-off values were similar to  
45 the data in our study.  
46  
47

48 Several limitations in our work should be addressed. First, the follow-up duration of a median  
49 3.00 years was relatively short. But we were shocked by the cumulative incidence rates of  
50 pre-diabetes and NDDM at 34.64% and 13.79%. The fast-paced life and sedentary lifestyle  
51 may contribute mostly to the rapidly growing hyperglycemia. Second, the overall re-visiting  
52 ratio was low (41.91%). Phone interview once a year at least and prompt examination  
53 propagandizing for visitors may reduce the lost rate. Third, the sample size was limited. On  
54 account of this weakness, it was invalid to obtain the anthropometric cut-off values in each  
55  
56  
57  
58  
59  
60

1  
2  
3 hyperglycemic state by gender. Further studies are needed to acquire specific cut-off points  
4 for screening pre-diabetes and NDDM in men and women respectively, especially for the WC  
5 and WHR indicators.  
6

7  
8 In summary, WHtR, BMI, WC and WHR are all predictable to identify pre-diabetes and  
9 NDDM incidences in advance for 3 years. Individuals with increased WHtR, BMI, WC and  
10 WHR at entry are at higher risk for developing pre-diabetes and T2D. The optimal cut-off  
11 points of all the anthropometric measurements to predict hyperglycemia were obtained, with  
12 WHtR of the value around 0.52 performing best to identify isolated IFG/IGT, IFG+IGT and  
13 NDDM. WHtR and BMI at baseline could illustrate the gradually increased tendency in the  
14 natural progression from euglycemia to pre-diabetes, and to overt T2D subsequently. Of note,  
15 distinguished from isolated IFG and isolated IGT, the anthropometry characteristics of  
16 IFG+IGT subjects were similar to that of NDDM population both at baseline and follow-up.  
17  
18  
19  
20  
21  
22  
23

#### 24 Contributorship statement

25 All the authors engaged in the surveys. FZ and NT designed this article. QW, HC, DL and QY  
26 acquired and collected data. JL, ZY, QL and YZ organized all the data. FZ, QW and HC  
27 analyzed all the information. FZ and LT drafted the manuscript. FZ and NT revised the article  
28 critically. All the authors read and approved the final manuscript.  
29  
30  
31

#### 32 Acknowledgements

33 All the authors appreciated the staffs from primary health care centers for materials  
34 supplement and participant organization.  
35  
36  
37

#### 38 Competing interests

39 All the authors declared that there were no competing interests among them.  
40  
41  
42

#### 43 Fundings

44 The surveys in Luzhou were supported by the grants from the National Clinical Research  
45 Center for Metabolic Diseases (2013BAI09B13), the National Key New Drug Creation and  
46 Manufacturing Program of Ministry of Science and Technology (2012ZX09303006-001). The  
47 screenings in Wenjiang were supported by the National Key Technology R&D Program of  
48 China (Grant No. 2009BAI80B01 and No. 2009BAI80B02) and Sichuan Provincial Science  
49 and Technology Foundation (Grant No. 150022).  
50  
51  
52  
53

#### 54 Data sharing statement

55 A supplementary profile will be available online which contains comprehensive figure  
56  
57  
58  
59  
60

and table of used input data. Inquiries about additional unpublished data could be contacted with the corresponding author.

## References

1. Xu Y, Wang L, He J, Bi Y, Li M, Wang T, Wang L, Jiang Y, Dai M, Lu J, Xu M, Li Y, Hu N, Li J, Mi S, Chen CS, Li G, Mu Y, Zhao J, Kong L, Chen J, Lai S, Wang W, Zhao W, Ning G; 2010 China Noncommunicable Disease Surveillance Group. Prevalence and Control of Diabetes in Chinese Adults. *JAMA*. 2013; 310 (9): 948-958.
2. Yang W, Lu J, Weng J, Jia W, Ji L, Xiao J, Shan Z, Liu J, Tian H, Ji Q, Zhu D, Ge J, Lin L, Chen L, Guo X, Zhao Z, Li Q, Zhou Z, Shan G, He J; China National Diabetes and Metabolic Disorders Study Group. Prevalence of Diabetes among Men and Women in China. *N Engl J Med*. 2010; 362: 1090-101.
3. Rydén L, Grant PJ, Anker SD, Berne C, Cosentino F, Danchin N, Deaton C, Escaned J, Hammes HP, Huikuri H, Marre M, Marx N, Mellbin L, Ostergren J, Patrono C, Seferovic P, Uva MS, Taskinen MR, Tendera M, Tuomilehto J, Valensi P, Zamorano JL; ESC Committee for Practice Guidelines (CPG), Zamorano JL, Achenbach S, Baumgartner H, Bax JJ, Bueno H, Dean V, Deaton C, Erol C, Fagard R, Ferrari R, Hasdai D, Hoes AW, Kirchhof P, Knuuti J, Kolh P, Lancellotti P, Linhart A, Nihoyannopoulos P, Piepoli MF, Ponikowski P, Sirnes PA, Tamargo JL, Tendera M, Torbicki A, Wijns W, Windecker S; Document Reviewers, De Backer G, Sirnes PA, Ezquerro EA, Avogaro A, Badimon L, Baranova E, Baumgartner H, Betteridge J, Ceriello A, Fagard R, Funck-Brentano C, Gulba DC, Hasdai D, Hoes AW, Kjekshus JK, Knuuti J, Kolh P, Lev E, Mueller C, Neyses L, Nilsson PM, Perk J, Ponikowski P, Reiner Z, Sattar N, Schächinger V, Scheen A, Schirmer H, Strömberg A, Sudzhaeva S, Tamargo JL, Viigimaa M, Vlachopoulos C, Xuereb RG. ESC Guidelines on diabetes, pre-diabetes, and cardiovascular diseases developed in collaboration with the EASD. *European Heart Journal*. 2013; 34: 3035–3087.
4. Tanne D, Koren-Morag N, Goldbourt U. Fasting plasma glucose and risk of incident ischemic stroke or transient ischemic attacks: a prospective cohort study. *Stroke*. 2004; 35:2351-5.
5. Norhammar A, Tenerz A, Nilsson G, Hamsten A, Efendic S, Rydén L, Malmberg K. Glucose metabolism in patients with acute myocardial infarction and no previous diagnosis of diabetes mellitus: a prospective study. *Lancet*. 2002; 359: 2140-4.
6. Chinese Diabetes Society. China Guideline for Type 2 Diabetes. *Chinese Diabetes Society*. 2010. (Chinese)
7. Chen L, Magliano DJ, Balkau B, Colagiuri S, Zimmet PZ, Tonkin AM, Mitchell P, Phillips PJ, Shaw JE. AUSDRISK: an Australian type 2 diabetes risk assessment tool based on demographic, lifestyle and simple anthropometric measures. *Medical Journal of Australia*. 2010;192:(4)197–202.
8. Lindstrom J, Tuomilehto J. The diabetes risk score: a practical tool to predict type 2 diabetes risk. *Diabetes Care*. 2003;26:(3)725–731.

- 1
  - 2
  - 3
  - 4
  - 5
  - 6
  - 7
  - 8
  - 9
  - 10
  - 11
  - 12
  - 13
  - 14
  - 15
  - 16
  - 17
  - 18
  - 19
  - 20
  - 21
  - 22
  - 23
  - 24
  - 25
  - 26
  - 27
  - 28
  - 29
  - 30
  - 31
  - 32
  - 33
  - 34
  - 35
  - 36
  - 37
  - 38
  - 39
  - 40
  - 41
  - 42
  - 43
  - 44
  - 45
  - 46
  - 47
  - 48
  - 49
  - 50
  - 51
  - 52
  - 53
  - 54
  - 55
  - 56
  - 57
  - 58
  - 59
  - 60
9. Mohan V, Sandeep S, Deepa M, Gokulakrishnan K, Datta M, Deepa R. A diabetes risk score helps identify metabolic syndrome and cardiovascular risk in Indians – the Chennai Urban Rural Epidemiology Study (CURES-38). *Diabetes, Obesity and Metabolism*. 2007;9:(3)337–343.
10. Lu J, Bi Y, Wang T, Wang W, Mu Y, Zhao J, Liu C, Chen L, Shi L, Li Q, Wan Q, Wu S, Qin G, Yang T, Yan L, Liu Y, Wang G, Luo Z, Tang X, Chen G, Huo Y, Gao Z, Su Q, Ye Z, Wang Y, Deng H, Yu X, Shen F, Chen L, Zhao L, Dai M, Xu M, Xu Y, Chen Y, Lai S, Ning G. The relationship between insulin-sensitive obesity and cardiovascular diseases in a Chinese population: Results of the REACTION study. *International Journal of Cardiology*. 2014; 172: 388–394.
11. Bi Y, Lu J, Wang W, Mu Y, Zhao J, Liu C, Chen L, Shi L, Li Q, Wan Q, Wu S, Yang T, Yan L, Liu Y, Wang G, Luo Z, Tang X, Chen G, Huo Y, Gao Z, Su Q, Ye Z, Wang Y, Qin G, Deng H, Yu X, Shen F, Chen L, Zhao L, Zhang J, Sun J, Dai M, Xu M, Xu Y, Chen Y, Lai S, Bloomgarden ZT, Li D, Ning G. Cohort profile: Risk evaluation of cancers in Chinese diabetic individuals: A longitudinal (REACTION) study. *J Diabetes*. 2014; 6 (2): 147–57.
12. American Diabetes Association. Standards of medical care in diabetes–2010. *Diabetes Care*. 2011; 33 (Suppl. 1): S11–61.
13. DeLong ER, DeLong DM, Clarke-Pearson DL. Comparing the areas under two or more correlated receiver operating characteristic curves: a nonparametric approach. *Biometrics*. 1988; 44 (3):837-45.
14. Hadaegh F, Derakhshan A, Zafari N, Khalili D, Mirbolouk M, Saadat N, Azizi F. Pre-diabetes tsunami: incidence rates and risk factors of pre-diabetes and its different phenotypes over 9 years of follow-up. *Diabet Med*. 2015 Nov 25. doi: 10.1111/dme.13034.
15. Lyssenko V, Almgren P, Anevski D, Perfekt R, Lahti K, Nissén M, Isomaa B, Forsen B, Homström N, Saloranta C, Taskinen MR, Groop L, Tuomi T, Botnia study group. Predictors of and longitudinal changes in insulin sensitivity and secretion preceding onset of type 2 diabetes. *Diabetes*. 2005;54(1):166-74.
16. Xu Z, Qi X, Dahl AK, Xu W. Waist-to-height ratio is the best indicator for undiagnosed type 2 diabetes. *Diabet Med*. 2013;30(6):e201-7.
17. Hu D, Xie J, Fu P, Zhou J, Yu D, Whelton PK, He J, Gu D. Central rather than overall obesity is related to diabetes in the Chinese population: the InterASIA study. *Obesity (Silver Spring)*. 2007 Nov;15(11):2809-16.
18. Jung SH, Ha KH, Kim DJ. Visceral fat mass has stronger associations with diabetes and prediabetes than other anthropometric obesity indicators among Korean adults. *Yonsei Med J*. 2016 May;57(3):674-80.
19. Hayashi T, Boyko EJ, Leonetti DL, McNeely MJ, Newell-Morris L, Kahn SE, Fujimoto WY. Visceral adiposity and the risk of impaired glucose tolerance: a prospective study among Japanese Americans. *Diabetes Care*. 2003;26(3):650-5.
20. Alperet DJ, Lim WY, Mok-Kwee Heng D, Ma S, van Dam RM. Optimal anthropometric measures and thresholds to identify undiagnosed type 2 diabetes in three major Asian

- 1  
2  
3 ethnic groups. *Obesity (Silver Spring)*. 2016 Oct;24(10):2185-93.
- 4  
5 21. Nathan DM, Davidson MB, DeFronzo RA, Heine RJ, Henry RR, Pratley R, Zinman  
6 B, American Diabetes Association. Impaired fasting glucose and impaired glucose  
7 tolerance: implications for care. *Diabetes Care*. 2007 Mar;30(3):753-9.
- 8  
9 22. Huang L, Tong Y, Zhang F, Yang Q, Li D, Xie S, Li Y, Cao H, Tang L, Zhang X, Tong  
10 N. Increased acyl ghrelin but decreased total ghrelin and unacyl ghrelin in Chinese Han  
11 people with impaired fasting glucose combined with impaired glucose tolerance.  
12 *Peptides*. 2014 Oct;60:86-94.
- 13  
14 23. Lü Q, Tong N, Liu Y, Li N, Tang X, Zhao J, Cao H, Li D, Gou L, Zhang Y, Wan J, Jiang L.  
15 Community-based population data indicates the significant alterations of insulinresistance  
16 , chronic inflammation and urine ACR in IFG combined IGT group amongprediabetic pop  
17 ulation. *Diabetes Res Clin Pract*. 2009 Jun;84(3):319-24.
- 18  
19 24. Zhang F, Tang X, Cao H, Lü Q, Li N, Liu Y, Zhang X, Zhang Y, Cao M, Wan J, An  
20 Z, Tong N. Impaired secretion of total glucagon-like peptide-1 in people with impaired  
21 fasting glucose combined impaired glucose tolerance. *Int J Med Sci*. 2012;9(7):574-81.
- 22  
23 25. Tulloch-Reid MK, Williams DE, Looker HC, Hanson RL, Knowler WC.  
24 Do measures of body fat distribution provide information on the risk of type 2 diabetes in  
25 addition to measures of general obesity? Comparison of anthropometric predictors of  
26 type 2 diabetes in Pima Indians. *Diabetes Care*. 2003 Sep;26(9):2556-61.
- 27  
28 26. Chei CL, Iso H, Yamagishi K, Tanigawa T, Cui R, Imano H, Kiyama M, Kitamura A, Sato  
29 S, Shimamoto T. Body fat distribution and the risk of hypertension and diabetes among  
30 Japanese men and women. *Hypertens Res*. 2008 May;31(5):851-7.
- 31  
32 27. MacKay MF, Haffner SM, Wagenknecht LE, D'Agostino RB Jr, Hanley AJ.  
33 Prediction of type 2 diabetes using alternate anthropometric measures in a multi-ethnic  
34 cohort: the insulin resistance atherosclerosis study. *Diabetes Care*. 2009  
35 May;32(5):956-8.
- 36  
37 28. Son YJ, Kim J, Park HJ, Park SE, Park CY, Lee WY, Oh KW, Park SW, Rhee EJ.  
38 Association of Waist-Height Ratio with Diabetes Risk: A 4-Year Longitudinal  
39 Retrospective Study. *Endocrinol Metab (Seoul)*. 2016 Mar;31(1):127-33.
- 40  
41 29. Xu F, Wang YF, Lu L, Liang Y, Wang Z, Hong X, Li J. Comparison of anthropometric  
42 indices of obesity in predicting subsequent risk of hyperglycemia among Chinese men  
43 and women in Mainland China. *Asia Pac J Clin Nutr*. 2010;19(4):586-93.
- 44  
45 30. Browning LM, Hsieh SD, Ashwell M. A systematic review of waist-to-height ratio as a  
46 screening tool for the prediction of cardiovascular disease and diabetes: 0.5 could be a  
47 suitable global boundary value. *Nutrition Research Reviews*. 2010; 23: 247–269.
- 48  
49  
50  
51  
52  
53  
54  
55  
56  
57  
58  
59

Table 1. General measurements of all subjects at baseline who progressed to diverse hyperglycemic status during follow-up

|                                     | NGT<br>(n = 972)             | Isolated IFG<br>(n = 159)  | Isolated IGT<br>(n = 342)   | IFG+IGT<br>(n = 152)       | NDDM<br>(n = 260)            | overall P<br>value |
|-------------------------------------|------------------------------|----------------------------|-----------------------------|----------------------------|------------------------------|--------------------|
| Follow-up time (year)               | 3.00 (2.92-4.17)‡            | 3.00 (2.92-4.17)‡          | 2.92 (2.92-3.17)*†          | 3.00 (2.92-3.17)           | 3.00 (2.92-3.17)             | 0.000              |
| Age (year)                          | 53.00<br>(46.00-59.00)†‡§¶   | 55.00<br>(48.00-62.00)*¶   | 59.00 (49.00-65.00)*        | 56.00<br>(49.00-62.00)*¶   | 60.00 (53.50-65.00)*†§       | 0.000              |
| Female (N/n%)                       | 675 (69.44%)                 | 96 (60.38%)                | 220 (64.33%)                | 97 (63.82%)                | 166 (63.85%)                 | 0.075              |
| Height (cm)                         | 158.00 (153.10-164.00)       | 159.45<br>(154.00-165.52)  | 157.00<br>(152.00-162.70)   | 157.10<br>(154.00-164.00)  | 156.00 (152.00-163.20)       | 0.492              |
| Weight (kg)                         | 58.00 (52.00-65.00)          | 60.50 (53.99-66.85)        | 60.00 (53.00-66.20)         | 62.10 (56.70-69.50)        | 62.00 (55.00-69.75)          | 0.498              |
| Hip circumference (cm)              | 93.00 (88.20-97.20)          | 94.00 (90.00-99.00)        | 95.00 (90.20-100.00)        | 96.00 (92.00-100.30)       | 96.00 (92.00-101.00)         | 0.879              |
| SBP (mmHg)                          | 115.67<br>(105.33-128.67)‡§¶ | 118.50<br>(107.46-133.00)¶ | 122.50<br>(109.33-136.67)*¶ | 123.00<br>(114.00-137.67)* | 130.67<br>(118.67-142.17)*†‡ | 0.000              |
| DBP (mmHg)                          | 74.33 (68.00-81.33)§¶        | 77.00 (70.00-83.75)        | 76.33 (69.00-83.33)¶        | 77.50 (72.33-82.67)*       | 79.00 (72.33-88.17)*‡        | 0.000              |
| FPG (mmol/L)                        | 5.08 (4.83-5.29)†§¶          | 5.20 (4.98-5.38)*          | 5.11 (4.90-5.33)            | 5.16 (4.93-5.36)*          | 5.16 (4.92-5.36)*            | 0.000              |
| 2hPG (mmol/L)                       | 6.15 (5.40-6.88)‡§           | 6.14 (5.45-6.93)           | 6.40 (5.67-7.09)*           | 6.54 (5.85-7.10)*          | 6.33 (5.50-7.08)             | 0.000              |
| HbA1c (%)                           | 5.60 (5.30-5.90)‡§¶          | 5.70 (5.48-5.90)           | 5.70 (5.40-5.90)*           | 5.70 (5.50-6.00)*          | 5.70 (5.40-6.00)*            | 0.000              |
| TG (mmol/L)                         | 1.10 (0.80-1.60)             | 1.12 (0.80-1.63)           | 1.11 (0.84-1.59)            | 1.14 (0.89-1.60)           | 1.07 (0.81-1.50)             | 0.494              |
| TC (mmol/L)                         | 4.46 ± 1.01                  | 4.45 ± 1.17                | 4.50 ± 1.02                 | 4.72 ± 1.14                | 4.52 ± 1.10                  | 0.062              |
| HDL-c (mmol/L)                      | 1.32 (1.09-1.60)             | 1.32 (1.05-1.52)           | 1.30 (1.08-1.56)            | 1.36 (1.20-1.57)           | 1.31 (1.09-1.60)             | 0.376              |
| LDL-c (mmol/L)                      | 2.51 (2.04-3.03)             | 2.44 (1.97-3.09)           | 2.53 (1.99-2.99)            | 2.65 (2.06-3.17)           | 2.45 (1.95-3.01)             | 0.688              |
| Family history of diabetes<br>(N/%) | 119 (12.24%)                 | 12 (7.55%)                 | 29 (8.48%)                  | 18 (11.84%)                | 29 (11.15%)                  | 0.214              |
| Current smoker (N/%)                | 137 (14.10%)                 | 28 (17.61%)                | 42 (12.28%)                 | 18 (11.84%)                | 44 (16.92%)                  | 0.307              |
| Physical activity (N/%)             | 719 (73.97%)                 | 107 (67.30%)               | 255 (74.56%)                | 113 (74.34%)               | 195 (75.00%)                 | 0.435              |

NGT, normal glucose tolerance; isolated IFG, isolated impaired fasting glucose; isolated IGT, isolated impaired glucose tolerance; IFG+IGT, IFG combined IGT;



1  
2  
3  
4  
5  
6  
7 NDDM, newly-diagnosed diabetes mellitus; SBP, systolic blood pressure; DBP, diastolic blood pressure; FPG, fasting plasma glucose; 2hPG, 2 hour plasma glucose  
8 (after oral glucose tolerance test); TG, triglyceride; TC, total cholesterol; HDL-c, high-density lipoprotein cholesterol; LDL-c, low-density lipoprotein cholesterol.

9 Data are expressed as means $\pm$  SD or median (interquartile range) or N (%).

10 Chi-square test was used to compare gender compositions, family history of diabetes, current smoking status and physical activity among five groups. If needed,  
11 chi-square segmentation was applied for further comparisons between any two subgroups with an adjusted significance level ( $\alpha = 0.005$ ).

12 Kruskal-Wallis H analysis was applied for follow-up time among five groups. Mann-Whitney U analysis was performed for comparison within any two subgroups  
13 additionally ( $\alpha = 0.005$ ).

14 One-way ANOVA analysis was used for the rest measurements among five groups, while LSD analysis was applied for age, SBP, DBP, FPG, 2hPG and HbA1c  
15 comparisons between any two subgroups ( $\alpha = 0.005$ ).

16  
17 \* vs. NGT,  $p < 0.005$ ; † vs. isolated IFG,  $p < 0.005$ ; ‡ vs. isolated IGT,  $P < 0.005$ ; § vs. IFG+IGT,  $P < 0.005$ ; ¶ vs. NDDM,  $P < 0.005$ .

Table 2. Anthropometric indicators of participants who further transitioned to diverse hyperglycemic statuses at follow-up and baseline

|                             | NGT<br>(n = 972)        | Isolated IFG<br>(n = 159) | Isolated IGT<br>(n = 342) | IFG+IGT<br>(n = 152)   | NDDM<br>(n = 260)      | overall P<br>value |
|-----------------------------|-------------------------|---------------------------|---------------------------|------------------------|------------------------|--------------------|
| At follow-up survey         |                         |                           |                           |                        |                        |                    |
| WhtR (cm/cm)                | 0.51 (0.47-0.55)‡§¶     | 0.52 (0.48-0.56)§¶        | 0.53 (0.49-0.57)*§¶       | 0.54 (0.51-0.59)*†‡    | 0.56 (0.52-0.60)*†‡    | 0.000              |
| BMI (kg/m <sup>2</sup> )    | 23.46 (21.77-25.53)†‡§¶ | 24.27 (22.49-26.17)*¶     | 24.44 (22.63-26.50)*¶     | 25.09 (23.62-27.01)*   | 25.73 (23.29-27.82)*†‡ | 0.000              |
| Waist circumference<br>(cm) | 80.65 (74.00-87.00)†‡§¶ | 82.80 (77.00-91.00)*§¶    | 84.00 (78.00-90.00)*§¶    | 86.70 (80.28-93.00)*†‡ | 88.00 (82.00-95.00)*†‡ | 0.000              |
| WHR (cm/cm)                 | 0.86 (0.81-0.91)†‡§¶    | 0.88 (0.84-0.92)*¶        | 0.88 (0.83-0.92)*¶        | 0.90 (0.86-0.94)*      | 0.91 (0.87-0.95)*†‡    | 0.000              |
| At baseline survey          |                         |                           |                           |                        |                        |                    |
| WhtR (cm/cm)                | 0.50 ± 0.05†‡§¶         | 0.52 ± 0.06*§¶            | 0.53 ± 0.05*¶             | 0.54 ± 0.05*†          | 0.55 ± 0.06*†‡         | 0.000              |
| BMI (kg/m <sup>2</sup> )    | 23.03 (21.23-25.16)‡§¶  | 23.31 (21.56-25.64)¶      | 24.03 (22.10-26.22)*      | 24.98 (23.47-26.67)*   | 25.42 (23.17-27.22)*†  | 0.000              |
| Waist circumference<br>(cm) | 79.00 (73.00-86.00)     | 82.00 (76.00-89.00)       | 83.00 (77.10-89.00)       | 87.00 (81.00-91.28)    | 86.00 (80.00-93.00)    | 0.282              |
| WHR (cm/cm)                 | 0.86 (0.81-0.90)¶       | 0.87 (0.92-0.92)          | 0.87 (0.82-0.91)          | 0.89 (0.86-0.93)       | 0.90 (0.86-0.94)*      | 0.010              |

NGT, normal glucose tolerance; isolated IFG, isolated impaired fasting glucose; isolated IGT, isolated impaired glucose tolerance; IFG+IGT, IFG combined IGT; NDDM, newly-diagnosed diabetes mellitus; WhtR, waist-to-height ratio; BMI, body mass index; WHR, waist-to-hip ratio.

Data are expressed as median (interquartile range).

At follow-up survey: One-way ANOVA analysis was used for WhtR, BMI and WC among the five glucose metabolic groups. LSD analysis was applied for the further comparisons between any two subgroups ( $\alpha = 0.005$ ). Kruskal-Wallis H analysis was applied for WHR among the five groups and Mann-Whitney U analysis was performed for the following comparisons within any two subgroups ( $\alpha = 0.005$ ).

At baseline survey: One-way ANOVA analysis was used for all indices among the five glucose metabolic groups. LSD analysis was applied for WhtR, BMI and WHR between any two subgroups' comparison ( $\alpha = 0.005$ ).

\* vs. NGT,  $p < 0.005$ ; † vs. isolated IFG,  $p < 0.005$ ; ‡ vs. isolated IGT,  $P < 0.005$ ; § vs. IFG+IGT,  $P < 0.005$ ; ¶ vs. NDDM,  $P < 0.005$ .

Table 3. ROC curve analysis of baseline anthropometric indices for predicting future hyperglycemic disorders

|                          | AUC   | SE    | P value | 95%CI         | Cut-off point | Youden's value | Sensitivity | Specificity | DeLong's test (P value) |                          |                          |             |
|--------------------------|-------|-------|---------|---------------|---------------|----------------|-------------|-------------|-------------------------|--------------------------|--------------------------|-------------|
|                          |       |       |         |               |               |                |             |             | WHtR (cm/cm)            | BMI (kg/m <sup>2</sup> ) | Waist circumference (cm) | WHR (cm/cm) |
| Isolated IFG             |       |       |         |               |               |                |             |             |                         |                          |                          |             |
| WHtR (cm/cm)             | 0.578 | 0.025 | 0.002   | (0.529-0.626) | 0.51          | 0.151          | 54.90%      | 60.19%      | -                       | 0.010                    | 0.201                    | 0.611       |
| BMI (kg/m <sup>2</sup> ) | 0.544 | 0.025 | 0.081   | (0.495-0.593) | 21.36         | 0.078          | 80.40%      | 27.43%      | 0.010                   | -                        | 0.023                    | 0.421       |
| Waist circumference (cm) | 0.592 | 0.024 | 0.000   | (0.545-0.639) | 77.10         | 0.148          | 71.24%      | 43.54%      | 0.201                   | 0.023                    | -                        | 0.195       |
| Women                    | 0.584 | 0.031 | 0.010   | (0.524-0.644) | 75.00         | 0.166          | 74.44%      | 42.11%      | -                       | -                        | -                        | -           |
| Men                      | 0.579 | 0.041 | 0.050   | (0.526-0.631) | 87.00         | 0.165          | 49.21%      | 67.24%      | -                       | -                        | -                        | -           |
| WHR (cm/cm)              | 0.567 | 0.026 | 0.008   | (0.537-0.597) | 0.88          | 0.128          | 47.06%      | 65.71%      | 0.611                   | 0.421                    | 0.195                    | -           |
| Women                    | 0.568 | 0.033 | 0.036   | (0.504-0.632) | 0.85          | 0.140          | 57.78%      | 56.19%      | -                       | -                        | -                        | -           |
| Men                      | 0.525 | 0.042 | 0.534   | (0.471-0.578) | 0.90          | 0.095          | 53.97%      | 55.52%      | -                       | -                        | -                        | -           |
| Isolated IGT             |       |       |         |               |               |                |             |             |                         |                          |                          |             |
| WHtR (cm/cm)             | 0.634 | 0.017 | 0.000   | (0.600-0.667) | 0.51          | 0.214          | 62.24%      | 59.12%      | -                       | 0.003                    | 0.006                    | 0.000       |
| BMI (kg/m <sup>2</sup> ) | 0.591 | 0.018 | 0.000   | (0.556-0.627) | 22.68         | 0.155          | 68.88%      | 46.64%      | 0.003                   | -                        | 0.178                    | 0.223       |
| Waist circumference (cm) | 0.610 | 0.017 | 0.000   | (0.576-0.645) | 78.00         | 0.197          | 71.90%      | 47.81%      | 0.006                   | 0.178                    | -                        | 0.001       |
| Women                    | 0.635 | 0.021 | 0.000   | (0.593-0.676) | 78.00         | 0.260          | 68.42%      | 57.59%      | -                       | -                        | -                        | -           |
| Men                      | 0.542 | 0.032 | 0.174   | (0.480-0.605) | 87.80         | 0.132          | 43.44%      | 69.76%      | -                       | -                        | -                        | -           |
| WHR (cm/cm)              | 0.567 | 0.018 | 0.000   | (0.539-0.594) | 0.86          | 0.123          | 61.63%      | 50.64%      | 0.000                   | 0.223                    | 0.001                    | -           |
| Women                    | 0.587 | 0.022 | 0.000   | (0.544-0.630) | 0.82          | 0.154          | 77.03%      | 38.39%      | -                       | -                        | -                        | -           |
| Men                      | 0.524 | 0.032 | 0.433   | (0.463-0.586) | 0.89          | 0.098          | 57.38%      | 52.41%      | -                       | -                        | -                        | -           |
| IFG+IGT                  |       |       |         |               |               |                |             |             |                         |                          |                          |             |

|    |                          |       |       |       |               |       |       |        |        |       |       |       |       |
|----|--------------------------|-------|-------|-------|---------------|-------|-------|--------|--------|-------|-------|-------|-------|
| 6  | WHtR (cm/cm)             | 0.713 | 0.022 | 0.000 | (0.670-0.755) | 0.53  | 0.351 | 62.33% | 72.79% | -     | 0.106 | 0.556 | 0.026 |
| 7  | BMI (kg/m <sup>2</sup> ) | 0.685 | 0.022 | 0.000 | (0.642-0.729) | 23.38 | 0.316 | 77.40% | 54.22% | 0.106 | -     | 0.254 | 0.492 |
| 8  | Waist circumference (cm) | 0.706 | 0.021 | 0.000 | (0.665-0.748) | 79.80 | 0.351 | 82.88% | 52.19% | 0.556 | 0.254 | -     | 0.032 |
| 9  | Women                    | 0.732 | 0.026 | 0.000 | (0.682-0.783) | 79.80 | 0.420 | 79.57% | 62.38% | -     | -     | -     | -     |
| 10 | Men                      | 0.656 | 0.039 | 0.000 | (0.579-0.733) | 90.30 | 0.242 | 43.40% | 80.76% | -     | -     | -     | -     |
| 11 | WHR (cm/cm)              | 0.667 | 0.022 | 0.000 | (0.638-0.695) | 0.87  | 0.274 | 69.18% | 58.23% | 0.026 | 0.492 | 0.032 | -     |
| 12 | Women                    | 0.686 | 0.027 | 0.000 | (0.633-0.739) | 0.83  | 0.312 | 86.02% | 45.20% | -     | -     | -     | -     |
| 13 | Men                      | 0.631 | 0.038 | 0.003 | (0.556-0.705) | 0.92  | 0.261 | 54.72% | 71.38% | -     | -     | -     | -     |
| 14 |                          |       |       |       |               |       |       |        |        |       |       |       |       |
| 15 |                          |       |       |       |               |       |       |        |        |       |       |       |       |
| 16 |                          |       |       |       |               |       |       |        |        |       |       |       |       |
| 17 | NDDM                     |       |       |       |               |       |       |        |        |       |       |       |       |
| 18 | WHtR (cm/cm)             | 0.730 | 0.017 | 0.000 | (0.696-0.764) | 0.52  | 0.366 | 74.21% | 62.43% | -     | 0.000 | 0.001 | 0.010 |
| 19 | BMI (kg/m <sup>2</sup> ) | 0.677 | 0.020 | 0.000 | (0.639-0.716) | 24.32 | 0.315 | 64.68% | 66.81% | 0.000 | -     | 0.093 | 0.596 |
| 20 | Waist circumference (cm) | 0.700 | 0.018 | 0.000 | (0.665-0.735) | 78.00 | 0.292 | 81.35% | 47.81% | 0.001 | 0.093 | -     | 0.429 |
| 21 | Women                    | 0.714 | 0.021 | 0.000 | (0.673-0.756) | 77.10 | 0.344 | 81.76% | 52.63% | -     | -     | -     | -     |
| 22 | Men                      | 0.686 | 0.033 | 0.000 | (0.622-0.750) | 88.00 | 0.298 | 56.99% | 72.85% | -     | -     | -     | -     |
| 23 | WHR (cm/cm)              | 0.688 | 0.018 | 0.000 | (0.661-0.715) | 0.88  | 0.304 | 67.73% | 62.71% | 0.010 | 0.596 | 0.429 | -     |
| 24 | Women                    | 0.696 | 0.022 | 0.000 | (0.653-0.738) | 0.84  | 0.301 | 79.75% | 50.31% | -     | -     | -     | -     |
| 25 | Men                      | 0.681 | 0.030 | 0.000 | (0.622-0.740) | 0.92  | 0.299 | 60.22% | 69.66% | -     | -     | -     | -     |

ROC, receiver operating characteristic; isolated IFG, isolated impaired fasting glucose; isolated IGT, isolated impaired glucose tolerance; IFG+IGT, IFG combined IGT; NDDM, newly-diagnosed diabetes mellitus; AUC, area under curve; SE, standard error; CI, confidence interval; WHtR, waist-to-height ratio; BMI, body mass index; WHR, waist-to-hip ratio.

Table 4. Multivariable analysis of baseline anthropometric indices in relation to subsequent incidences of pre-diabetes and NDDM

|                          | Isolated IFG |               |       | Isolated IGT |               |       | IFG+IGT |               |       | NDDM  |               |       |
|--------------------------|--------------|---------------|-------|--------------|---------------|-------|---------|---------------|-------|-------|---------------|-------|
|                          | HR           | 95% CI        | P     | HR           | 95% CI        | P     | HR      | 95% CI        | P     | HR    | 95% CI        | P     |
| WHtR (cm/cm)             | 1.471        | (0.901-2.402) | 0.123 | 1.951        | (1.550-2.457) | 0.000 | 3.002   | (2.137-4.216) | 0.000 | 2.765 | (2.065-3.703) | 0.000 |
| BMI (kg/m <sup>2</sup> ) | 1.186        | (0.699-2.012) | 0.526 | 1.571        | (1.241-1.988) | 0.000 | 3.298   | (2.224-4.892) | 0.000 | 2.305 | (1.773-2.998) | 0.000 |
| Waist circumference (cm) | 1.603        | (1.112-2.310) | 0.011 | 1.644        | (1.275-2.118) | 0.000 | 4.570   | (2.948-7.084) | 0.000 | 2.666 | (1.886-3.769) | 0.000 |
| WHR (cm/cm)              | 1.182        | (0.739-1.889) | 0.486 | 0.972        | (0.724-1.304) | 0.848 | 1.571   | (1.003-2.465) | 0.048 | 1.706 | (1.196-2.433) | 0.003 |

NDDM, newly-diagnosed diabetes mellitus; isolated IFG, isolated impaired fasting glucose; isolated IGT, isolated impaired glucose tolerance; IFG+IGT, IFG combined IGT; HR, hazard ratio; CI, confidence interval; WHtR, waist-to-height ratio; BMI, body mass index; WHR, waist-to-hip ratio.

Cox proportional hazards models were used to calculate HR and 95% CI. A univariable analysis was performed for each potential risk factor firstly, including age (years), gender (male/female), systolic blood pressure (mmHg), diastolic blood pressure (mmHg), fasting plasma glucose (mmol/L), 2h plasma glucose (mmol/L) (after oral glucose tolerance test), HbA1c (%), total cholesterol (mmol/L), triglyceride (mmol/L), high-density lipoprotein cholesterol (mmol/L), low-density lipoprotein cholesterol (mmol/L), diabetes family history (yes/no), current smoking status (yes/no), physical activity situation (none/mild/robust), WHtR (low/high), BMI (low/high), WC (low/high) and WHR (low/high). The four anthropometric indicators were dichotomized into low or high level by using cut-off values derived from previous ROC curve analysis. Then those risk factors with a P-value < 0.2 in univariable analysis were selected to enter the multivariable model.

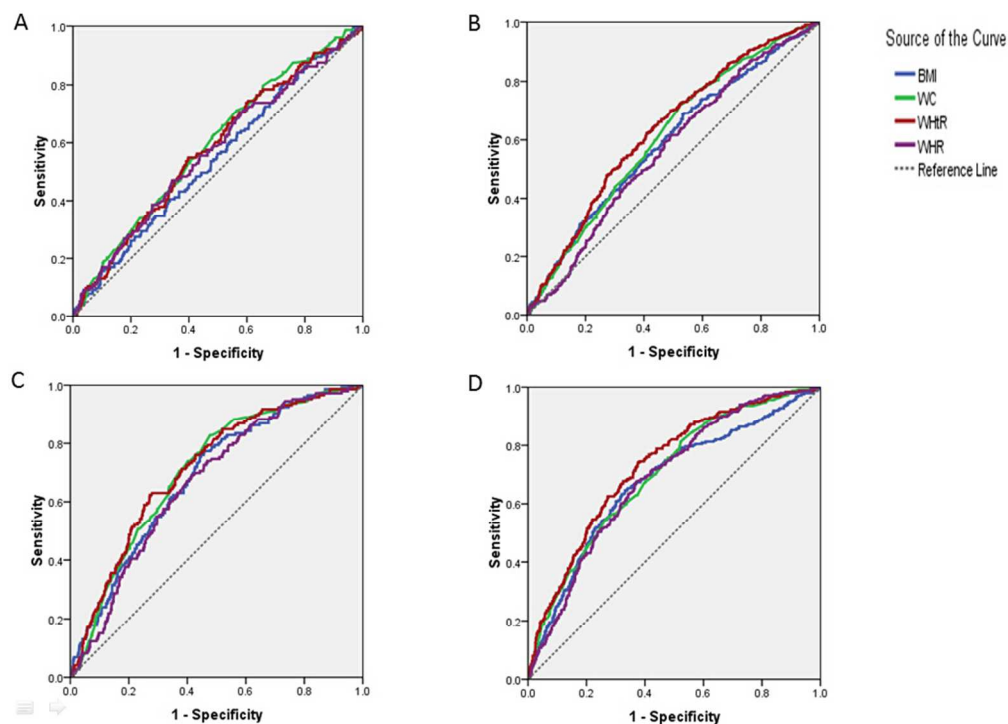

Figure 1. ROC curves of baseline anthropometric indices in subjects who further progressed to (A) isolated IFG, (B) isolated IGT, (C) IFG+IGT and (D) NDDM. ROC, receiver operating characteristic; isolated IFG, isolated impaired fasting glucose; isolated IGT, isolated impaired glucose tolerance; IFG+IGT, IFG combined with IGT; NDDM, newly-diagnosed diabetes mellitus; WHtR, waist-to-height ratio; BMI, body mass index; WHR, waist-to-hip ratio; WC, waist circumference.

266x191mm (96 x 96 DPI)

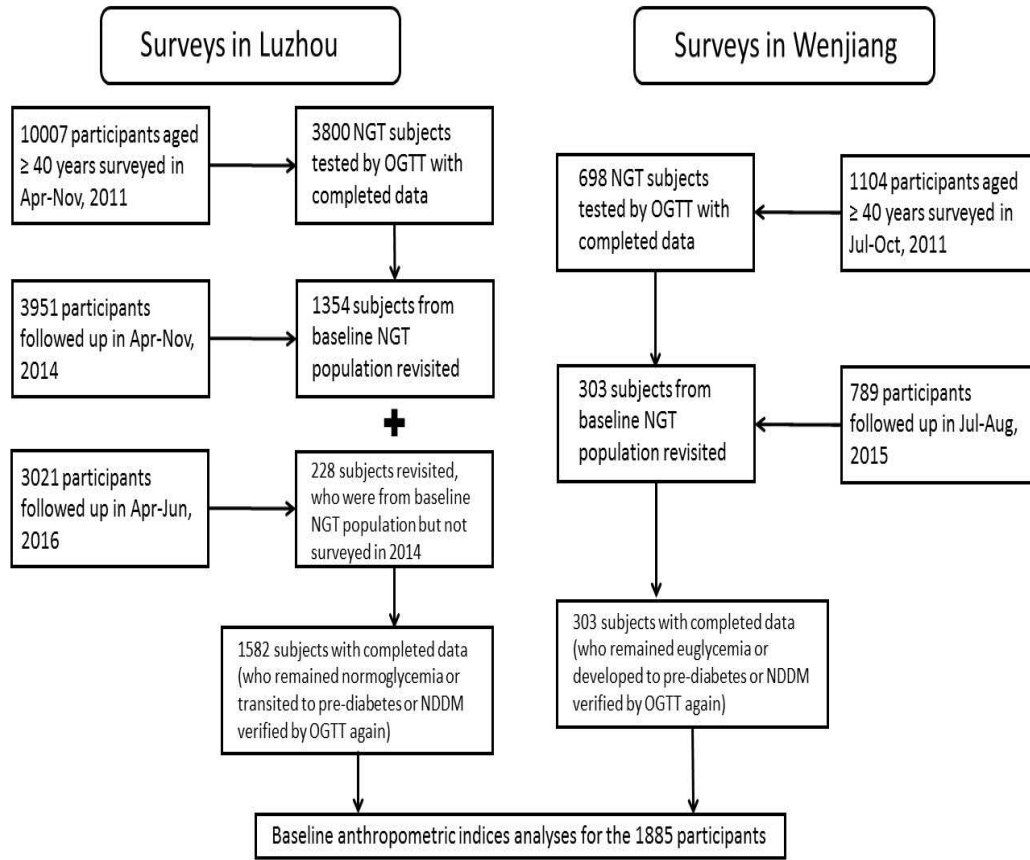

Supplemental Figure 1. Flow-chart of study design. NGT, normal glucose tolerance; OGTT, oral glucose tolerance test; NDDM, newly-diagnosed diabetes mellitus.

Supplemental Table 1. Baseline characteristics of all participants screened in Luzhou and Wenjiang

|                                    | Luzhou baseline survey |                        |                        | P     | Wenjiang baseline survey |                     |                     | P     |
|------------------------------------|------------------------|------------------------|------------------------|-------|--------------------------|---------------------|---------------------|-------|
|                                    | Total (n = 1582)       | Men (n = 495)          | Women (n = 1087)       |       | Total (n = 303)          | Men (n = 154)       | Women (n = 149)     |       |
| Age (year)                         | 57.00 (50.00-63.00)    | 60.00 (54.00-66.00)    | 56.00 (49.00-61.00)    | 0.000 | 47.00 (43.00-54.00)      | 47.00 (43.00-54.00) | 46.00 (42.00-52.00) | 0.161 |
| Female (N/n%)                      | 1087 (68.71%)          | -                      | -                      |       | 149 (49.17%)             | -                   | -                   |       |
| Height (cm)                        | 157.00 (152.40-163.00) | 165.00 (160.50-169.00) | 154.55 (151.00-158.20) | 0.180 | 161.28 ± 7.60            | 166.46 ± 5.27       | 155.56 ± 5.32       | 0.000 |
| Weight (kg)                        | 59.00 (53.00-65.30)    | 65.00 (58.30-72.00)    | 56.50 (51.20-62.50)    | 0.000 | 61.88 ± 11.36            | 67.66 ± 8.84        | 55.49 ± 10.38       | 0.000 |
| Hip circumference (cm)             | 94.00 (89.20-99.00)    | 95.00 (90.00-100.00)   | 94.00 (89.00-98.20)    | 0.655 | 93.47 ± 6.04             | 95.01 ± 5.43        | 91.76 ± 6.24        | 0.000 |
| SBP (mmHg)                         | 120.67 (108.67-135.67) | 126.00 (113.83-140.17) | 119.00 (107.00-133.37) | 0.000 | 114.90 ± 14.27           | 118.20 ± 14.02      | 111.26 ± 13.69      | 0.000 |
| DBP (mmHg)                         | 75.33 (69.00-82.67)    | 79.00 (71.67-88.17)    | 74.00 (68.00-80.67)    | 0.000 | 78.40 ± 16.26            | 81.15 ± 10.84       | 75.36 ± 20.27       | 0.001 |
| FPG (mmol/L)                       | 5.14 (4.93-5.34)       | 5.15 (4.96-5.38)       | 5.13 (4.92-5.32)       | 0.011 | 4.90 (4.60-5.10)         | 4.90 (4.70-5.20)    | 4.80 (4.60-5.10)    | 0.286 |
| 2hPG (mmol/L)                      | 6.32 (5.57-7.00)       | 6.32 (5.57-6.98)       | 6.32 (5.57-7.01)       | 0.777 | 6.00 (5.00-6.70)         | 5.90 (5.03-5.78)    | 6.00 (5.00-6.80)    | 0.541 |
| HbA1c (%)                          | 5.70 (5.40-5.90)       | 5.70 (5.50-5.95)       | 5.70 (5.40-5.90)       | 0.069 | 5.48 ± 0.42              | 5.51 ± 0.38         | 5.45 ± 0.45         | 0.228 |
| TG (mmol/L)                        | 1.33 ± 0.94            | 1.29 ± 0.84            | 1.34 ± 0.98            | 0.388 | 1.10 (0.80-1.80)         | 1.50 (0.90-2.18)    | 0.90 (0.70-1.50)    | 0.000 |
| TC (mmol/L)                        | 4.44 (3.75-5.18)       | 4.32 (3.63-5.12)       | 4.50 (3.82-5.19)       | 0.017 | 4.53 ± 0.83              | 4.60 ± 0.82         | 4.45 ± 0.83         | 0.178 |
| HDL-c (mmol/L)                     | 1.28 (1.06-1.52)       | 1.26 (1.03-1.52)       | 1.29 (1.08-1.52)       | 0.107 | 1.59 ± 0.39              | 1.47 ± 0.32         | 1.71 ± 0.41         | 0.000 |
| LDL-c (mmol/L)                     | 2.52 ± 0.77            | 2.47 ± 0.74            | 2.54 ± 0.79            | 0.078 | 2.86 ± 0.75              | 2.92 ± 0.70         | 2.79 ± 0.80         | 0.252 |
| WHtR (cm/cm)                       | 0.52 (0.48-0.56)       | 0.53 (0.49-0.56)       | 0.52 (0.48-0.56)       | 0.900 | 0.49 (0.45-0.53)         | 0.50 (0.47-0.53)    | 0.47 (0.44-0.51)    | 0.000 |
| BMI (kg/m <sup>2</sup> )           | 23.74 (21.61-26.00)    | 24.04 (21.81-26.14)    | 23.68 (21.51-25.92)    | 0.462 | 23.49 (21.64-25.59)      | 24.40 (22.33-26.03) | 22.44 (21.10-24.24) | 0.000 |
| Waist circumference (cm)           | 82.00 (76.00-89.00)    | 87.00 (80.00-92.45)    | 80.00 (75.00-87.10)    | 0.201 | 79.00 (72.00-86.00)      | 84.00 (79.00-89.00) | 73.00 (69.75-78.00) | 0.000 |
| WHR (cm/cm)                        | 0.86 (0.80-0.91)       | 0.89 (0.83-0.94)       | 0.85 (0.79-0.90)       | 0.476 | 0.86 (0.80-0.91)         | 0.83 (0.78-0.89)    | 0.87 (0.81-0.92)    | 0.256 |
| Outcomes at follow-up: N/total (%) |                        |                        |                        |       |                          |                     |                     |       |
| NGT                                | 757 (47.85%)           | 203 (41.01%)           | 554 (50.97%)           | -     | 215 (70.96%)             | 103 (66.88%)        | 112 (75.17%)        | -     |
| Isolated IFG                       | 131 (8.28%)            | 51 (10.30%)            | 80 (7.34%)             | -     | 28 (9.24%)               | 12 (7.79%)          | 16 (10.74%)         | -     |
| Isolated IGT                       | 304 (19.22%)           | 103 (20.81%)           | 201 (18.49%)           | -     | 38 (12.54%)              | 24 (15.58%)         | 14 (9.40%)          | -     |
| IFG+IGT                            | 137 (8.66%)            | 46 (9.29%)             | 91 (8.37%)             | -     | 15 (4.95%)               | 11 (7.14%)          | 4 (2.68%)           | -     |



1  
2  
3  
4  
5  
6  
7  
8  
9  
10  
11  
12  
13  
14  
15  
16  
17  
18  
19  
20  
21  
22  
23  
24  
25  
26  
27  
28  
29  
30  
31  
32  
33  
34  
35  
36  
37  
38  
39  
40  
41  
42  
43  
44  
45  
46  
47

|      |              |             |              |   |           |           |           |   |
|------|--------------|-------------|--------------|---|-----------|-----------|-----------|---|
| NDDM | 253 (15.99%) | 92 (18.59%) | 161 (14.81%) | - | 7 (2.31%) | 4 (2.61%) | 3 (2.01%) | - |
|------|--------------|-------------|--------------|---|-----------|-----------|-----------|---|

SBP, systolic blood pressure; DBP, diastolic blood pressure; FPG, fasting plasma glucose; 2hPG, 2 hour plasma glucose (after oral glucose tolerance test); TG, triglyceride; TC, total cholesterol; HDL-c, high-density lipoprotein cholesterol; LDL-c, low-density lipoprotein cholesterol; WHtR, waist-to-height ratio; BMI, body mass index; WHR, waist-to-hip ratio; NGT, normal glucose tolerance; isolated IFG, isolated impaired fasting glucose; isolated IGT, isolated impaired glucose tolerance; IFG+IGT, IFG combined IGT; NDDM, newly-diagnosed diabetes mellitus.

Data are expressed as means± SD or median (interquartile range) or N (%).

Mann-Whitney U analysis was used for DBP and BMI in Luzhou, TG and HDL-c in Wenjiang; one-way ANOVA analysis was used for the rest measurements in two surveys.

P value of men vs. women

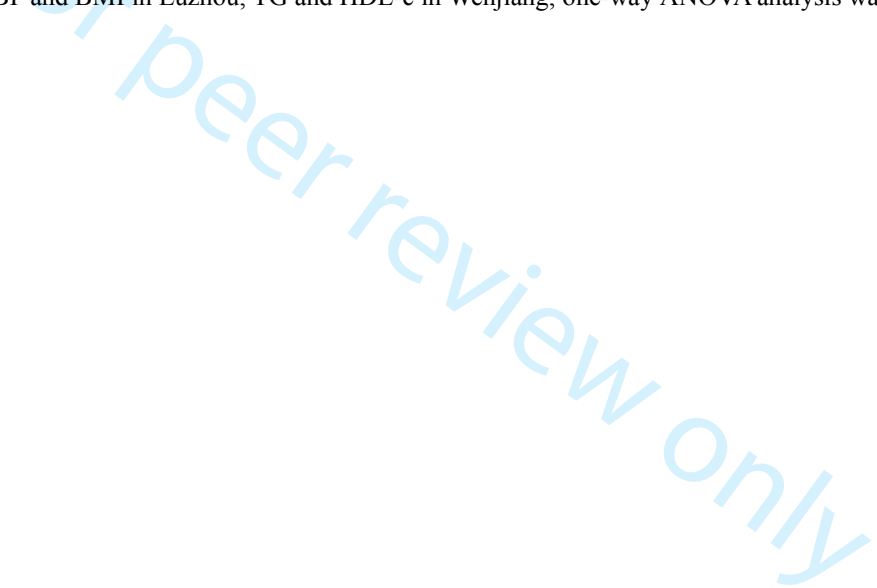

**STROBE 2007 (v4) checklist of items to be included in reports of observational studies in epidemiology\***  
**Checklist for cohort, case-control, and cross-sectional studies (combined)**

| Section/Topic             | Item # | Recommendation                                                                                                                                                                                                                                                                                                                                                                                                                                                         | Reported on page # |
|---------------------------|--------|------------------------------------------------------------------------------------------------------------------------------------------------------------------------------------------------------------------------------------------------------------------------------------------------------------------------------------------------------------------------------------------------------------------------------------------------------------------------|--------------------|
| Title and abstract        | 1      | (a) Indicate the study's design with a commonly used term in the title or the abstract                                                                                                                                                                                                                                                                                                                                                                                 | 1, 2               |
|                           |        | (b) Provide in the abstract an informative and balanced summary of what was done and what was found                                                                                                                                                                                                                                                                                                                                                                    | 2                  |
| <b>Introduction</b>       |        |                                                                                                                                                                                                                                                                                                                                                                                                                                                                        |                    |
| Background/rationale      | 2      | Explain the scientific background and rationale for the investigation being reported                                                                                                                                                                                                                                                                                                                                                                                   | 4                  |
| Objectives                | 3      | State specific objectives, including any pre-specified hypotheses                                                                                                                                                                                                                                                                                                                                                                                                      | 4                  |
| <b>Methods</b>            |        |                                                                                                                                                                                                                                                                                                                                                                                                                                                                        |                    |
| Study design              | 4      | Present key elements of study design early in the paper                                                                                                                                                                                                                                                                                                                                                                                                                | 4, 5               |
| Setting                   | 5      | Describe the setting, locations, and relevant dates, including periods of recruitment, exposure, follow-up, and data collection                                                                                                                                                                                                                                                                                                                                        | 4, 5               |
| Participants              | 6      | (a) <i>Cohort study</i> —Give the eligibility criteria, and the sources and methods of selection of participants. Describe methods of follow-up<br><i>Case-control study</i> —Give the eligibility criteria, and the sources and methods of case ascertainment and control selection. Give the rationale for the choice of cases and controls<br><i>Cross-sectional study</i> —Give the eligibility criteria, and the sources and methods of selection of participants | 4, 5               |
|                           |        | (b) <i>Cohort study</i> —For matched studies, give matching criteria and number of exposed and unexposed<br><i>Case-control study</i> —For matched studies, give matching criteria and the number of controls per case                                                                                                                                                                                                                                                 | NA                 |
| Variables                 | 7      | Clearly define all outcomes, exposures, predictors, potential confounders, and effect modifiers. Give diagnostic criteria, if applicable                                                                                                                                                                                                                                                                                                                               | 5, 6               |
| Data sources/ measurement | 8*     | For each variable of interest, give sources of data and details of methods of assessment (measurement). Describe comparability of assessment methods if there is more than one group                                                                                                                                                                                                                                                                                   | 5, 6               |
| Bias                      | 9      | Describe any efforts to address potential sources of bias                                                                                                                                                                                                                                                                                                                                                                                                              | NA                 |
| Study size                | 10     | Explain how the study size was arrived at                                                                                                                                                                                                                                                                                                                                                                                                                              | 4, 5               |
| Quantitative variables    | 11     | Explain how quantitative variables were handled in the analyses. If applicable, describe which groupings were chosen and why                                                                                                                                                                                                                                                                                                                                           | 5, 6               |
| Statistical methods       | 12     | (a) Describe all statistical methods, including those used to control for confounding                                                                                                                                                                                                                                                                                                                                                                                  | 6                  |
|                           |        | (b) Describe any methods used to examine subgroups and interactions                                                                                                                                                                                                                                                                                                                                                                                                    | 6                  |
|                           |        | (c) Explain how missing data were addressed                                                                                                                                                                                                                                                                                                                                                                                                                            | 6                  |
|                           |        | (d) <i>Cohort study</i> —If applicable, explain how loss to follow-up was addressed<br><i>Case-control study</i> —If applicable, explain how matching of cases and controls was addressed                                                                                                                                                                                                                                                                              | 6                  |

|                          |     |                                                                                                                                                                                                              |       |
|--------------------------|-----|--------------------------------------------------------------------------------------------------------------------------------------------------------------------------------------------------------------|-------|
|                          |     | <i>Cross-sectional study</i> —If applicable, describe analytical methods taking account of sampling strategy                                                                                                 |       |
|                          |     | (e) Describe any sensitivity analyses                                                                                                                                                                        | NA    |
| <b>Results</b>           |     |                                                                                                                                                                                                              |       |
| Participants             | 13* | (a) Report numbers of individuals at each stage of study—eg numbers potentially eligible, examined for eligibility, confirmed eligible, included in the study, completing follow-up, and analysed            | 7     |
|                          |     | (b) Give reasons for non-participation at each stage                                                                                                                                                         | 5     |
|                          |     | (c) Consider use of a flow diagram                                                                                                                                                                           | 5     |
| Descriptive data         | 14* | (a) Give characteristics of study participants (eg demographic, clinical, social) and information on exposures and potential confounders                                                                     | 6     |
|                          |     | (b) Indicate number of participants with missing data for each variable of interest                                                                                                                          | NA    |
|                          |     | (c) <i>Cohort study</i> —Summarise follow-up time (eg, average and total amount)                                                                                                                             | 5     |
| Outcome data             | 15* | <i>Cohort study</i> —Report numbers of outcome events or summary measures over time                                                                                                                          | 6     |
|                          |     | <i>Case-control study</i> —Report numbers in each exposure category, or summary measures of exposure                                                                                                         | NA    |
|                          |     | <i>Cross-sectional study</i> —Report numbers of outcome events or summary measures                                                                                                                           | NA    |
| Main results             | 16  | (a) Give unadjusted estimates and, if applicable, confounder-adjusted estimates and their precision (eg, 95% confidence interval). Make clear which confounders were adjusted for and why they were included | 7, 8  |
|                          |     | (b) Report category boundaries when continuous variables were categorized                                                                                                                                    | 6-8   |
|                          |     | (c) If relevant, consider translating estimates of relative risk into absolute risk for a meaningful time period                                                                                             | 7, 8  |
| Other analyses           | 17  | Report other analyses done—eg analyses of subgroups and interactions, and sensitivity analyses                                                                                                               | NA    |
| <b>Discussion</b>        |     |                                                                                                                                                                                                              |       |
| Key results              | 18  | Summarise key results with reference to study objectives                                                                                                                                                     | 8     |
| Limitations              | 19  | Discuss limitations of the study, taking into account sources of potential bias or imprecision. Discuss both direction and magnitude of any potential bias                                                   | 9, 10 |
| Interpretation           | 20  | Give a cautious overall interpretation of results considering objectives, limitations, multiplicity of analyses, results from similar studies, and other relevant evidence                                   | 8-10  |
| Generalisability         | 21  | Discuss the generalisability (external validity) of the study results                                                                                                                                        | 10    |
| <b>Other information</b> |     |                                                                                                                                                                                                              |       |
| Funding                  | 22  | Give the source of funding and the role of the funders for the present study and, if applicable, for the original study on which the present article is based                                                | 10    |

\*Give information separately for cases and controls in case-control studies and, if applicable, for exposed and unexposed groups in cohort and cross-sectional studies.

**Note:** An Explanation and Elaboration article discusses each checklist item and gives methodological background and published examples of transparent reporting. The STROBE checklist is best used in conjunction with this article (freely available on the Web sites of PLoS Medicine at <http://www.plosmedicine.org/>, Annals of Internal Medicine at <http://www.annals.org/>, and Epidemiology at <http://www.epidem.com/>). Information on the STROBE Initiative is available at [www.strobe-statement.org](http://www.strobe-statement.org).

# BMJ Open

## Identical anthropometric characteristics of impaired fasting glucose combined with impaired glucose tolerance and newly-diagnosed type 2 diabetes: anthropometric indicators to predict hyperglycemia in a community-based prospective cohort study in southwest China

|                                 |                                                                                                                                                                                                                                                                                                                                                                                                                                                                                                                                                                                                                                                                                                                                                                                                            |
|---------------------------------|------------------------------------------------------------------------------------------------------------------------------------------------------------------------------------------------------------------------------------------------------------------------------------------------------------------------------------------------------------------------------------------------------------------------------------------------------------------------------------------------------------------------------------------------------------------------------------------------------------------------------------------------------------------------------------------------------------------------------------------------------------------------------------------------------------|
| Journal:                        | <i>BMJ Open</i>                                                                                                                                                                                                                                                                                                                                                                                                                                                                                                                                                                                                                                                                                                                                                                                            |
| Manuscript ID                   | bmjopen-2017-019735.R1                                                                                                                                                                                                                                                                                                                                                                                                                                                                                                                                                                                                                                                                                                                                                                                     |
| Article Type:                   | Research                                                                                                                                                                                                                                                                                                                                                                                                                                                                                                                                                                                                                                                                                                                                                                                                   |
| Date Submitted by the Author:   | 12-Dec-2017                                                                                                                                                                                                                                                                                                                                                                                                                                                                                                                                                                                                                                                                                                                                                                                                |
| Complete List of Authors:       | Zhang, Fang; Sichuan University West China Hospital, Division of Endocrinology and Metabolism<br>Wan, Qin; Hospital affiliated to Southwest Medical University, Division of Endocrinology and Metabolism<br>Cao, Hongyi; The Fifth People's Hospital of Chengdu, Chengdu<br>Tang, Lizhi; Sichuan University West China Hospital, Division of Endocrinology and Metabolism<br>Li, Daigang; Chengdu Yinchao Community Hospital<br>Lú, Qingguo; Sichuan University West China Hospital<br>Yan, Zhe; Sichuan University West China Hospital<br>Li, Jing; Sichuan University West China Hospital<br>Yang, Qiu; The Fifth People's Hospital of Chengdu<br>Zhang, Yuwei; Sichuan University West China Hospital<br>Tong, Nanwei; Sichuan University West China Hospital, Division of Endocrinology and Metabolism |
| <b>Primary Subject Heading</b>: | Diabetes and endocrinology                                                                                                                                                                                                                                                                                                                                                                                                                                                                                                                                                                                                                                                                                                                                                                                 |
| Secondary Subject Heading:      | Epidemiology, Diabetes and endocrinology                                                                                                                                                                                                                                                                                                                                                                                                                                                                                                                                                                                                                                                                                                                                                                   |
| Keywords:                       | impaired fasting glucose combined with impaired glucose tolerance, newly-diagnosed diabetes mellitus, pre-diabetes, waist-to-height ratio, anthropometric measurements                                                                                                                                                                                                                                                                                                                                                                                                                                                                                                                                                                                                                                     |
|                                 |                                                                                                                                                                                                                                                                                                                                                                                                                                                                                                                                                                                                                                                                                                                                                                                                            |

SCHOLARONE™  
Manuscripts

## Title:

Identical anthropometric characteristics of impaired fasting glucose combined with impaired glucose tolerance and newly-diagnosed type 2 diabetes: anthropometric indicators to predict hyperglycemia in a community-based prospective cohort study in southwest China

## Authors:

Fang Zhang 1\*, Qin Wan 2\*, Hongyi Cao 3\*, Lizhi Tang 1, Daigang Li 4, Qingguo Lü 1, Zhe Yan 1, Jing Li 1, Qiu Yang 3, Yuwei Zhang 1, Nanwei Tong 1 $\Delta$

\*These authors contributed equally to this paper.

$\Delta$ Corresponding author

## Authors' affiliations:

1. Division of Endocrinology and Metabolism, West China Hospital of Sichuan University, Chengdu, Sichuan, China
2. Division of Endocrinology and Metabolism, Hospital affiliated to Southwest Medical University, Luzhou, Sichuan, China
3. Division of Endocrinology and Metabolism, The Fifth People's Hospital of Chengdu, Chengdu, Sichuan, China
4. Chengdu Yinchao Community Hospital, Chengdu, Sichuan, China

## Correspondences:

Address correspondence and reprint requests to Nanwei Tong, MD, Division of Endocrinology and Metabolism, West China Hospital of Sichuan University, 37 Guoxuexiang, Chengdu, Sichuan 610041, China. Telephone number: 00+86-18980601196. Fax number: 00+86-28-85423459. E-mail: [tongnw@scu.edu.cn](mailto:tongnw@scu.edu.cn).

## Abstract

**Objectives:** To assess the anthropometric characteristics of normoglycemic individuals who subsequently developed hyperglycemia, and to evaluate the validity of these measures to predict pre-diabetes and diabetes.

**Design:** A community-based prospective cohort study.

**Participants:** In total, 1885 residents with euglycemia from six communities were enrolled.

**Setting:** Sichuan, southwest China

**Primary outcome measures:** The incidences of pre-diabetes and diabetes were the primary outcomes.

**Methods:** The waist-to-height ratio (WHtR), body mass index (BMI), waist circumference (WC), and waist-to-hip ratio (WHR) of all participants were measured at baseline and during follow-up. A 75 g glucose oral glucose tolerance test was conducted at each survey.

**Results:** During a median of 3.00 (interquartile range: 2.92—4.17) years follow-up, the cumulative incidence of isolated impaired fasting glucose (IFG), isolated impaired glucose tolerance (IGT), IFG combined with IGT (IFG+IGT), and newly-diagnosed diabetes mellitus (NDDM) were 8.44%, 18.14%, 8.06%, and 13.79%, respectively. WHtR, BMI, WC, and WHR were significantly different among subjects who subsequently progressed to isolated IFG or IGT, IFG+IGT, or NDDM ( $P < 0.05$ ). The anthropometric characteristics of IFG+IGT subjects were similar to those of the NDDM population ( $P > 0.005$ ). All the baseline anthropometric measurements were useful for the prediction of future pre-diabetes and NDDM ( $P < 0.05$ ). The optimal thresholds for the four measurements were calculated for the prediction of hyperglycemia, with a WHtR value of 0.52 performing best to identify isolated IFG or IGT, IFG+IGT, and NDDM.

**Conclusions:** Anthropometric measures, especially WHtR, could be used to predict hyperglycemia 3 years in advance. Distinct from isolated IFG and IGT, the individuals who developed combined IFG+IGT had identical anthropometric profiles to those who progressed to NDDM.

**Key words:** anthropometric measurements, impaired fasting glucose combined with impaired glucose tolerance, newly-diagnosed diabetes mellitus, pre-diabetes, waist-to-height ratio

1  
2  
3 Strengths and limitations of this study

- 4 1. This study described and compared the anthropometric characteristics of participants  
5 who subsequently progressed to isolated impaired fasting glucose (IFG), isolated  
6 impaired glucose tolerance (IGT), IFG combined with IGT, newly-diagnosed diabetes  
7 mellitus (NDDM), or who remained normoglycemic.  
8  
9 2. Variations in waist-to-height ratio, body mass index, waist circumference, and  
10 waist-to-hip ratio, were used to predict the transition from euglycemia to pre-diabetes,  
11 and overt NDDM in the following 3 years.  
12  
13 3. The optimal threshold values for the prediction of hyperglycemia were determined from  
14 the anthropometric measurements collected.  
15  
16 4. The inherent limitations of the present work were a relatively short follow-up period  
17 (median 3 years), a low completion ratio of 41.9%, and a limited sample size, meaning  
18 that anthropometric threshold values could not be determined by gender for each  
19 category of hyperglycemia.  
20  
21  
22  
23  
24  
25  
26  
27  
28  
29  
30  
31  
32  
33  
34  
35  
36  
37  
38  
39  
40  
41  
42  
43  
44  
45  
46  
47  
48  
49  
50  
51  
52  
53  
54  
55  
56  
57  
58  
59  
60

## Introduction

The rapidly growing incidence of diabetes means that, it is now reaching epidemic proportions in China. The overall prevalences of diabetes and pre-diabetes were estimated to be 11.6% and 50.1%, respectively, in Chinese adults in 2010 [1]. In 2007—2008, another cross-sectional study conducted across China found that the prevalences of isolated impaired fasting glucose (IFG), isolated impaired glucose tolerance (IGT), and IFG combined with IGT (IFG+IGT), were 3.2%, 11.0%, and 1.9% in men, and 2.2%, 10.9%, and 1.7% in women, respectively [2]. Isolated IFG, isolated IGT, and IFG+IGT, were selected as three different categories of pre-diabetes, reflecting the progression from euglycemia to type 2 diabetes (T2D). Approximately 75%—80% of diabetes patients develop cardiovascular disease (CVD) ultimately, and patients with pre-diabetes have also been shown to be at greater risk of heart attack and stroke [3-5]. It has been estimated that between 2005 and 2015, diabetes and consequent CVD have cost China US\$ 557.7 billion [6].

Measures to limit pre-diabetes are critical for the prevention of diabetes. Early recognition of pre-diabetes and prompt intervention could also reduce the impact on society as a whole. Both overall and central adiposity are closely linked to hyperglycemia. Body mass index (BMI) correlates with overall adiposity, while waist circumference (WC), waist-to-height ratio (WHtR), and waist-to-hip ratio (WHR) are indicators of central obesity. These four anthropometric indices are used globally to assess the risk of current or future diabetes [7-9].

Anthropometry is an affordable and practical screening tool for the presence of hyperglycemia, in both wealthy and impoverished areas of China. In this community-based prospective cohort study, we aimed to determine whether these anthropometric indices could predict future pre-diabetes and diabetes, and to establish optimal threshold values for the population. The baseline anthropometric characteristics of normoglycemic subjects, who subsequently developed isolated IFG, isolated IGT, IFG+IGT, and newly-diagnosed diabetes mellitus (NDDM) during follow-up, were compared and the similarities and differences between pairs of hyperglycemic categories were analyzed.

## Study design and methods

### *Study population*

The present study included two populations, in Luzhou City and in the Wenjiang area of Chengdu City. The Luzhou population are participants in the Risk Evaluation of cAncers in Chinese diabeTic Individuals: a lONgitudinal (REACTION) study, which is multicenter prospective observational study of 25 communities in mainland China [10, 11]. A total of 10007 residents, aged 40—89 years, were randomly recruited to participate in this study from five communities in Luzhou in 2011. Subjects with a history of diabetes, incident diabetes, or pre-diabetes, verified by an oral glucose tolerance test (OGTT), those missing values or any parameter, or having any of the other conditions (listed below), were excluded. After this, 3800 individuals with normoglycemia remained to form the baseline population. Of these, 1354 participants returned to complete the study in 2014. In addition, in 2016, 228 members of the baseline normoglycemic population who had not been studied in 2014, were followed up. Therefore, data from a total of 1582 subjects from Luzhou baseline screen were available



1  
2  
3 for analysis.

4  
5 In the Wenjiang survey, a cohort of 1104 participants aged 40–75 years were randomly  
6 recruited from Yinchao community in 2011. Using the same inclusion criteria, 698  
7 normoglycemic individuals comprised the baseline population. Of these, 303 subjects were  
8 followed up in 2015 and completed the study. Thus, from Luzhou and Wenjiang, a total of  
9 1885 participants were included in the analysis.  
10  
11

12 All of the subjects were of Han Chinese ethnicity. A flow diagram of the study design is  
13 displayed as Supplemental Figure 1. Individuals with the following conditions were excluded  
14 from the study: infection, pregnancy, malignant tumor, acute cardiovascular accident, serious  
15 trauma, liver or renal dysfunction, or long history of glucocorticoid use. The research was  
16 conducted in accordance with the principles of the Declaration of Helsinki II. All protocols  
17 used in this work were approved either by the Medical Ethics Committee of the hospital  
18 affiliated to the Southwest Medical University in Luzhou, or by the Committee on Human  
19 Research at the Fifth People's Hospital of Chengdu in Wenjiang. Each participant provided  
20 written informed consent.  
21  
22  
23

#### 24 25 *Diagnosis of diabetes and pre-diabetes*

26 The diagnosis of hyperglycemic disorder was made in accordance with the American Diabetes  
27 Association recommendations, using OGTT, in 2011 [12]. Normal glycemic tolerance (NGT)  
28 was defined by a fasting plasma glucose (FPG) < 5.6 mmol/L and a 2-hour plasma glucose  
29 (2hPG) < 7.8 mmol/L. Isolated IFG was defined by  $5.6 \text{ mmol/L} \leq \text{FPG} < 7.0 \text{ mmol/L}$  and a  
30  $2\text{hPG} < 7.8 \text{ mmol/L}$ , while isolated IGT was defined by an  $\text{FPG} < 5.6 \text{ mmol/L}$  and  $7.8$   
31  $\text{mmol/L} \leq 2\text{hPG} < 11.1 \text{ mmol/L}$ . IFG+IGT was defined by  $5.6 \text{ mmol/L} \leq \text{FPG} < 7.0 \text{ mmol/L}$   
32 and  $7.8 \text{ mmol/L} \leq 2\text{hPG} < 11.1 \text{ mmol/L}$ . Diabetes was defined by an  $\text{FPG} \geq 7.0 \text{ mmol/L}$   
33 and/or a  $2\text{hPG} \geq 11.1 \text{ mmol/L}$ .  
34  
35  
36

#### 37 38 *Anthropometric measurements*

39 Anthropometric measurements, including body mass, height, WC, and hip circumference  
40 were made by trained investigators. Measurements were conducted while all participants were  
41 wearing light clothing, without footwear after a 10–12 hour overnight fast in the morning.  
42 Measurements were made using calibrated weighing scales, standard steel strip stadiometers,  
43 and tape measures. The results were recorded to the nearest 0.1 kg or 0.1 cm. WC was  
44 measured at the midpoint between the costal border and the iliac crest at the end of exhalation.  
45 Hip circumference was measured around the widest portion of the buttocks. BMI was  
46 calculated as body mass (kg) divided by height squared ( $\text{m}^2$ ), WHtR was calculated as WC  
47 (cm) divided by height (cm), and WHR as WC (cm) divided by hip circumference (cm).  
48  
49

#### 50 51 *Lifestyle variables and biological evaluation*

52 Trained investigators collected lifestyle information, consisting of demographic  
53 characteristics, current smoking status, physical activity situation, medications, and personal  
54 and family disease histories, using a standard questionnaire and face-to-face interviews. The  
55 questionnaire categorized the participants into two groups: subjects undertaking vigorous  
56  
57  
58  
59

1  
2  
3 physical activity  $\geq 1$  day per week and subjects undertaking vigorous physical activity on  $< 1$   
4 day per week. Blood pressure (BP) was measured three times in each participant using an  
5 electronic sphygmomanometer (OMRON, HEM-7220, Liaoning, China), with 5 min intervals  
6 between measurements, after at least 10 min rest, and the mean value was recorded.  
7

8  
9 All participants underwent an OGTT. After a 10–12 hour overnight fast, venous blood was  
10 drawn both before and 2 hours after they drank 300 ml water containing 75 g anhydrous  
11 glucose within 5 min. FPG and 2hPG concentrations were measured within 24 hours using the  
12 hexokinase method (Hitachi 7600 automatic biochemical analyzer, Hitachi Ltd., Tokyo,  
13 Japan). Fasting blood samples were collected for lipid profile measurements, including total  
14 cholesterol (TC), triglyceride (TG), high-density lipoprotein cholesterol (HDL-c), and  
15 low-density lipoprotein cholesterol (LDL-c). Serum TC, TG, and HDL-c concentrations were  
16 measured using oxidase colorimetric methods, and LDL-c concentration was measured by  
17 homogeneous assay, on a Hitachi 7600 automatic biochemical analyzer (Hitachi Ltd., Tokyo,  
18 Japan) within 24 hours. Hemoglobin A1c (HbA1c) was measured using the high performance  
19 liquid chromatography (VARIANT™ II TURBO Hemoglobin Testing System, Bio-Rad  
20 Laboratories, CA, USA). The samples were stored at  $-20^{\circ}\text{C}$  until analysis, which was  
21 undertaken within 3 weeks.  
22  
23  
24  
25

### 26 *Statistical analysis*

27 Data were analyzed using SPSS software version 16.0 (SPSS, Chicago, IL, USA) and  
28 MedCalc software version 15.2.2 (MedCalc software, Ostend, Belgium). All data are  
29 expressed as mean  $\pm$  SD, median (interquartile range), or frequency (%), as appropriate.  
30 One-way ANOVA was used for parametric data, whereas the rank sum test was applied for  
31 non-parametric data. The chi-square test was used for the comparison of ratio. All tests were  
32 two-sided. In analyses of more than three groups, overall  $P < 0.05$  was considered significant.  
33 The Bonferroni correction and chi-square segmentation were used for multiple comparison  
34 adjustments. For the comparison of two specific subgroups,  $P < 0.005$  was considered  
35 significant. For BMI, WHtR, WC, and WHR, receiver operating characteristic (ROC) curve  
36 analyses were used to compare their ability to predict incident pre-diabetes and diabetes. The  
37 non-parametric approach described by DeLong *et al.* was used to compare the areas under  
38 ROC curves [13]. The predictive threshold values for hyperglycemia were calculated. COX  
39 proportional hazards regression was used to evaluate associations between anthropometric  
40 indices and hyperglycemic categories; the time axis consisted of the period of follow-up until  
41 pre-diabetes or diabetes developed, or the end of the study. Hazard ratio (HR) and 95%  
42 confidence interval (CI) were calculated.  
43  
44  
45  
46  
47

### 48 **Results**

#### 49 *Characteristics of subjects at baseline*

50 A total of 1885 normoglycemic subjects (649 men and 1236 women), with a median age of 56  
51 (interquartile range: 48–61) years old, were recruited in 2011. After a median follow-up of  
52 3.00 (2.92–4.17) years, 159 individuals had developed isolated IFG, 342 had developed  
53 isolated IGT, 152 had developed IFG+IGT, 260 had developed NDDM, and the remaining  
54 972 participants remained normoglycemic. The incidences of pre-diabetes and NDDM were  
55  
56  
57  
58  
59  
60

1  
2  
3 calculated to be 104.9 per 1000 person-years and 41.8 per 1000 person-years, respectively.  
4 The characteristics of all the subjects at baseline in Luzhou and Wenjiang are shown in  
5 Supplemental Table 1. The participants in Luzhou were older than the participants in  
6 Wenjiang, and had higher glucose levels at baseline and greater incidences of pre-diabetes and  
7 diabetes during follow-up. The baseline measurements of the participants who subsequently  
8 developed isolated IFG, isolated IGT, IFG+IGT, or NDDM in the future, are shown in Table 1.  
9 The subjects who developed NDDM were the oldest group at baseline of the five groups ( $P =$   
10 0.000). The individuals who transitioned to isolated IGT, IFG+IGT, or NDDM had higher  
11 baseline HbA1c levels than the subjects who remained normoglycemic ( $P < 0.005$ ).  
12  
13

#### 14 *Baseline and follow-up anthropometric values in subjects who subsequently developed* 15 *hyperglycemic disorders*

16  
17 During the follow-up examination, it was found that WHtR in the NGT group was lower than  
18 in the isolated IGT, IFG+IGT, or NDDM groups ( $P < 0.005$ ) (Table 2), and was lower in the  
19 isolated IFG and isolated IGT groups than in the IFG+IGT and NDDM groups ( $P < 0.005$ ).  
20 The  $P$  values were 0.009 and 0.006 for BMI in isolated IFG versus IFG+IGT, and isolated  
21 IGT versus IFG+IGT, respectively, and 0.005 for WHR in the isolated IFG or IGT groups  
22 versus the IFG+IGT group. There were the trends towards the differences in both BMI and  
23 WHR between the isolated IFG or IGT groups, and the IFG+IGT group. To summarize, BMI,  
24 WC, and WHR in the five hyperglycemic groups tended to follow the following pattern: NGT  
25  $<$  isolated IFG and isolated IGT  $<$  IFG+IGT and NDDM. Unlike when the isolated IFG or  
26 isolated IGT groups were compared, the anthropometric characteristics of the IFG+IGT group  
27 were similar to those of the NDDM at follow-up ( $P > 0.005$ ).  
28  
29  
30  
31

32 To assess whether the anthropometric values were already different before hyperglycemia  
33 developed, we evaluated the differences between groups at baseline, when all the subjects  
34 were still normoglycemic. Baseline WHtR, BMI, and WHR, but not WC, substantially  
35 differed among the five groups ( $P < 0.05$ ) (Table 2). NGT subjects had lower WHtR than the  
36 subjects who subsequently developed hyperglycemia ( $P < 0.005$ ). The WHtR values of the  
37 IFG+IGT and NDDM groups were higher than those of the isolated IFG group ( $P < 0.005$ ),  
38 while the isolated IGT group had a lower WHtR than the NDDM group ( $P < 0.005$ ). The BMI  
39 of the NGT group was lower than those of the isolated IGT, IFG+IGT, and NDDM groups ( $P$   
40  $< 0.005$ ), and the isolated IFG group had a lower BMI than NDDM subjects ( $P < 0.005$ ). In  
41 addition, NGT individuals had a lower WHR than NDDM patients at baseline ( $P < 0.005$ ).  
42 Consistent with the findings at follow-up, it is worth noting that at baseline, there were no  
43 significant differences in WHtR, BMI, and WHR between individuals who subsequently  
44 developed IFG+IGT and those who converted to NDDM ( $P > 0.005$ ).  
45  
46  
47  
48

#### 49 *Use of baseline anthropometric indices to predict future pre-diabetes and NDDM*

50 For the prediction of isolated IFG, baseline WHtR, WC, and WHR showed significantly  
51 different areas under the curve (AUCs) ( $P < 0.05$ ) (Table 3). WHtR and WC were more  
52 effective at predicting isolated IFG than BMI ( $P < 0.05$ ) (Figure 1A). For subjects who  
53 developed isolated IGT, the AUCs of all the four indices were significant ( $P = 0.000$ ). WHtR  
54 had a higher predictive value than BMI, WC, and WHR ( $P < 0.05$ ), while WC was superior to  
55  
56  
57  
58  
59  
60

1  
2  
3 WHR for predicting isolated IGT ( $P < 0.05$ ) (Figure 1B). For IFG+IGT incidence, all four  
4 parameters were valuable predictors ( $P = 0.000$ ), among which WHtR and WC ranked higher  
5 than WHR ( $P < 0.05$ ) (Figure 1C). For the prediction of NDDM, the four indices were  
6 significant ( $P < 0.05$ ), but WHtR was the best predictor ( $P < 0.05$ ) (Figure 1D). The optimal  
7 thresholds for predicting hyperglycemia for the four indices (WC and WHR thresholds for  
8 men and women) were then calculated.  
9

#### 10 11 *Multivariate analysis of baseline anthropometric indices with respect to risk of subsequent* 12 *pre-diabetes and NDDM*

13  
14 According to COX proportional hazards regression, the risk of developing isolated IFG was  
15 greater with higher WC at baseline ( $P < 0.05$ ) (Table 4). The risk factors for the development  
16 of isolated IGT were baseline WHtR, BMI, and WC ( $P < 0.05$ ). For both IFG+IGT and  
17 NDDM, high baseline WHtR, BMI, WC, and WHR were all risk factors ( $P < 0.05$ ).  
18

#### 19 20 Discussion

21 In this community-based prospective cohort study, we have shown that: (1) For patients with  
22 hyperglycemia, WHtR, BMI, WC, and WHR tended to be as follows: NGT < isolated IFG  
23 and isolated IGT < IFG+IGT and NDDM. (2) Among these categories of hyperglycemia, it is  
24 noteworthy that unlike with respect to isolated IFG and isolated IGT, there were no significant  
25 differences in baseline WHtR or BMI between subjects with IFG+IGT and NDDM. (3) Thus,  
26 WHtR, BMI, WC, and WHR could predict the presence of pre-diabetes or diabetes 3 years in  
27 advance. Furthermore, the greater were these baseline anthropometric values, the higher was  
28 the risk of developing hyperglycemia. (4) Optimal threshold values for the four variables for  
29 identification of pre-diabetes and diabetes were calculated, with WHtR performing best of  
30 these in the prediction of hyperglycemia.  
31  
32  
33

34  
35 An Iranian study of 5879 people 9 years after they were initially found to be normoglycemic,  
36 found that 1755 subjects had developed pre-diabetes, and that isolated IFG was the  
37 commonest pre-diabetic phenotype. This study found that among women, in contrast to the  
38 use of BMI, hip and waist circumferences, WHtR was the only significant anthropometric  
39 predictor of pre-diabetes [14]. Lyssenko *et al.* reported a study of 1190 subjects in Finland  
40 who initially had NGT. During a median follow-up of 6 years, 199 had progressed to  
41 pre-diabetes. Compared with those who remained NGT, those with pre-diabetes had  
42 substantially higher BMI and WHtR at baseline [15]. Many investigators have shown that  
43 anthropometry is tightly correlated with the occurrence of pre-diabetes, although most of the  
44 studies conducted have been cross-sectional, rather than longitudinal [16-19].  
45  
46  
47

48 After reviewing the literature, we found some common themes: (1) With respect to  
49 pre-diabetes, the majority of the studies only defined one or two distinct pre-diabetic  
50 phenotypes, or defined a single category called “pre-diabetes”. (2) Rarely did investigators  
51 describe the respective anthropometric characteristics of the various hyperglycemic disorders  
52 in their manuscripts. We located only one previous report that gave anthropometric  
53 information in detail for all the potential pre-diabetic phenotypes and NDDM [20]. It was  
54 shown in this study that WHtR, BMI, WC, and WHR varied substantially among subjects  
55  
56  
57  
58  
59  
60

1  
2  
3 with NGT, isolated IFG, isolated IGT, IFG+IGT, and NDDM, but none of the anthropometric  
4 indices were compared between hyperglycemic groups. Therefore, the possibility that  
5 anthropometry might vary between pre-diabetes and NDDM could not be assessed, and  
6 moreover, this study was cross-sectional. To our knowledge, the present work is the first  
7 prospective cohort study that not only described the anthropometric characteristics of  
8 participants who progressed to diverse hyperglycemic conditions, but also demonstrated the  
9 variation among WHtR, BMI, WC, and WHR in the transition from NGT to pre-diabetes and  
10 overt NDDM.  
11  
12

13  
14 The pathogenesis of isolated IFG and isolated IGT is heterogeneous, while individuals with  
15 IFG+IGT manifest both hepatic and peripheral insulin resistance. Pre-diabetes, as an  
16 intermediate hyperglycemic state, carries a high-risk for the subsequent development of  
17 diabetes. Among the three pre-diabetic phenotypes, IFG+IGT carries approximately twice the  
18 risk of transition to diabetes compared with subjects with just one of abnormalities [21]. In  
19 our previous work, we found that several biomarkers in individuals with IFG+IGT had similar  
20 values to those present in the NDDM population, but these were different in individuals with  
21 IFG or IGT alone [22-24]. Consistent with this, in the present study we observed that  
22 participants who subsequently developed hyperglycemia had higher WHtR, BMI, and WHR  
23 at baseline than those who remained NGT. Among the three pre-diabetic phenotypes,  
24 IFG+IGT subjects had the most adverse anthropometric profiles at baseline, such that there  
25 were no significant differences from the NDDM group. These findings may imply that  
26 although IFG+IGT is a subtype of pre-diabetes, some aspects of its pathophysiology have  
27 already deteriorated to the same extent as in NDDM. However, pre-diabetes is a reversible  
28 condition and consequently, prompt intervention is required to avoid or delay its progression,  
29 especially for patients with IFG+IGT.  
30  
31  
32  
33

34  
35 A prospective study conducted in Pima Indians found that BMI and WHtR were the best  
36 predictors of diabetes in men, while BMI, WHtR, WC, and waist-to-thigh ratio were the best  
37 predictors in women [25]. Chei *et al.* published a cohort study of 5617 Japanese participants,  
38 finding that in women only, the significant predictors of T2D were BMI, WC, and WHtR [26].  
39 Finally, in a multi-ethnic cohort of 1073 non-Hispanic white, Hispanic, and African American  
40 non-diabetic individuals, baseline anthropometric information showed that BMI was most  
41 predictive of diabetes in the non-Hispanic white and Hispanic populations, whereas all the  
42 indicators of central obesity were more predictive than measures of overall adiposity in the  
43 African American population [27]. The contrasts in these sets of data indicate that the validity  
44 of such anthropometric measurements for the prediction of diabetes development vary among  
45 different ethnicities, genders, and regions. Based on our ROC analysis, WHtR was most  
46 effective for the prediction of pre-diabetes and overt NDDM, followed by WC, while BMI  
47 and WHR were relatively weak predictors. Results from two western Pacific studies were  
48 consistent with our findings [28, 29].  
49  
50  
51  
52

53  
54 A systematic review proposed that the threshold values for WHtR in the prediction of diabetes  
55 in men and women are 0.52 and 0.53, respectively [30]. In a Chinese community-based  
56 prospective cohort study, the optimal threshold values for WHtR and BMI were 0.51 and 24  
57  
58  
59  
60

1  
2  
3 for men, and 0.55 and 25 for women, respectively [29]. These predictive values were similar  
4 to those identified in our study.  
5

6  
7 Several limitations to our work should be addressed. First, the follow-up period of a median  
8 3.00 years was relatively short. However, we identified high cumulative incidences of  
9 pre-diabetes and NDDM (34.6% and 13.8%, respectively). The fast pace of life and sedentary  
10 lifestyle of the population may be the main contributor to the rapid growth in hyperglycemia.  
11 However, it might also be the result of selection bias, because subjects with a higher risk  
12 might be more likely to take part in the follow-up assessment. In addition, the participants  
13 were  $\geq 40$  years old, a little older than the subjects ( $\geq 35$  years) in some other epidemiological  
14 studies. This might be also an explanation that a large proportion of subjects became  
15 hyperglycemic in this cohort study. Second, the proportion of participants attending the  
16 follow-up assessment was low (41.91%). Conducting of a phone interview once a year at least,  
17 followed by prompt examination, could improve this statistic in the future. Third, the sample  
18 size was limited. On account of this weakness, it was not possible to calculate anthropometric  
19 threshold values for each hyperglycemic state by gender. Further studies are required to  
20 establish specific screening thresholds for pre-diabetes and NDDM in men and women,  
21 especially with regard to WC and WHR. Fourth, there was lack of OGTT reproducibility in  
22 each set of measurements. Unwillingness of subjects, and limited staff and financial resources,  
23 were the two major causes of this. By combining these data with the questionnaire data and  
24 the HbA1c results, we tried to minimize the associated error and improve the diagnostic  
25 accuracy as much as possible.  
26  
27  
28  
29  
30

31 In summary, WHtR, BMI, WC, and WHR are all predictors of the development of  
32 pre-diabetes and NDDM 3 years in advance. Individuals with high WHtR, BMI, WC, and  
33 WHR are thus at higher risk of developing pre-diabetes and T2D. The optimal thresholds for  
34 all the anthropometric measures to predict hyperglycemia were calculated, with a WHtR value  
35 of 0.52 performing best at predicting the development of isolated IFG or IGT, IFG+IGT, and  
36 NDDM. The magnitude of WHtR and BMI in normoglycemic subjects illustrate the  
37 likelihood of progression from normoglycemia to pre-diabetes, and then to overt T2D. Of  
38 note, and in contrast to the situation with regard to isolated IFG or IGT, the anthropometric  
39 characteristics of IFG+IGT subjects were similar to those of the NDDM population, both at  
40 baseline and follow-up.  
41  
42  
43  
44  
45  
46  
47

#### 48 Contributorship statement

49 All the authors engaged in the surveys. FZ and NT designed this article. QW, HC, DL and QY  
50 acquired and collected data. JL, ZY, QL and YZ organized all the data. FZ, QW and HC  
51 analyzed all the information. FZ and LT drafted the manuscript. FZ and NT revised the article  
52 critically. All the authors read and approved the final manuscript.  
53  
54  
55  
56  
57  
58  
59

### Acknowledgements

All the authors appreciated the staffs from primary health care centers for materials supplement and participant organization.

### Competing interests

All the authors declared that there were no competing interests among them.

### Fundings

The surveys in Luzhou were supported by the grants from the National Clinical Research Center for Metabolic Diseases (2013BAI09B13), the National Key New Drug Creation and Manufacturing Program of Ministry of Science and Technology (2012ZX09303006—001). The screenings in Wenjiang were supported by the National Key Technology R&D Program of China (Grant No. 2009BAI80B01 and No. 2009BAI80B02) and Sichuan Provincial Science and Technology Foundation (Grant No. 150022 and No. 2015SZ0228).

### Data sharing statement

A supplementary profile will be available online which contains comprehensive figure and table of used input data. Inquiries about additional unpublished data could be contacted with the corresponding author.

### References

1. Xu Y, Wang L, He J, Bi Y, Li M, Wang T, Wang L, Jiang Y, Dai M, Lu J, Xu M, Li Y, Hu N, Li J, Mi S, Chen CS, Li G, Mu Y, Zhao J, Kong L, Chen J, Lai S, Wang W, Zhao W, Ning G; 2010 China Noncommunicable Disease Surveillance Group. Prevalence and Control of Diabetes in Chinese Adults. *JAMA*. 2013; 310 (9): 948-958.
2. Yang W, Lu J, Weng J, Jia W, Ji L, Xiao J, Shan Z, Liu J, Tian H, Ji Q, Zhu D, Ge J, Lin L, Chen L, Guo X, Zhao Z, Li Q, Zhou Z, Shan G, He J; China National Diabetes and Metabolic Disorders Study Group. Prevalence of Diabetes among Men and Women in China. *N Engl J Med*. 2010; 362: 1090-101.
3. Rydén L, Grant PJ, Anker SD, Berne C, Cosentino F, Danchin N, Deaton C, Escaned J, Hammes HP, Huikuri H, Marre M, Marx N, Mellbin L, Ostergren J, Patrono C, Seferovic P, Uva MS, Taskinen MR, Tendera M, Tuomilehto J, Valensi P, Zamorano JL; ESC Committee for Practice Guidelines (CPG), Zamorano JL, Achenbach S, Baumgartner H, Bax JJ, Bueno H, Dean V, Deaton C, Erol C, Fagard R, Ferrari R, Hasdai D, Hoes AW, Kirchhof P, Knuuti J, Kolh P, Lancellotti P, Linhart A, Nihoyannopoulos P, Piepoli MF, Ponikowski P, Sirnes PA, Tamargo JL, Tendera M, Torbicki A, Wijns W, Windecker S; Document Reviewers, De Backer G, Sirnes PA, Ezquerra EA, Avogaro A, Badimon L, Baranova E, Baumgartner H, Betteridge

- J, Ceriello A, Fagard R, Funck-Brentano C, Gulba DC, Hasdai D, Hoes AW, Kjekshus JK, Knuuti J, Kolh P, Lev E, Mueller C, Neyses L, Nilsson PM, Perk J, Ponikowski P, Reiner Z, Sattar N, Schächinger V, Scheen A, Schirmer H, Strömberg A, Sudzhaeva S, Tamargo JL, Viigimaa M, Vlachopoulos C, Xuereb RG. ESC Guidelines on diabetes, pre-diabetes, and cardiovascular diseases developed in collaboration with the EASD. *European Heart Journal*. 2013; 34: 3035–3087.
4. Tanne D, Koren-Morag N, Goldbourt U. Fasting plasma glucose and risk of incident ischemic stroke or transient ischemic attacks: a prospective cohort study. *Stroke*. 2004; 35:2351-5.
  5. Norhammar A, Tenerz A, Nilsson G, Hamsten A, Efendic S, Rydén L, Malmberg K. Glucose metabolism in patients with acute myocardial infarction and no previous diagnosis of diabetes mellitus: a prospective study. *Lancet*. 2002; 359: 2140-4.
  6. Chinese Diabetes Society. China Guideline for Type 2 Diabetes. *Chinese Diabetes Society*. 2010. (Chinese)
  7. Chen L, Magliano DJ, Balkau B, Colagiuri S, Zimmet PZ, Tonkin AM, Mitchell P, Phillips PJ, Shaw JE. AUSDRISK: an Australian type 2 diabetes risk assessment tool based on demographic, lifestyle and simple anthropometric measures. *Medical Journal of Australia*. 2010; 192 (4): 197–202.
  8. Lindstrom J, Tuomilehto J. The diabetes risk score: a practical tool to predict type 2 diabetes risk. *Diabetes Care*. 2003; 26: (3)725–731.
  9. Mohan V, Sandeep S, Deepa M, Gokulakrishnan K, Datta M, Deepa R. A diabetes risk score helps identify metabolic syndrome and cardiovascular risk in Indians – the Chennai Urban Rural Epidemiology Study (CURES-38). *Diabetes, Obesity and Metabolism*. 2007; 9 (3): 337–343.
  10. Lu J, Bi Y, Wang T, Wang W, Mu Y, Zhao J, Liu C, Chen L, Shi L, Li Q, Wan Q, Wu S, Qin G, Yang T, Yan L, Liu Y, Wang G, Luo Z, Tang X, Chen G, Huo Y, Gao Z, Su Q, Ye Z, Wang Y, Deng H, Yu X, Shen F, Chen L, Zhao L, Dai M, Xu M, Xu Y, Chen Y, Lai S, Ning G. The relationship between insulin-sensitive obesity and cardiovascular diseases in a Chinese population: Results of the REACTION study. *International Journal of Cardiology*. 2014; 172: 388–394.
  11. Bi Y, Lu J, Wang W, Mu Y, Zhao J, Liu C, Chen L, Shi L, Li Q, Wan Q, Wu S, Yang T, Yan L, Liu Y, Wang G, Luo Z, Tang X, Chen G, Huo Y, Gao Z, Su Q, Ye Z, Wang Y, Qin G, Deng H, Yu X, Shen F, Chen L, Zhao L, Zhang J, Sun J, Dai M, Xu M, Xu Y, Chen Y, Lai S, Bloomgarden ZT, Li D, Ning G. Cohort profile: Risk evaluation of cancers in Chinese diabetic individuals: A longitudinal (REACTION) study. *J Diabetes*. 2014; 6 (2): 147–57.
  12. American Diabetes Association. Standards of medical care in diabetes–2010. *Diabetes Care*. 2011; 33 (Suppl. 1): S11–61.
  13. DeLong ER, DeLong DM, Clarke-Pearson DL. Comparing the areas under two or more correlated receiver operating characteristic curves: a nonparametric approach. *Biometrics*. 1988; 44 (3): 837-45.
  14. Hadaegh F, Derakhshan A, Zafari N, Khalili D, Mirbolouk M, Saadat N, Azizi F. Pre-diabetes tsunami: incidence rates and risk factors of pre-diabetes and its different phenotypes over 9 years of follow-up. *Diabet Med*. 2017; 34 (1): 69-78.



15. Lyssenko V, Almgren P, Anevski D, Perfekt R, Lahti K, Nissén M, Isomaa B, Forsen B, Homström N, Saloranta C, Taskinen MR, Groop L, Tuomi T, Botnia study group. Predictors of and longitudinal changes in insulin sensitivity and secretion preceding onset of type 2 diabetes. *Diabetes*. 2005; 54 (1):166-74.
16. Xu Z, Qi X, Dahl AK, Xu W. Waist-to-height ratio is the best indicator for undiagnosed type 2 diabetes. *Diabet Med*. 2013; 30 (6):e201-7.
17. Hu D, Xie J, Fu P, Zhou J, Yu D, Whelton PK, He J, Gu D. Central rather than overall obesity is related to diabetes in the Chinese population: the InterASIA study. *Obesity (Silver Spring)*. 2007 Nov; 15 (11):2809-16.
18. Jung SH, Ha KH, Kim DJ. Visceral fat mass has stronger associations with diabetes and prediabetes than other anthropometric obesity indicators among Korean adults. *Yonsei Med J*. 2016 May; 57 (3):674-80.
19. Hayashi T, Boyko EJ, Leonetti DL, McNeely MJ, Newell-Morris L, Kahn SE, Fujimoto WY. Visceral adiposity and the risk of impaired glucose tolerance: a prospective study among Japanese Americans. *Diabetes Care*. 2003; 26 (3):650-5.
20. Alperet DJ, Lim WY, Mok-Kwee Heng D, Ma S, van Dam RM. Optimal anthropometric measures and thresholds to identify undiagnosed type 2 diabetes in three major Asian ethnic groups. *Obesity (Silver Spring)*. 2016 Oct; 24 (10):2185-93.
21. Nathan DM, Davidson MB, DeFronzo RA, Heine RJ, Henry RR, Pratley R, Zinman B, American Diabetes Association. Impaired fasting glucose and impaired glucose tolerance: implications for care. *Diabetes Care*. 2007 Mar; 30 (3):753-9.
22. Huang L, Tong Y, Zhang F, Yang Q, Li D, Xie S, Li Y, Cao H, Tang L, Zhang X, Tong N. Increased acyl ghrelin but decreased total ghrelin and unacyl ghrelin in Chinese Han people with impaired fasting glucose combined with impaired glucose tolerance. *Peptides*. 2014 Oct; 60:86-94.
23. Lü Q, Tong N, Liu Y, Li N, Tang X, Zhao J, Cao H, Li D, Gou L, Zhang Y, Wan J, Jiang L. Community-based population data indicates the significant alterations of insulinresistance , chronic inflammation and urine ACR in IFG combined IGT group amongprediabetic population. *Diabetes Res Clin Pract*. 2009 Jun; 84 (3):319-24.
24. Zhang F, Tang X, Cao H, Lü Q, Li N, Liu Y, Zhang X, Zhang Y, Cao M, Wan J, An Z, Tong N. Impaired secretion of total glucagon-like peptide-1 in people with impaired fasting glucose combined impaired glucose tolerance. *Int J Med Sci*. 2012; 9 (7):574-81.
25. Tulloch-Reid MK, Williams DE, Looker HC, Hanson RL, Knowler WC. Do measures of body fat distribution provide information on the risk of type 2 diabetes in addition to measures of general obesity? Comparison of anthropometric predictors of type 2 diabetes in Pima Indians. *Diabetes Care*. 2003 Sep; 26 (9):2556-61.
26. Chei CL, Iso H, Yamagishi K, Tanigawa T, Cui R, Imano H, Kiyama M, Kitamura A, Sato S, Shimamoto T. Body fat distribution and the risk of hypertension and diabetes among Japanese men and women. *Hypertens Res*. 2008 May; 31 (5):851-7.
27. MacKay MF, Haffner SM, Wagenknecht LE, D'Agostino RB Jr, Hanley AJ. Prediction of type 2 diabetes using alternate anthropometric measures in a multi-ethnic

- 1  
2  
3 cohort: the insulin resistance atherosclerosis study. *Diabetes Care*. 2009 May; 32  
4 (5):956-8.  
5  
6 28. Son YJ, Kim J, Park HJ, Park SE, Park CY, Lee WY, Oh KW, Park SW, Rhee EJ.  
7 Association of Waist-Height Ratio with Diabetes Risk: A 4-Year Longitudinal  
8 Retrospective Study. *Endocrinol Metab (Seoul)*. 2016 Mar; 31 (1):127-33.  
9  
10 29. Xu F, Wang YF, Lu L, Liang Y, Wang Z, Hong X, Li J. Comparison of anthropometric  
11 indices of obesity in predicting subsequent risk of hyperglycemia among Chinese men  
12 and women in Mainland China. *Asia Pac J Clin Nutr*. 2010; 19 (4):586-93.  
13  
14 30. Browning LM, Hsieh SD, Ashwell M. A systematic review of waist-to-height ratio as a  
15 screening tool for the prediction of cardiovascular disease and diabetes: 0.5 could be a  
16 suitable global boundary value. *Nutrition Research Reviews*. 2010; 23: 247–269.  
17  
18  
19  
20  
21  
22  
23  
24  
25  
26  
27  
28  
29  
30  
31  
32  
33  
34  
35  
36  
37  
38  
39  
40  
41  
42  
43  
44  
45  
46  
47  
48  
49  
50  
51  
52  
53  
54  
55  
56  
57  
58  
59  
60

Table 1. General measurements of subjects at baseline who progressed to hyperglycemia at follow-up

|                                     | NGT<br>(n = 972)             | Isolated IFG<br>(n = 159)  | Isolated IGT<br>(n = 342)   | IFG+IGT<br>(n = 152)       | NDDM<br>(n = 260)            | overall <i>P</i><br>value |
|-------------------------------------|------------------------------|----------------------------|-----------------------------|----------------------------|------------------------------|---------------------------|
| Follow-up time (year)               | 3.00 (2.92—4.17)‡            | 3.00 (2.92—4.17)‡          | 2.92 (2.92—3.17)*†          | 3.00 (2.92—3.17)           | 3.00 (2.92—3.17)             | 0.000                     |
| Age (year)                          | 53 (46—59)†‡§¶               | 55 (48—62)*¶               | 59 (49—65)*                 | 56 (49—62)*¶               | 60 (54—65)*†§                | 0.000                     |
| Female (N/n%)                       | 675 (69.44%)                 | 96 (60.38%)                | 220 (64.33%)                | 97 (63.82%)                | 166 (63.85%)                 | 0.075                     |
| Height (cm)                         | 158.00<br>(153.10—164.00)    | 159.45<br>(154.00—165.52)  | 157.00<br>(152.00—162.70)   | 157.10<br>(154.00—164.00)  | 156.00<br>(152.00—163.20)    | 0.492                     |
| Weight (kg)                         | 58.00 (52.00—65.00)          | 60.50 (53.99—66.85)        | 60.00 (53.00—66.20)         | 62.10 (56.70—69.50)        | 62.00 (55.00—69.75)          | 0.498                     |
| Hip circumference (cm)              | 93.00 (88.20—97.20)          | 94.00 (90.00—99.00)        | 95.00 (90.20—100.00)        | 96.00<br>(92.00—100.30)    | 96.00 (92.00—101.00)         | 0.879                     |
| SBP (mmHg)                          | 115.67<br>(105.33—128.67)‡§¶ | 118.50<br>(107.46—133.00)¶ | 122.50<br>(109.33—136.67)*¶ | 123.00<br>(114.00—137.67)* | 130.67<br>(118.67—142.17)*†‡ | 0.000                     |
| DBP (mmHg)                          | 74.33 (68.00—81.33)§¶        | 77.00 (70.00—83.75)        | 76.33 (69.00—83.33)¶        | 77.50<br>(72.33—82.67)*    | 79.00 (72.33—88.17)*‡        | 0.000                     |
| FPG (mmol/L)                        | 5.08 (4.83—5.29)†§¶          | 5.20 (4.98—5.38)*          | 5.11 (4.90—5.33)            | 5.16 (4.93—5.36)*          | 5.16 (4.92—5.36)*            | 0.000                     |
| 2hPG (mmol/L)                       | 6.15 (5.40—6.88)‡§           | 6.14 (5.45—6.93)           | 6.40 (5.67—7.09)*           | 6.54 (5.85—7.10)*          | 6.33 (5.50—7.08)             | 0.000                     |
| HbA1c (%)                           | 5.60 (5.30—5.90)‡§¶          | 5.70 (5.48—5.90)           | 5.70 (5.40—5.90)*           | 5.70 (5.50—6.00)*          | 5.70 (5.40—6.00)*            | 0.000                     |
| TG (mmol/L)                         | 1.10 (0.80—1.60)             | 1.12 (0.80—1.63)           | 1.11 (0.84—1.59)            | 1.14 (0.89—1.60)           | 1.07 (0.81—1.50)             | 0.494                     |
| TC (mmol/L)                         | 4.46 ± 1.01                  | 4.45 ± 1.17                | 4.50 ± 1.02                 | 4.72 ± 1.14                | 4.52 ± 1.10                  | 0.062                     |
| HDL-c (mmol/L)                      | 1.32 (1.09—1.60)             | 1.32 (1.05—1.52)           | 1.30 (1.08—1.56)            | 1.36 (1.20—1.57)           | 1.31 (1.09—1.60)             | 0.376                     |
| LDL-c (mmol/L)                      | 2.51 (2.04—3.03)             | 2.44 (1.97—3.09)           | 2.53 (1.99—2.99)            | 2.65 (2.06—3.17)           | 2.45 (1.95—3.01)             | 0.688                     |
| Family history of diabetes<br>(N/%) | 119 (12.24%)                 | 12 (7.55%)                 | 29 (8.48%)                  | 18 (11.84%)                | 29 (11.15%)                  | 0.214                     |
| Current smoker (N/%)                | 137 (14.10%)                 | 28 (17.61%)                | 42 (12.28%)                 | 18 (11.84%)                | 44 (16.92%)                  | 0.307                     |
| Physical activity (N/%)             | 719 (73.97%)                 | 107 (67.30%)               | 255 (74.56%)                | 113 (74.34%)               | 195 (75.00%)                 | 0.435                     |

1  
2  
3  
4  
5  
6  
7 NGT, normal glucose tolerance; IFG, impaired fasting glucose; IGT, impaired glucose tolerance; IFG+IGT, IFG combined with IGT; NDDM, newly-diagnosed  
8 diabetes mellitus; SBP, systolic blood pressure; DBP, diastolic blood pressure; FPG, fasting plasma glucose; 2hPG, 2 hour plasma glucose (after oral glucose  
9 tolerance test); TG, triglyceride; TC, total cholesterol; HDL-c, high-density lipoprotein cholesterol; LDL-c, low-density lipoprotein cholesterol.

10 Data are expressed as means  $\pm$  SD or median (interquartile range) or N (%).

11 Chi-square test was used to compare gender compositions, family history of diabetes, current smoking status and physical activity among five groups. If needed,  
12 chi-square segmentation was applied for further comparisons between any two subgroups with an adjusted significance level ( $\alpha = 0.005$ ).

13 Kruskal-Wallis H analysis was applied for follow-up time among five groups. Mann-Whitney U analysis was performed for comparison within any two subgroups  
14 additionally ( $\alpha = 0.005$ ).

15 One-way ANOVA analysis was used for the rest measurements among five groups, while LSD analysis was applied for age, SBP, DBP, FPG, 2hPG and HbA1c  
16 comparisons between any two subgroups ( $\alpha = 0.005$ ).

17  
18 \*, versus NGT and  $P < 0.005$ ; †, versus isolated IFG and  $P < 0.005$ ; ‡, versus isolated IGT and  $P < 0.005$ ; §, versus IFG+IGT and  $P < 0.005$ ; ¶, versus NDDM and  $P$   
19 < 0.005.  
20  
21  
22  
23  
24  
25  
26  
27  
28  
29  
30  
31  
32  
33  
34  
35  
36  
37  
38  
39  
40  
41  
42  
43  
44  
45  
46  
47

Table 2. Baseline and follow-up anthropometric values in participants who developed hyperglycemic disorders

|                             | NGT<br>(n = 972)        | Isolated IFG<br>(n = 159) | Isolated IGT<br>(n = 342) | IFG+IGT<br>(n = 152)      | NDDM<br>(n = 260)         | overall <i>P</i><br>value |
|-----------------------------|-------------------------|---------------------------|---------------------------|---------------------------|---------------------------|---------------------------|
| At follow-up survey         |                         |                           |                           |                           |                           |                           |
| WHtR (cm/cm)                | 0.51 (0.47—0.55)‡§¶     | 0.52 (0.48—0.56)§¶        | 0.53 (0.49—0.57)*§¶       | 0.54 (0.51—0.59)*†‡       | 0.56 (0.52—0.60)*†‡       | 0.000                     |
| BMI (kg/m <sup>2</sup> )    | 23.46 (21.77—25.53)†‡§¶ | 24.27 (22.49—26.17)*¶     | 24.44 (22.63—26.50)*¶     | 25.09 (23.62—27.01)*      | 25.73<br>(23.29—27.82)*†‡ | 0.000                     |
| Waist circumference<br>(cm) | 80.65 (74.00—87.00)†‡§¶ | 82.80 (77.00—91.00)*§¶    | 84.00<br>(78.00—90.00)*§¶ | 86.70<br>(80.28—93.00)*†‡ | 88.00<br>(82.00—95.00)*†‡ | 0.000                     |
| WHR (cm/cm)                 | 0.86 (0.81—0.91)†‡§¶    | 0.88 (0.84—0.92)*¶        | 0.88 (0.83—0.92)*¶        | 0.90 (0.86—0.94)*         | 0.91 (0.87—0.95)*†‡       | 0.000                     |
| At baseline survey          |                         |                           |                           |                           |                           |                           |
| WHtR (cm/cm)                | 0.50 ± 0.05†‡§¶         | 0.52 ± 0.06*§¶            | 0.53 ± 0.05*¶             | 0.54 ± 0.05*†             | 0.55 ± 0.06*†‡            | 0.000                     |
| BMI (kg/m <sup>2</sup> )    | 23.03 (21.23—25.16)†‡§¶ | 23.31 (21.56—25.64)¶      | 24.03 (22.10—26.22)*      | 24.98 (23.47—26.67)*      | 25.42 (23.17—27.22)*†     | 0.000                     |
| Waist circumference<br>(cm) | 79.00 (73.00—86.00)     | 82.00 (76.00—89.00)       | 83.00 (77.10—89.00)       | 87.00 (81.00—91.28)       | 86.00 (80.00—93.00)       | 0.282                     |
| WHR (cm/cm)                 | 0.86 (0.81—0.90)¶       | 0.87 (0.92—0.92)          | 0.87 (0.82—0.91)          | 0.89 (0.86—0.93)          | 0.90 (0.86—0.94)*         | 0.010                     |

NGT, normal glucose tolerance; IFG, impaired fasting glucose; IGT, impaired glucose tolerance; IFG+IGT, IFG combined with IGT; NDDM, newly-diagnosed diabetes mellitus; WHtR, waist-to-height ratio; BMI, body mass index; WHR, waist-to-hip ratio.

Data are expressed as median (interquartile range) or means ± SD.

At follow-up survey: One-way ANOVA analysis was used for WHtR, BMI and WC among the five glucose metabolic groups. LSD analysis was applied for the further comparisons between any two subgroups (*a*' = 0.005). Kruskal-Wallis H analysis was applied for WHR among the five groups and Mann-Whitney U analysis was performed for the following comparisons within any two subgroups (*a*' = 0.005).

At baseline survey: One-way ANOVA analysis was used for all indices among the five glucose metabolic groups. LSD analysis was applied for WHtR, BMI and WHR between any two subgroups' comparison (*a*' = 0.005).

\*, versus NGT and *P* < 0.005; †, versus isolated IFG and *P* < 0.005; ‡, versus isolated IGT and *P* < 0.005; §, versus IFG+IGT and *P* < 0.005; ¶, versus NDDM and *P*

1  
2  
3  
4  
5  
6  
7  
8  
9  
10  
11  
12  
13  
14  
15  
16  
17  
18  
19  
20  
21  
22  
23  
24  
25  
26  
27  
28  
29  
30  
31  
32  
33  
34  
35  
36  
37  
38  
39  
40  
41  
42  
43  
44  
45  
46  
47

< 0.005.

For peer review only

1  
2  
3  
4  
5  
6  
7  
8  
9  
10  
11  
12  
13  
14  
15  
16  
17  
18  
19  
20  
21  
22  
23  
24  
25  
26  
27  
28  
29  
30  
31  
32  
33  
34  
35  
36  
37  
38  
39  
40  
41  
42  
43  
44  
45  
46  
47

Table 3. ROC curve analysis of baseline anthropometric indices for predicting future hyperglycemia

|                          | AUC   | SE    | P value | 95%CI         | Cut-off point | Youden's value | Sensitivity | Specificity | DeLong's test (P value) |                          |                          |             |
|--------------------------|-------|-------|---------|---------------|---------------|----------------|-------------|-------------|-------------------------|--------------------------|--------------------------|-------------|
|                          |       |       |         |               |               |                |             |             | WHtR (cm/cm)            | BMI (kg/m <sup>2</sup> ) | Waist circumference (cm) | WHR (cm/cm) |
| Isolated IFG             |       |       |         |               |               |                |             |             |                         |                          |                          |             |
| WHtR (cm/cm)             | 0.578 | 0.025 | 0.002   | (0.529—0.626) | 0.51          | 0.151          | 54.90%      | 60.19%      | —                       | 0.010                    | 0.201                    | 0.611       |
| BMI (kg/m <sup>2</sup> ) | 0.544 | 0.025 | 0.081   | (0.495—0.593) | 21.36         | 0.078          | 80.40%      | 27.43%      | 0.010                   | —                        | 0.023                    | 0.421       |
| Waist circumference (cm) | 0.592 | 0.024 | 0.000   | (0.545—0.639) | 77.10         | 0.148          | 71.24%      | 43.54%      | 0.201                   | 0.023                    | —                        | 0.195       |
| Women                    | 0.584 | 0.031 | 0.010   | (0.524—0.644) | 75.00         | 0.166          | 74.44%      | 42.11%      | —                       | —                        | —                        | —           |
| Men                      | 0.579 | 0.041 | 0.050   | (0.526—0.631) | 87.00         | 0.165          | 49.21%      | 67.24%      | —                       | —                        | —                        | —           |
| WHR (cm/cm)              | 0.567 | 0.026 | 0.008   | (0.537—0.597) | 0.88          | 0.128          | 47.06%      | 65.71%      | 0.611                   | 0.421                    | 0.195                    | —           |
| Women                    | 0.568 | 0.033 | 0.036   | (0.504—0.632) | 0.85          | 0.140          | 57.78%      | 56.19%      | —                       | —                        | —                        | —           |
| Men                      | 0.525 | 0.042 | 0.534   | (0.471—0.578) | 0.90          | 0.095          | 53.97%      | 55.52%      | —                       | —                        | —                        | —           |
| Isolated IGT             |       |       |         |               |               |                |             |             |                         |                          |                          |             |
| WHtR (cm/cm)             | 0.634 | 0.017 | 0.000   | (0.600—0.667) | 0.51          | 0.214          | 62.24%      | 59.12%      | —                       | 0.003                    | 0.006                    | 0.000       |

1  
2  
3  
4  
5  
6  
7  
8  
9  
10  
11  
12  
13  
14  
15  
16  
17  
18  
19  
20  
21  
22  
23  
24  
25  
26  
27  
28  
29  
30  
31  
32  
33  
34  
35  
36  
37  
38  
39  
40  
41  
42  
43  
44  
45  
46  
47

|                          |       |       |       |               |       |       |        |        |       |       |       |       |
|--------------------------|-------|-------|-------|---------------|-------|-------|--------|--------|-------|-------|-------|-------|
| BMI (kg/m <sup>2</sup> ) | 0.591 | 0.018 | 0.000 | (0.556—0.627) | 22.68 | 0.155 | 68.88% | 46.64% | 0.003 | —     | 0.178 | 0.223 |
| Waist circumference (cm) | 0.610 | 0.017 | 0.000 | (0.576—0.645) | 78.00 | 0.197 | 71.90% | 47.81% | 0.006 | 0.178 | —     | 0.001 |
| Women                    | 0.635 | 0.021 | 0.000 | (0.593—0.676) | 78.00 | 0.260 | 68.42% | 57.59% | —     | —     | —     | —     |
| Men                      | 0.542 | 0.032 | 0.174 | (0.480—0.605) | 87.80 | 0.132 | 43.44% | 69.76% | —     | —     | —     | —     |
| WHR (cm/cm)              | 0.567 | 0.018 | 0.000 | (0.539—0.594) | 0.86  | 0.123 | 61.63% | 50.64% | 0.000 | 0.223 | 0.001 | —     |
| Women                    | 0.587 | 0.022 | 0.000 | (0.544—0.630) | 0.82  | 0.154 | 77.03% | 38.39% | —     | —     | —     | —     |
| Men                      | 0.524 | 0.032 | 0.433 | (0.463—0.586) | 0.89  | 0.098 | 57.38% | 52.41% | —     | —     | —     | —     |
| IFG+IGT                  |       |       |       |               |       |       |        |        |       |       |       |       |
| WHtR (cm/cm)             | 0.713 | 0.022 | 0.000 | (0.670—0.755) | 0.53  | 0.351 | 62.33% | 72.79% | —     | 0.106 | 0.556 | 0.026 |
| BMI (kg/m <sup>2</sup> ) | 0.685 | 0.022 | 0.000 | (0.642—0.729) | 23.38 | 0.316 | 77.40% | 54.22% | 0.106 | —     | 0.254 | 0.492 |
| Waist circumference (cm) | 0.706 | 0.021 | 0.000 | (0.665—0.748) | 79.80 | 0.351 | 82.88% | 52.19% | 0.556 | 0.254 | —     | 0.032 |
| Women                    | 0.732 | 0.026 | 0.000 | (0.682—0.783) | 79.80 | 0.420 | 79.57% | 62.38% | —     | —     | —     | —     |
| Men                      | 0.656 | 0.039 | 0.000 | (0.579—0.733) | 90.30 | 0.242 | 43.40% | 80.76% | —     | —     | —     | —     |



1  
2  
3  
4  
5  
6  
7  
8  
9  
10  
11  
12  
13  
14  
15  
16  
17  
18  
19  
20  
21  
22  
23  
24  
25  
26  
27  
28  
29  
30  
31  
32  
33  
34  
35  
36  
37  
38  
39  
40  
41  
42  
43  
44  
45  
46  
47

|                          |       |       |       |               |       |       |        |        |       |       |       |       |  |
|--------------------------|-------|-------|-------|---------------|-------|-------|--------|--------|-------|-------|-------|-------|--|
| WHR (cm/cm)              | 0.667 | 0.022 | 0.000 | (0.638—0.695) | 0.87  | 0.274 | 69.18% | 58.23% | 0.026 | 0.492 | 0.032 | —     |  |
| Women                    | 0.686 | 0.027 | 0.000 | (0.633—0.739) | 0.83  | 0.312 | 86.02% | 45.20% | —     | —     | —     | —     |  |
| Men                      | 0.631 | 0.038 | 0.003 | (0.556—0.705) | 0.92  | 0.261 | 54.72% | 71.38% | —     | —     | —     | —     |  |
| NDDM                     |       |       |       |               |       |       |        |        |       |       |       |       |  |
| WHtR (cm/cm)             | 0.730 | 0.017 | 0.000 | (0.696—0.764) | 0.52  | 0.366 | 74.21% | 62.43% | —     | 0.000 | 0.001 | 0.010 |  |
| BMI (kg/m <sup>2</sup> ) | 0.677 | 0.020 | 0.000 | (0.639—0.716) | 24.32 | 0.315 | 64.68% | 66.81% | 0.000 | —     | 0.093 | 0.596 |  |
| Waist circumference (cm) | 0.700 | 0.018 | 0.000 | (0.665—0.735) | 78.00 | 0.292 | 81.35% | 47.81% | 0.001 | 0.093 | —     | 0.429 |  |
| Women                    | 0.714 | 0.021 | 0.000 | (0.673—0.756) | 77.10 | 0.344 | 81.76% | 52.63% | —     | —     | —     | —     |  |
| Men                      | 0.686 | 0.033 | 0.000 | (0.622—0.750) | 88.00 | 0.298 | 56.99% | 72.85% | —     | —     | —     | —     |  |
| WHR (cm/cm)              | 0.688 | 0.018 | 0.000 | (0.661—0.715) | 0.88  | 0.304 | 67.73% | 62.71% | 0.010 | 0.596 | 0.429 | —     |  |
| Women                    | 0.696 | 0.022 | 0.000 | (0.653—0.738) | 0.84  | 0.301 | 79.75% | 50.31% | —     | —     | —     | —     |  |
| Men                      | 0.681 | 0.030 | 0.000 | (0.622—0.740) | 0.92  | 0.299 | 60.22% | 69.66% | —     | —     | —     | —     |  |

ROC, receiver operating characteristic; IFG, impaired fasting glucose; IGT, impaired glucose tolerance; IFG+IGT, IFG combined with IGT; NDDM, newly-diagnosed diabetes mellitus; AUC, area under curve; SE, standard error; CI, confidence interval; WHtR, waist-to-height ratio; BMI, body mass index; WHR,

1  
2  
3  
4  
5  
6  
7  
8  
9  
10  
11  
12  
13  
14  
15  
16  
17  
18  
19  
20  
21  
22  
23  
24  
25  
26  
27  
28  
29  
30  
31  
32  
33  
34  
35  
36  
37  
38  
39  
40  
41  
42  
43  
44  
45  
46  
47

waist-to-hip ratio.

For peer review only

1  
2  
3  
4  
5  
6  
7  
8  
9  
10  
11  
12  
13  
14  
15  
16  
17  
18  
19  
20  
21  
22  
23  
24  
25  
26  
27  
28  
29  
30  
31  
32  
33  
34  
35  
36  
37  
38  
39  
40  
41  
42  
43  
44  
45  
46  
47

Table 4. Multivariate analysis of baseline anthropometric indices with respect to risk of subsequent pre-diabetes and NDDM

|                          | Isolated IFG |               |       | Isolated IGT |               |       | IFG+IGT |               |       | NDDM  |               |       |
|--------------------------|--------------|---------------|-------|--------------|---------------|-------|---------|---------------|-------|-------|---------------|-------|
|                          | HR           | 95% CI        | P     | HR           | 95% CI        | P     | HR      | 95% CI        | P     | HR    | 95% CI        | P     |
| WHtR (cm/cm)             | 1.471        | (0.901—2.402) | 0.123 | 1.951        | (1.550—2.457) | 0.000 | 3.002   | (2.137—4.216) | 0.000 | 2.765 | (2.065—3.703) | 0.000 |
| BMI (kg/m <sup>2</sup> ) | 1.186        | (0.699—2.012) | 0.526 | 1.571        | (1.241—1.988) | 0.000 | 3.298   | (2.224—4.892) | 0.000 | 2.305 | (1.773—2.998) | 0.000 |
| Waist circumference (cm) | 1.603        | (1.112—2.310) | 0.011 | 1.644        | (1.275—2.118) | 0.000 | 4.570   | (2.948—7.084) | 0.000 | 2.666 | (1.886—3.769) | 0.000 |
| WHR (cm/cm)              | 1.182        | (0.739—1.889) | 0.486 | 0.972        | (0.724—1.304) | 0.848 | 1.571   | (1.003—2.465) | 0.048 | 1.706 | (1.196—2.433) | 0.003 |

NDDM, newly-diagnosed diabetes mellitus; IFG, impaired fasting glucose; IGT, impaired glucose tolerance; IFG+IGT, IFG combined with IGT; HR, hazard ratio; CI, confidence interval; WHtR, waist-to-height ratio; BMI, body mass index; WHR, waist-to-hip ratio.

Cox proportional hazards models were used to calculate HR and 95% CI. A univariate analysis was performed for each potential risk factor firstly, including age (years), gender (male/female), systolic blood pressure (mmHg), diastolic blood pressure (mmHg), fasting plasma glucose (mmol/L), 2 hour plasma glucose (mmol/L) (after oral glucose tolerance test), HbA1c (%), total cholesterol (mmol/L), triglyceride (mmol/L), high-density lipoprotein cholesterol (mmol/L), low-density lipoprotein cholesterol (mmol/L), diabetes family history (yes/no), current smoking status (yes/no), physical activity situation (yes/no), WHtR (low/high), BMI (low/high), WC (low/high) and WHR (low/high). The four anthropometric indicators were dichotomized into low or high level by using cut-off values derived from previous ROC curve analysis. Then those risk factors with a P-value < 0.2 in univariate analysis were selected to enter the multivariate model.

1  
2  
3 Figure legends  
4

5 Figure 1. ROC curves of baseline anthropometric indices in subjects who developed (A)  
6 isolated IFG, (B) isolated IGT, (C) IFG+IGT and (D) NDDM. ROC, receiver operating  
7 characteristic; IFG, impaired fasting glucose; IGT, impaired glucose tolerance; IFG+IGT, IFG  
8 combined with IGT; NDDM, newly-diagnosed diabetes mellitus; WHtR, waist-to-height ratio;  
9 BMI, body mass index; WHR, waist-to-hip ratio; WC, waist circumference.  
10  
11

12 Supplemental Figure 1. Flow-chart of study design. NGT, normal glyceic tolerance; OGTT,  
13 oral glucose tolerance test; NDDM, newly-diagnosed diabetes mellitus. The re-visited  
14 participants in the blue background came from the baseline populations; the subjects in the  
15 pink background were the ones recruited in this study, who were normoglycemic at baseline.  
16  
17

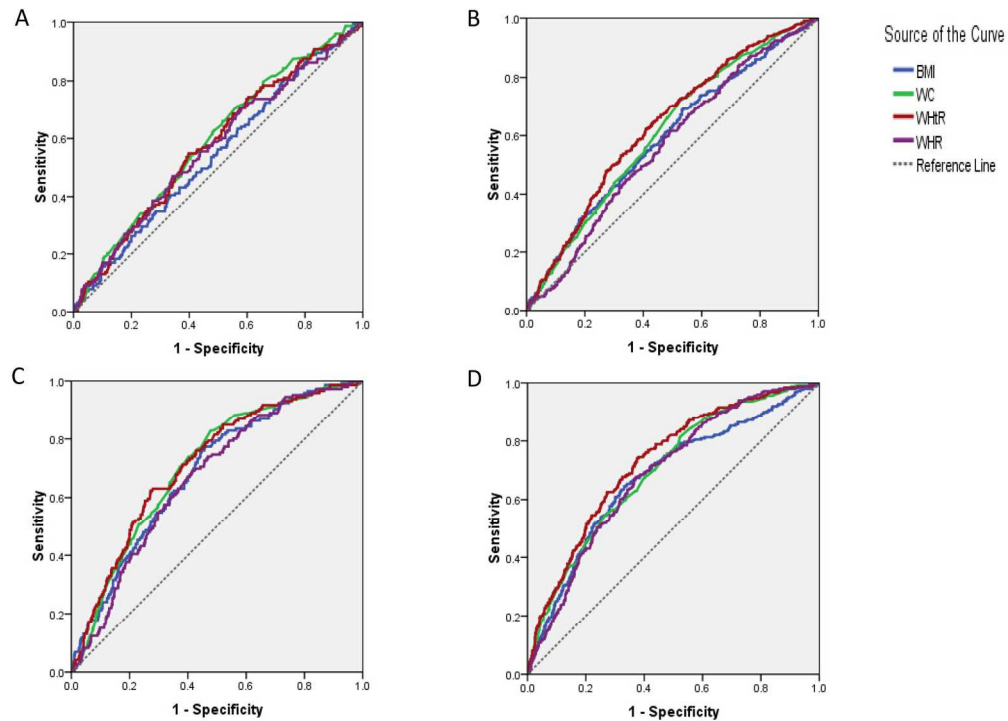

Figure 1. ROC curves of baseline anthropometric indices in subjects who developed (A) isolated IFG, (B) isolated IGT, (C) IFG+IGT and (D) NDDM. ROC, receiver operating characteristic; IFG, impaired fasting glucose; IGT, impaired glucose tolerance; IFG+IGT, IFG combined with IGT; NDDM, newly-diagnosed diabetes mellitus; WHtR, waist-to-height ratio; BMI, body mass index; WHR, waist-to-hip ratio; WC, waist circumference.

158x114mm (300 x 300 DPI)

Supplemental Table 1. Baseline characteristics of all the participants screened in Luzhou and Wenjiang

|                                    | Luzhou baseline survey |                        |                        | <i>P</i> | Wenjiang baseline survey |                     |                     | <i>P</i> |
|------------------------------------|------------------------|------------------------|------------------------|----------|--------------------------|---------------------|---------------------|----------|
|                                    | Total (n = 1582)       | Men (n = 495)          | Women (n = 1087)       |          | Total (n = 303)          | Men (n = 154)       | Women (n = 149)     |          |
| Age (year)                         | 57 (50—63)             | 60 (54—66)             | 56 (49—61)             | 0.000    | 47 (43—54)               | 47 (43—54)          | 46 (42—52)          | 0.161    |
| Female (N/n%)                      | 1087 (68.71%)          | —                      | —                      |          | 149 (49.17%)             | —                   | —                   |          |
| Height (cm)                        | 157.00 (152.40—163.00) | 165.00 (160.50—169.00) | 154.55 (151.00—158.20) | 0.180    | 161.28 ± 7.60            | 166.46 ± 5.27       | 155.56 ± 5.32       | 0.000    |
| Weight (kg)                        | 59.00 (53.00—65.30)    | 65.00 (58.30—72.00)    | 56.50 (51.20—62.50)    | 0.000    | 61.88 ± 11.36            | 67.66 ± 8.84        | 55.49 ± 10.38       | 0.000    |
| Hip circumference (cm)             | 94.00 (89.20—99.00)    | 95.00 (90.00—100.00)   | 94.00 (89.00—98.20)    | 0.655    | 93.47 ± 6.04             | 95.01 ± 5.43        | 91.76 ± 6.24        | 0.000    |
| SBP (mmHg)                         | 120.67 (108.67—135.67) | 126.00 (113.83—140.17) | 119.00 (107.00—133.37) | 0.000    | 114.90 ± 14.27           | 118.20 ± 14.02      | 111.26 ± 13.69      | 0.000    |
| DBP (mmHg)                         | 75.33 (69.00—82.67)    | 79.00 (71.67—88.17)    | 74.00 (68.00—80.67)    | 0.000    | 78.40 ± 16.26            | 81.15 ± 10.84       | 75.36 ± 20.27       | 0.001    |
| FPG (mmol/L)                       | 5.14 (4.93—5.34)       | 5.15 (4.96—5.38)       | 5.13 (4.92—5.32)       | 0.011    | 4.90 (4.60—5.10)         | 4.90 (4.70—5.20)    | 4.80 (4.60—5.10)    | 0.286    |
| 2hPG (mmol/L)                      | 6.32 (5.57—7.00)       | 6.32 (5.57—6.98)       | 6.32 (5.57—7.01)       | 0.777    | 6.00 (5.00—6.70)         | 5.90 (5.03—5.78)    | 6.00 (5.00—6.80)    | 0.541    |
| HbA1c (%)                          | 5.70 (5.40—5.90)       | 5.70 (5.50—5.95)       | 5.70 (5.40—5.90)       | 0.069    | 5.48 ± 0.42              | 5.51 ± 0.38         | 5.45 ± 0.45         | 0.228    |
| TG (mmol/L)                        | 1.33 ± 0.94            | 1.29 ± 0.84            | 1.34 ± 0.98            | 0.388    | 1.10 (0.80—1.80)         | 1.50 (0.90—2.18)    | 0.90 (0.70—1.50)    | 0.000    |
| TC (mmol/L)                        | 4.44 (3.75—5.18)       | 4.32 (3.63—5.12)       | 4.50 (3.82—5.19)       | 0.017    | 4.53 ± 0.83              | 4.60 ± 0.82         | 4.45 ± 0.83         | 0.178    |
| HDL-c (mmol/L)                     | 1.28 (1.06—1.52)       | 1.26 (1.03—1.52)       | 1.29 (1.08—1.52)       | 0.107    | 1.59 ± 0.39              | 1.47 ± 0.32         | 1.71 ± 0.41         | 0.000    |
| LDL-c (mmol/L)                     | 2.52 ± 0.77            | 2.47 ± 0.74            | 2.54 ± 0.79            | 0.078    | 2.86 ± 0.75              | 2.92 ± 0.70         | 2.79 ± 0.80         | 0.252    |
| WHtR (cm/cm)                       | 0.52 (0.48—0.56)       | 0.53 (0.49—0.56)       | 0.52 (0.48—0.56)       | 0.900    | 0.49 (0.45—0.53)         | 0.50 (0.47—0.53)    | 0.47 (0.44—0.51)    | 0.000    |
| BMI (kg/m <sup>2</sup> )           | 23.74 (21.61—26.00)    | 24.04 (21.81—26.14)    | 23.68 (21.51—25.92)    | 0.462    | 23.49 (21.64—25.59)      | 24.40 (22.33—26.03) | 22.44 (21.10—24.24) | 0.000    |
| Waist circumference (cm)           | 82.00 (76.00—89.00)    | 87.00 (80.00—92.45)    | 80.00 (75.00—87.10)    | 0.201    | 79.00 (72.00—86.00)      | 84.00 (79.00—89.00) | 73.00 (69.75—78.00) | 0.000    |
| WHR (cm/cm)                        | 0.86 (0.80—0.91)       | 0.89 (0.83—0.94)       | 0.85 (0.79—0.90)       | 0.476    | 0.86 (0.80—0.91)         | 0.83 (0.78—0.89)    | 0.87 (0.81—0.92)    | 0.256    |
| Outcomes at follow-up: N/total (%) |                        |                        |                        |          |                          |                     |                     |          |
| NGT                                | 757 (47.85%)           | 203 (41.01%)           | 554 (50.97%)           | —        | 215 (70.96%)             | 103 (66.88%)        | 112 (75.17%)        | —        |
| Isolated IFG                       | 131 (8.28%)            | 51 (10.30%)            | 80 (7.34%)             | —        | 28 (9.24%)               | 12 (7.79%)          | 16 (10.74%)         | —        |
| Isolated IGT                       | 304 (19.22%)           | 103 (20.81%)           | 201 (18.49%)           | —        | 38 (12.54%)              | 24 (15.58%)         | 14 (9.40%)          | —        |
| IFG+IGT                            | 137 (8.66%)            | 46 (9.29%)             | 91 (8.37%)             | —        | 15 (4.95%)               | 11 (7.14%)          | 4 (2.68%)           | —        |

1  
2  
3  
4  
5  
6  
7  
8  
9  
10  
11  
12  
13  
14  
15  
16  
17  
18  
19  
20  
21  
22  
23  
24  
25  
26  
27  
28  
29  
30  
31  
32  
33  
34  
35  
36  
37  
38  
39  
40  
41  
42  
43  
44  
45  
46

|      |              |             |              |   |           |           |           |   |
|------|--------------|-------------|--------------|---|-----------|-----------|-----------|---|
| NDDM | 253 (15.99%) | 92 (18.59%) | 161 (14.81%) | — | 7 (2.31%) | 4 (2.61%) | 3 (2.01%) | — |
|------|--------------|-------------|--------------|---|-----------|-----------|-----------|---|

SBP, systolic blood pressure; DBP, diastolic blood pressure; FPG, fasting plasma glucose; 2hPG, 2 hour plasma glucose (after oral glucose tolerance test); TG, triglyceride; TC, total cholesterol; HDL-c, high-density lipoprotein cholesterol; LDL-c, low-density lipoprotein cholesterol; WHtR, waist-to-height ratio; BMI, body mass index; WHR, waist-to-hip ratio; NGT, normal glucose tolerance; IFG, impaired fasting glucose; IGT, impaired glucose tolerance; IFG+IGT, IFG combined with IGT; NDDM, newly-diagnosed diabetes mellitus.

Data are expressed as mean ±SD, or median (interquartile range), or N (%).

Mann-Whitney U analysis was used for DBP and BMI in Luzhou, TG and HDL-c in Wenjiang; one-way ANOVA analysis was used for the rest measurements in two surveys.

*P* value of men versus women.

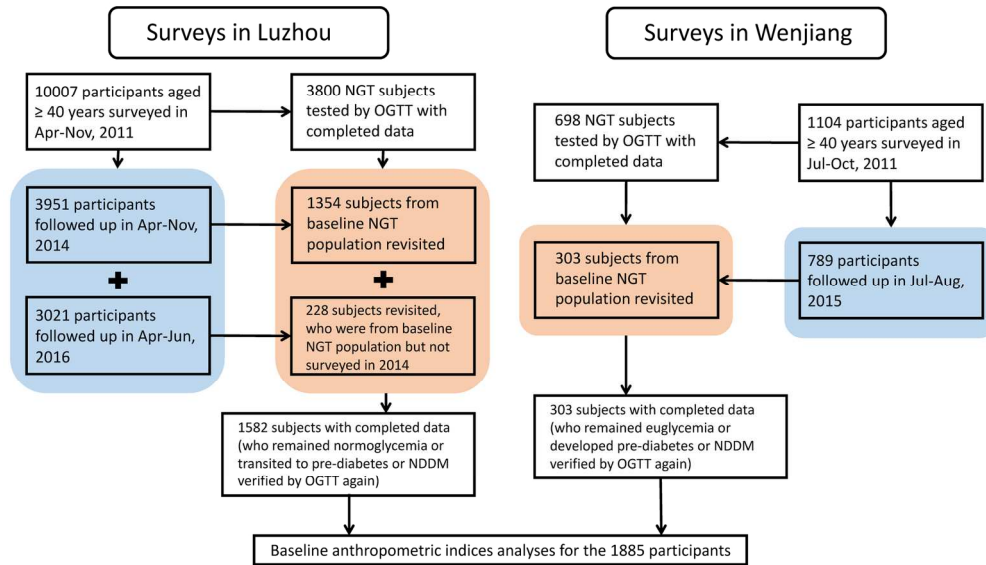

Supplemental Figure 1. Flow-chart of study design. NGT, normal glycemic tolerance; OGTT, oral glucose tolerance test; NDDM, newly-diagnosed diabetes mellitus. The re-visited participants in the blue background came from the baseline populations; the subjects in the pink background were the ones recruited in this study, who were normoglycemic at baseline.

165x94mm (300 x 300 DPI)



**STROBE 2007 (v4) checklist of items to be included in reports of observational studies in epidemiology\***  
**Checklist for cohort, case-control, and cross-sectional studies (combined)**

| Section/Topic             | Item # | Recommendation                                                                                                                                                                                                                                                                                                                                                                                                                                                         | Reported on page # |
|---------------------------|--------|------------------------------------------------------------------------------------------------------------------------------------------------------------------------------------------------------------------------------------------------------------------------------------------------------------------------------------------------------------------------------------------------------------------------------------------------------------------------|--------------------|
| Title and abstract        | 1      | (a) Indicate the study’s design with a commonly used term in the title or the abstract                                                                                                                                                                                                                                                                                                                                                                                 | 1, 2               |
|                           |        | (b) Provide in the abstract an informative and balanced summary of what was done and what was found                                                                                                                                                                                                                                                                                                                                                                    | 2                  |
| <b>Introduction</b>       |        |                                                                                                                                                                                                                                                                                                                                                                                                                                                                        |                    |
| Background/rationale      | 2      | Explain the scientific background and rationale for the investigation being reported                                                                                                                                                                                                                                                                                                                                                                                   | 4                  |
| Objectives                | 3      | State specific objectives, including any pre-specified hypotheses                                                                                                                                                                                                                                                                                                                                                                                                      | 4                  |
| <b>Methods</b>            |        |                                                                                                                                                                                                                                                                                                                                                                                                                                                                        |                    |
| Study design              | 4      | Present key elements of study design early in the paper                                                                                                                                                                                                                                                                                                                                                                                                                | 4, 5               |
| Setting                   | 5      | Describe the setting, locations, and relevant dates, including periods of recruitment, exposure, follow-up, and data collection                                                                                                                                                                                                                                                                                                                                        | 4, 5               |
| Participants              | 6      | (a) <i>Cohort study</i> —Give the eligibility criteria, and the sources and methods of selection of participants. Describe methods of follow-up<br><i>Case-control study</i> —Give the eligibility criteria, and the sources and methods of case ascertainment and control selection. Give the rationale for the choice of cases and controls<br><i>Cross-sectional study</i> —Give the eligibility criteria, and the sources and methods of selection of participants | 4, 5               |
|                           |        | (b) <i>Cohort study</i> —For matched studies, give matching criteria and number of exposed and unexposed<br><i>Case-control study</i> —For matched studies, give matching criteria and the number of controls per case                                                                                                                                                                                                                                                 | NA                 |
| Variables                 | 7      | Clearly define all outcomes, exposures, predictors, potential confounders, and effect modifiers. Give diagnostic criteria, if applicable                                                                                                                                                                                                                                                                                                                               | 5, 6               |
| Data sources/ measurement | 8*     | For each variable of interest, give sources of data and details of methods of assessment (measurement). Describe comparability of assessment methods if there is more than one group                                                                                                                                                                                                                                                                                   | 5, 6               |
| Bias                      | 9      | Describe any efforts to address potential sources of bias                                                                                                                                                                                                                                                                                                                                                                                                              | NA                 |
| Study size                | 10     | Explain how the study size was arrived at                                                                                                                                                                                                                                                                                                                                                                                                                              | 4, 5               |
| Quantitative variables    | 11     | Explain how quantitative variables were handled in the analyses. If applicable, describe which groupings were chosen and why                                                                                                                                                                                                                                                                                                                                           | 5, 6               |
| Statistical methods       | 12     | (a) Describe all statistical methods, including those used to control for confounding                                                                                                                                                                                                                                                                                                                                                                                  | 6                  |
|                           |        | (b) Describe any methods used to examine subgroups and interactions                                                                                                                                                                                                                                                                                                                                                                                                    | 6                  |
|                           |        | (c) Explain how missing data were addressed                                                                                                                                                                                                                                                                                                                                                                                                                            | 6                  |
|                           |        | (d) <i>Cohort study</i> —If applicable, explain how loss to follow-up was addressed<br><i>Case-control study</i> —If applicable, explain how matching of cases and controls was addressed                                                                                                                                                                                                                                                                              | 6                  |

|                          |     |                                                                                                                                                                                                              |       |
|--------------------------|-----|--------------------------------------------------------------------------------------------------------------------------------------------------------------------------------------------------------------|-------|
|                          |     | <i>Cross-sectional study</i> —If applicable, describe analytical methods taking account of sampling strategy                                                                                                 |       |
|                          |     | (e) Describe any sensitivity analyses                                                                                                                                                                        | NA    |
| <b>Results</b>           |     |                                                                                                                                                                                                              |       |
| Participants             | 13* | (a) Report numbers of individuals at each stage of study—eg numbers potentially eligible, examined for eligibility, confirmed eligible, included in the study, completing follow-up, and analysed            | 7     |
|                          |     | (b) Give reasons for non-participation at each stage                                                                                                                                                         | 5     |
|                          |     | (c) Consider use of a flow diagram                                                                                                                                                                           | 5     |
| Descriptive data         | 14* | (a) Give characteristics of study participants (eg demographic, clinical, social) and information on exposures and potential confounders                                                                     | 6     |
|                          |     | (b) Indicate number of participants with missing data for each variable of interest                                                                                                                          | NA    |
|                          |     | (c) <i>Cohort study</i> —Summarise follow-up time (eg, average and total amount)                                                                                                                             | 5     |
| Outcome data             | 15* | <i>Cohort study</i> —Report numbers of outcome events or summary measures over time                                                                                                                          | 6     |
|                          |     | <i>Case-control study</i> —Report numbers in each exposure category, or summary measures of exposure                                                                                                         | NA    |
|                          |     | <i>Cross-sectional study</i> —Report numbers of outcome events or summary measures                                                                                                                           | NA    |
| Main results             | 16  | (a) Give unadjusted estimates and, if applicable, confounder-adjusted estimates and their precision (eg, 95% confidence interval). Make clear which confounders were adjusted for and why they were included | 7, 8  |
|                          |     | (b) Report category boundaries when continuous variables were categorized                                                                                                                                    | 6-8   |
|                          |     | (c) If relevant, consider translating estimates of relative risk into absolute risk for a meaningful time period                                                                                             | 7, 8  |
| Other analyses           | 17  | Report other analyses done—eg analyses of subgroups and interactions, and sensitivity analyses                                                                                                               | NA    |
| <b>Discussion</b>        |     |                                                                                                                                                                                                              |       |
| Key results              | 18  | Summarise key results with reference to study objectives                                                                                                                                                     | 8     |
| Limitations              | 19  | Discuss limitations of the study, taking into account sources of potential bias or imprecision. Discuss both direction and magnitude of any potential bias                                                   | 9, 10 |
| Interpretation           | 20  | Give a cautious overall interpretation of results considering objectives, limitations, multiplicity of analyses, results from similar studies, and other relevant evidence                                   | 8-10  |
| Generalisability         | 21  | Discuss the generalisability (external validity) of the study results                                                                                                                                        | 10    |
| <b>Other information</b> |     |                                                                                                                                                                                                              |       |
| Funding                  | 22  | Give the source of funding and the role of the funders for the present study and, if applicable, for the original study on which the present article is based                                                | 10    |

\*Give information separately for cases and controls in case-control studies and, if applicable, for exposed and unexposed groups in cohort and cross-sectional studies.

**Note:** An Explanation and Elaboration article discusses each checklist item and gives methodological background and published examples of transparent reporting. The STROBE checklist is best used in conjunction with this article (freely available on the Web sites of PLoS Medicine at <http://www.plosmedicine.org/>, Annals of Internal Medicine at <http://www.annals.org/>, and Epidemiology at <http://www.epidem.com/>). Information on the STROBE Initiative is available at [www.strobe-statement.org](http://www.strobe-statement.org).

# BMJ Open

## Identical anthropometric characteristics of impaired fasting glucose combined with impaired glucose tolerance and newly-diagnosed type 2 diabetes: anthropometric indicators to predict hyperglycemia in a community-based prospective cohort study in southwest China

|                                 |                                                                                                                                                                                                                                                                                                                                                                                                                                                                                                                                                                                                                                                                                                                                                                                                            |
|---------------------------------|------------------------------------------------------------------------------------------------------------------------------------------------------------------------------------------------------------------------------------------------------------------------------------------------------------------------------------------------------------------------------------------------------------------------------------------------------------------------------------------------------------------------------------------------------------------------------------------------------------------------------------------------------------------------------------------------------------------------------------------------------------------------------------------------------------|
| Journal:                        | <i>BMJ Open</i>                                                                                                                                                                                                                                                                                                                                                                                                                                                                                                                                                                                                                                                                                                                                                                                            |
| Manuscript ID                   | bmjopen-2017-019735.R2                                                                                                                                                                                                                                                                                                                                                                                                                                                                                                                                                                                                                                                                                                                                                                                     |
| Article Type:                   | Research                                                                                                                                                                                                                                                                                                                                                                                                                                                                                                                                                                                                                                                                                                                                                                                                   |
| Date Submitted by the Author:   | 27-Feb-2018                                                                                                                                                                                                                                                                                                                                                                                                                                                                                                                                                                                                                                                                                                                                                                                                |
| Complete List of Authors:       | Zhang, Fang; Sichuan University West China Hospital, Division of Endocrinology and Metabolism<br>Wan, Qin; Hospital affiliated to Southwest Medical University, Division of Endocrinology and Metabolism<br>Cao, Hongyi; The Fifth People's Hospital of Chengdu, Chengdu<br>Tang, Lizhi; Sichuan University West China Hospital, Division of Endocrinology and Metabolism<br>Li, Daigang; Chengdu Yinchao Community Hospital<br>Lú, Qingguo; Sichuan University West China Hospital<br>Yan, Zhe; Sichuan University West China Hospital<br>Li, Jing; Sichuan University West China Hospital<br>Yang, Qiu; The Fifth People's Hospital of Chengdu<br>Zhang, Yuwei; Sichuan University West China Hospital<br>Tong, Nanwei; Sichuan University West China Hospital, Division of Endocrinology and Metabolism |
| <b>Primary Subject Heading</b>: | Diabetes and endocrinology                                                                                                                                                                                                                                                                                                                                                                                                                                                                                                                                                                                                                                                                                                                                                                                 |
| Secondary Subject Heading:      | Epidemiology, Diabetes and endocrinology                                                                                                                                                                                                                                                                                                                                                                                                                                                                                                                                                                                                                                                                                                                                                                   |
| Keywords:                       | impaired fasting glucose combined with impaired glucose tolerance, newly-diagnosed diabetes mellitus, pre-diabetes, waist-to-height ratio, anthropometric measurements                                                                                                                                                                                                                                                                                                                                                                                                                                                                                                                                                                                                                                     |
|                                 |                                                                                                                                                                                                                                                                                                                                                                                                                                                                                                                                                                                                                                                                                                                                                                                                            |

SCHOLARONE™  
Manuscripts

## Title:

Identical anthropometric characteristics of impaired fasting glucose combined with impaired glucose tolerance and newly-diagnosed type 2 diabetes: anthropometric indicators to predict hyperglycemia in a community-based prospective cohort study in southwest China

## Authors:

Fang Zhang 1, Qin Wan 2, Hongyi Cao 3, Lizhi Tang 1, Daigang Li 4, Qingguo Lü 1, Zhe Yan 1, Jing Li 1, Qiu Yang 3, Yuwei Zhang 1, Nanwei Tong 1 $\Delta$

$\Delta$ Corresponding author

## Authors' affiliations:

1. Division of Endocrinology and Metabolism, West China Hospital of Sichuan University, Chengdu, Sichuan, China
2. Division of Endocrinology and Metabolism, Hospital affiliated to Southwest Medical University, Luzhou, Sichuan, China
3. Division of Endocrinology and Metabolism, The Fifth People's Hospital of Chengdu, Chengdu, Sichuan, China
4. Chengdu Yinchao Community Hospital, Chengdu, Sichuan, China

## Correspondences:

Address correspondence and reprint requests to Nanwei Tong, MD, Division of Endocrinology and Metabolism, West China Hospital of Sichuan University, 37 Guoxuexiang, Chengdu, Sichuan 610041, China. Telephone number: 00+86-18980601196. Fax number: 00+86-28-85423459. E-mail: [tongnw@scu.edu.cn](mailto:tongnw@scu.edu.cn).

## Abstract

**Objectives:** To assess the anthropometric characteristics of normoglycemic individuals who subsequently developed hyperglycemia, and to evaluate the validity of these measures to predict pre-diabetes and diabetes.

**Design:** A community-based prospective cohort study.

**Participants:** In total, 1885 residents with euglycemia from six communities were enrolled.

**Setting:** Sichuan, southwest China

**Primary outcome measures:** The incidences of pre-diabetes and diabetes were the primary outcomes.

**Methods:** The waist-to-height ratio (WHtR), body mass index (BMI), waist circumference (WC), and waist-to-hip ratio (WHR) of all participants were measured at baseline and during follow-up. A 75 g glucose oral glucose tolerance test was conducted at each survey.

**Results:** During a median of 3.00 (interquartile range: 2.92—4.17) years follow-up, the cumulative incidence of isolated impaired fasting glucose (IFG), isolated impaired glucose tolerance (IGT), IFG combined with IGT (IFG+IGT), and newly-diagnosed diabetes mellitus (NDDM) were 8.44%, 18.14%, 8.06%, and 13.79%, respectively. WHtR, BMI, WC, and WHR were significantly different among subjects who subsequently progressed to isolated IFG or IGT, IFG+IGT, or NDDM ( $P < 0.05$ ). The anthropometric characteristics of IFG+IGT subjects were similar to those of the NDDM population ( $P > 0.005$ ). All the baseline anthropometric measurements were useful for the prediction of future pre-diabetes and NDDM ( $P < 0.05$ ). The optimal thresholds for the four measurements were calculated for the prediction of hyperglycemia, with a WHtR value of 0.52 performing best to identify isolated IFG or IGT, IFG+IGT, and NDDM.

**Conclusions:** Anthropometric measures, especially WHtR, could be used to predict hyperglycemia 3 years in advance. Distinct from isolated IFG and IGT, the individuals who developed combined IFG+IGT had identical anthropometric profiles to those who progressed to NDDM.

**Key words:** anthropometric measurements, impaired fasting glucose combined with impaired glucose tolerance, newly-diagnosed diabetes mellitus, pre-diabetes, waist-to-height ratio

1  
2  
3 Strengths and limitations of this study

- 4 1. This study described and compared the anthropometric characteristics of participants  
5 who subsequently progressed to isolated impaired fasting glucose (IFG), isolated  
6 impaired glucose tolerance (IGT), IFG combined with IGT, newly-diagnosed diabetes  
7 mellitus (NDDM), or who remained normoglycemic.  
8  
9 2. Variations in waist-to-height ratio, body mass index, waist circumference, and  
10 waist-to-hip ratio, were used to predict the transition from euglycemia to pre-diabetes,  
11 and overt NDDM in the following 3 years.  
12  
13 3. The optimal threshold values for the prediction of hyperglycemia were determined from  
14 the anthropometric measurements collected.  
15  
16 4. The inherent limitations of the present work were a relatively short follow-up period  
17 (median 3 years), a low completion ratio of 41.9%, and a limited sample size, meaning  
18 that anthropometric threshold values could not be determined by gender for each  
19 category of hyperglycemia.  
20  
21  
22  
23  
24  
25  
26  
27  
28  
29  
30  
31  
32  
33  
34  
35  
36  
37  
38  
39  
40  
41  
42  
43  
44  
45  
46  
47  
48  
49  
50  
51  
52  
53  
54  
55  
56  
57  
58  
59  
60

## Introduction

The rapidly growing incidence of diabetes means that, it is now reaching epidemic proportions in China. The overall prevalences of diabetes and pre-diabetes were estimated to be 11.6% and 50.1%, respectively, in Chinese adults in 2010 [1]. In 2007—2008, another cross-sectional study conducted across China found that the prevalences of isolated impaired fasting glucose (IFG), isolated impaired glucose tolerance (IGT), and IFG combined with IGT (IFG+IGT), were 3.2%, 11.0%, and 1.9% in men, and 2.2%, 10.9%, and 1.7% in women, respectively [2]. Isolated IFG, isolated IGT, and IFG+IGT, were selected as three different categories of pre-diabetes, reflecting the progression from euglycemia to type 2 diabetes (T2D). Approximately 75%—80% of diabetes patients develop cardiovascular disease (CVD) ultimately, and patients with pre-diabetes have also been shown to be at greater risk of heart attack and stroke [3-5]. It has been estimated that between 2005 and 2015, diabetes and consequent CVD have cost China US\$ 557.7 billion [6].

Measures to limit pre-diabetes are critical for the prevention of diabetes. Early recognition of pre-diabetes and prompt intervention could also reduce the impact on society as a whole. Both overall and central adiposity are closely linked to hyperglycemia. Body mass index (BMI) correlates with overall adiposity, while waist circumference (WC), waist-to-height ratio (WHtR), and waist-to-hip ratio (WHR) are indicators of central obesity. These four anthropometric indices are used globally to assess the risk of current or future diabetes [7-9].

Anthropometry is an affordable and practical screening tool for the presence of hyperglycemia, in both wealthy and impoverished areas of China. In this community-based prospective cohort study, we aimed to determine whether these anthropometric indices could predict future pre-diabetes and diabetes, and to establish optimal threshold values for the population. The baseline anthropometric characteristics of normoglycemic subjects, who subsequently developed isolated IFG, isolated IGT, IFG+IGT, and newly-diagnosed diabetes mellitus (NDDM) during follow-up, were compared and the similarities and differences between pairs of hyperglycemic categories were analyzed.

## Study design and methods

### *Study population*

The present study included two populations, in Luzhou City and in the Wenjiang area of Chengdu City. The Luzhou population are participants in the Risk Evaluation of cAncers in Chinese diabeTic Individuals: a LONGitudinal (REACTION) study, which is multicenter prospective observational study of 25 communities in mainland China [10, 11]. A total of 10007 residents, aged 40—89 years, were randomly recruited to participate in this study from five communities in Luzhou in 2011. Subjects with a history of diabetes, incident diabetes, or pre-diabetes, verified by an oral glucose tolerance test (OGTT), those missing values or any parameter, or having any of the other conditions (listed below), were excluded. After this, 3800 individuals with normoglycemia remained to form the baseline population. Of these, 1354 participants returned to complete the study in 2014. In addition, in 2016, 228 members of the baseline normoglycemic population who had not been studied in 2014, were followed up. Therefore, data from a total of 1582 subjects from Luzhou baseline screen were available

1  
2  
3 for analysis.

4  
5 In the Wenjiang survey, a cohort of 1104 participants aged 40—75 years were randomly  
6 recruited from Yinchao community in 2011. Using the same inclusion criteria, 698  
7 normoglycemic individuals comprised the baseline population. Of these, 303 subjects were  
8 followed up in 2015 and completed the study. Thus, from Luzhou and Wenjiang, a total of  
9 1885 participants were included in the analysis.  
10  
11

12 All of the subjects were of Han Chinese ethnicity. A flow diagram of the study design is  
13 displayed as Supplemental Figure 1. Individuals with the following conditions were excluded  
14 from the study: infection, pregnancy, malignant tumor, acute cardiovascular accident, serious  
15 trauma, liver or renal dysfunction, or long history of glucocorticoid use. The research was  
16 conducted in accordance with the principles of the Declaration of Helsinki II. All protocols  
17 used in this work were approved either by the Medical Ethics Committee of the hospital  
18 affiliated to the Southwest Medical University in Luzhou, or by the Committee on Human  
19 Research at the Fifth People's Hospital of Chengdu in Wenjiang. Each participant provided  
20 written informed consent.  
21  
22  
23

#### 24 25 *Patient and Public Involvement*

26 All patients were randomly recruited to participate in this study and were interviewed  
27 face-to-face by trained investigators for detailed explanation of informed consent at the  
28 beginning. Three months later, each participant was received a health report with advised  
29 suggestions.  
30  
31

#### 32 33 *Diagnosis of diabetes and pre-diabetes*

34 The diagnosis of hyperglycemic disorder was made in accordance with the American Diabetes  
35 Association recommendations, using OGTT, in 2011 [12]. Normal glycemic tolerance (NGT)  
36 was defined by a fasting plasma glucose (FPG) < 5.6 mmol/L and a 2-hour plasma glucose  
37 (2hPG) < 7.8 mmol/L. Isolated IFG was defined by 5.6 mmol/L ≤ FPG < 7.0 mmol/L and a  
38 2hPG < 7.8 mmol/L, while isolated IGT was defined by an FPG < 5.6 mmol/L and 7.8  
39 mmol/L ≤ 2hPG < 11.1 mmol/L. IFG+IGT was defined by 5.6 mmol/L ≤ FPG < 7.0 mmol/L  
40 and 7.8 mmol/L ≤ 2hPG < 11.1 mmol/L. Diabetes was defined by an FPG ≥ 7.0 mmol/L  
41 and/or a 2hPG ≥ 11.1 mmol/L.  
42  
43

#### 44 45 *Anthropometric measurements*

46 Anthropometric measurements, including body mass, height, WC, and hip circumference  
47 were made by trained investigators. Measurements were conducted while all participants were  
48 wearing light clothing, without footwear after a 10—12 hour overnight fast in the morning.  
49 Measurements were made using calibrated weighing scales, standard steel strip stadiometers,  
50 and tape measures. The results were recorded to the nearest 0.1 kg or 0.1 cm. WC was  
51 measured at the midpoint between the costal border and the iliac crest at the end of exhalation.  
52 Hip circumference was measured around the widest portion of the buttocks. BMI was  
53 calculated as body mass (kg) divided by height squared (m<sup>2</sup>), WHtR was calculated as WC  
54 (cm) divided by height (cm), and WHR as WC (cm) divided by hip circumference (cm).  
55  
56  
57  
58  
59  
60



### *Lifestyle variables and biological evaluation*

Trained investigators collected lifestyle information, consisting of demographic characteristics, current smoking status, physical activity situation, medications, and personal and family disease histories, using a standard questionnaire and face-to-face interviews. The questionnaire categorized the participants into two groups: subjects undertaking vigorous physical activity  $\geq 1$  day per week and subjects undertaking vigorous physical activity on  $< 1$  day per week. Blood pressure (BP) was measured three times in each participant using an electronic sphygmomanometer (OMRON, HEM-7220, Liaoning, China), with 5 min intervals between measurements, after at least 10 min rest, and the mean value was recorded.

All participants underwent an OGTT. After a 10–12 hour overnight fast, venous blood was drawn both before and 2 hours after they drank 300 ml water containing 75 g anhydrous glucose within 5 min. FPG and 2hPG concentrations were measured within 24 hours using the hexokinase method (Hitachi 7600 automatic biochemical analyzer, Hitachi Ltd., Tokyo, Japan). Fasting blood samples were collected for lipid profile measurements, including total cholesterol (TC), triglyceride (TG), high-density lipoprotein cholesterol (HDL-c), and low-density lipoprotein cholesterol (LDL-c). Serum TC, TG, and HDL-c concentrations were measured using oxidase colorimetric methods, and LDL-c concentration was measured by homogeneous assay, on a Hitachi 7600 automatic biochemical analyzer (Hitachi Ltd., Tokyo, Japan) within 24 hours. Hemoglobin A1c (HbA1c) was measured using the high performance liquid chromatography (VARIANT™ II TURBO Hemoglobin Testing System, Bio-Rad Laboratories, CA, USA). The samples were stored at  $-20^{\circ}\text{C}$  until analysis, which was undertaken within 3 weeks.

### *Statistical analysis*

Data were analyzed using SPSS software version 16.0 (SPSS, Chicago, IL, USA) and MedCalc software version 15.2.2 (MedCalc software, Ostend, Belgium). All data are expressed as mean  $\pm$  SD, median (interquartile range), or frequency (%), as appropriate. One-way ANOVA was used for parametric data, whereas the rank sum test was applied for non-parametric data. The chi-square test was used for the comparison of ratio. All tests were two-sided. In analyses of more than three groups, overall  $P < 0.05$  was considered significant. The Bonferroni correction and chi-square segmentation were used for multiple comparison adjustments. For the comparison of two specific subgroups,  $P < 0.005$  was considered significant. For BMI, WHtR, WC, and WHR, receiver operating characteristic (ROC) curve analyses were used to compare their ability to predict incident pre-diabetes and diabetes. The non-parametric approach described by DeLong *et al.* was used to compare the areas under ROC curves [13]. The predictive threshold values for hyperglycemia were calculated. COX proportional hazards regression was used to evaluate associations between anthropometric indices and hyperglycemic categories; the time axis consisted of the period of follow-up until pre-diabetes or diabetes developed, or the end of the study. Hazard ratio (HR) and 95% confidence interval (CI) were calculated.

### Results

### *Characteristics of subjects at baseline*

A total of 1885 normoglycemic subjects (649 men and 1236 women), with a median age of 56 (interquartile range: 48–61) years old, were recruited in 2011. After a median follow-up of 3.00 (2.92–4.17) years, 159 individuals had developed isolated IFG, 342 had developed isolated IGT, 152 had developed IFG+IGT, 260 had developed NDDM, and the remaining 972 participants remained normoglycemic. The incidences of pre-diabetes and NDDM were calculated to be 104.9 per 1000 person-years and 41.8 per 1000 person-years, respectively. The characteristics of all the subjects at baseline in Luzhou and Wenjiang are shown in Supplemental Table 1. The participants in Luzhou were older than the participants in Wenjiang, and had higher glucose levels at baseline and greater incidences of pre-diabetes and diabetes during follow-up. The baseline measurements of the participants who subsequently developed isolated IFG, isolated IGT, IFG+IGT, or NDDM in the future, are shown in Table 1. The subjects who developed NDDM were the oldest group at baseline of the five groups ( $P = 0.000$ ). The individuals who transitioned to isolated IGT, IFG+IGT, or NDDM had higher baseline HbA1c levels than the subjects who remained normoglycemic ( $P < 0.005$ ).

### *Baseline and follow-up anthropometric values in subjects who subsequently developed hyperglycemic disorders*

During the follow-up examination, it was found that WHtR in the NGT group was lower than in the isolated IGT, IFG+IGT, or NDDM groups ( $P < 0.005$ ) (Table 2), and was lower in the isolated IFG and isolated IGT groups than in the IFG+IGT and NDDM groups ( $P < 0.005$ ). The  $P$  values were 0.009 and 0.006 for BMI in isolated IFG versus IFG+IGT, and isolated IGT versus IFG+IGT, respectively, and 0.005 for WHR in the isolated IFG or IGT groups versus the IFG+IGT group. There were the trends towards the differences in both BMI and WHR between the isolated IFG or IGT groups, and the IFG+IGT group. To summarize, BMI, WC, and WHR in the five hyperglycemic groups tended to follow the following pattern: NGT < isolated IFG and isolated IGT < IFG+IGT and NDDM. Unlike when the isolated IFG or isolated IGT groups were compared, the anthropometric characteristics of the IFG+IGT group were similar to those of the NDDM at follow-up ( $P > 0.005$ ).

To assess whether the anthropometric values were already different before hyperglycemia developed, we evaluated the differences between groups at baseline, when all the subjects were still normoglycemic. Baseline WHtR, BMI, and WHR, but not WC, substantially differed among the five groups ( $P < 0.05$ ) (Table 2). NGT subjects had lower WHtR than the subjects who subsequently developed hyperglycemia ( $P < 0.005$ ). The WHtR values of the IFG+IGT and NDDM groups were higher than those of the isolated IFG group ( $P < 0.005$ ), while the isolated IGT group had a lower WHtR than the NDDM group ( $P < 0.005$ ). The BMI of the NGT group was lower than those of the isolated IGT, IFG+IGT, and NDDM groups ( $P < 0.005$ ), and the isolated IFG group had a lower BMI than NDDM subjects ( $P < 0.005$ ). In addition, NGT individuals had a lower WHR than NDDM patients at baseline ( $P < 0.005$ ). Consistent with the findings at follow-up, it is worth noting that at baseline, there were no significant differences in WHtR, BMI, and WHR between individuals who subsequently developed IFG+IGT and those who converted to NDDM ( $P > 0.005$ ).

### *Use of baseline anthropometric indices to predict future pre-diabetes and NDDM*

For the prediction of isolated IFG, baseline WHtR, WC, and WHR showed significantly different areas under the curve (AUCs) ( $P < 0.05$ ) (Table 3). WHtR and WC were more effective at predicting isolated IFG than BMI ( $P < 0.05$ ) (Figure 1A). For subjects who developed isolated IGT, the AUCs of all the four indices were significant ( $P = 0.000$ ). WHtR had a higher predictive value than BMI, WC, and WHR ( $P < 0.05$ ), while WC was superior to WHR for predicting isolated IGT ( $P < 0.05$ ) (Figure 1B). For IFG+IGT incidence, all four parameters were valuable predictors ( $P = 0.000$ ), among which WHtR and WC ranked higher than WHR ( $P < 0.05$ ) (Figure 1C). For the prediction of NDDM, the four indices were significant ( $P < 0.05$ ), but WHtR was the best predictor ( $P < 0.05$ ) (Figure 1D). The optimal thresholds for predicting hyperglycemia for the four indices (WC and WHR thresholds for men and women) were then calculated.

### *Multivariate analysis of baseline anthropometric indices with respect to risk of subsequent pre-diabetes and NDDM*

According to COX proportional hazards regression, the risk of developing isolated IFG was greater with higher WC at baseline ( $P < 0.05$ ) (Table 4). The risk factors for the development of isolated IGT were baseline WHtR, BMI, and WC ( $P < 0.05$ ). For both IFG+IGT and NDDM, high baseline WHtR, BMI, WC, and WHR were all risk factors ( $P < 0.05$ ).

### Discussion

In this community-based prospective cohort study, we have shown that: (1) For patients with hyperglycemia, WHtR, BMI, WC, and WHR tended to be as follows: NGT < isolated IFG and isolated IGT < IFG+IGT and NDDM. (2) Among these categories of hyperglycemia, it is noteworthy that unlike with respect to isolated IFG and isolated IGT, there were no significant differences in baseline WHtR or BMI between subjects with IFG+IGT and NDDM. (3) Thus, WHtR, BMI, WC, and WHR could predict the presence of pre-diabetes or diabetes 3 years in advance. Furthermore, the greater were these baseline anthropometric values, the higher was the risk of developing hyperglycemia. (4) Optimal threshold values for the four variables for identification of pre-diabetes and diabetes were calculated, with WHtR performing best of these in the prediction of hyperglycemia.

An Iranian study of 5879 people 9 years after they were initially found to be normoglycemic, found that 1755 subjects had developed pre-diabetes, and that isolated IFG was the commonest pre-diabetic phenotype. This study found that among women, in contrast to the use of BMI, hip and waist circumferences, WHtR was the only significant anthropometric predictor of pre-diabetes [14]. Lyssenko *et al.* reported a study of 1190 subjects in Finland who initially had NGT. During a median follow-up of 6 years, 199 had progressed to pre-diabetes. Compared with those who remained NGT, those with pre-diabetes had substantially higher BMI and WHtR at baseline [15]. Many investigators have shown that anthropometry is tightly correlated with the occurrence of pre-diabetes, although most of the studies conducted have been cross-sectional, rather than longitudinal [16-19].

After reviewing the literature, we found some common themes: (1) With respect to

1  
2  
3 pre-diabetes, the majority of the studies only defined one or two distinct pre-diabetic  
4 phenotypes, or defined a single category called “pre-diabetes”. (2) Rarely did investigators  
5 describe the respective anthropometric characteristics of the various hyperglycemic disorders  
6 in their manuscripts. We located only one previous report that gave anthropometric  
7 information in detail for all the potential pre-diabetic phenotypes and NDDM [20]. It was  
8 shown in this study that WHtR, BMI, WC, and WHR varied substantially among subjects  
9 with NGT, isolated IFG, isolated IGT, IFG+IGT, and NDDM, but none of the anthropometric  
10 indices were compared between hyperglycemic groups. Therefore, the possibility that  
11 anthropometry might vary between pre-diabetes and NDDM could not be assessed, and  
12 moreover, this study was cross-sectional. To our knowledge, the present work is the first  
13 prospective cohort study that not only described the anthropometric characteristics of  
14 participants who progressed to diverse hyperglycemic conditions, but also demonstrated the  
15 variation among WHtR, BMI, WC, and WHR in the transition from NGT to pre-diabetes and  
16 overt NDDM.  
17  
18  
19  
20

21 The pathogenesis of isolated IFG and isolated IGT is heterogeneous, while individuals with  
22 IFG+IGT manifest both hepatic and peripheral insulin resistance. Pre-diabetes, as an  
23 intermediate hyperglycemic state, carries a high-risk for the subsequent development of  
24 diabetes. Among the three pre-diabetic phenotypes, IFG+IGT carries approximately twice the  
25 risk of transition to diabetes compared with subjects with just one of abnormalities [21]. In  
26 our previous work, we found that several biomarkers in individuals with IFG+IGT had similar  
27 values to those present in the NDDM population, but these were different in individuals with  
28 IFG or IGT alone [22-24]. Consistent with this, in the present study we observed that  
29 participants who subsequently developed hyperglycemia had higher WHtR, BMI, and WHR  
30 at baseline than those who remained NGT. Among the three pre-diabetic phenotypes,  
31 IFG+IGT subjects had the most adverse anthropometric profiles at baseline, such that there  
32 were no significant differences from the NDDM group. These findings may imply that  
33 although IFG+IGT is a subtype of pre-diabetes, some aspects of its pathophysiology have  
34 already deteriorated to the same extent as in NDDM. However, pre-diabetes is a reversible  
35 condition and consequently, prompt intervention is required to avoid or delay its progression,  
36 especially for patients with IFG+IGT.  
37  
38  
39  
40  
41

42 A prospective study conducted in Pima Indians found that BMI and WHtR were the best  
43 predictors of diabetes in men, while BMI, WHtR, WC, and waist-to-thigh ratio were the best  
44 predictors in women [25]. Chei *et al.* published a cohort study of 5617 Japanese participants,  
45 finding that in women only, the significant predictors of T2D were BMI, WC, and WHtR [26].  
46 Finally, in a multi-ethnic cohort of 1073 non-Hispanic white, Hispanic, and African American  
47 non-diabetic individuals, baseline anthropometric information showed that BMI was most  
48 predictive of diabetes in the non-Hispanic white and Hispanic populations, whereas all the  
49 indicators of central obesity were more predictive than measures of overall adiposity in the  
50 African American population [27]. The contrasts in these sets of data indicate that the validity  
51 of such anthropometric measurements for the prediction of diabetes development vary among  
52 different ethnicities, genders, and regions. Based on our ROC analysis, WHtR was most  
53 effective for the prediction of pre-diabetes and overt NDDM, followed by WC, while BMI  
54  
55  
56  
57  
58  
59  
60

1  
2  
3 and WHR were relatively weak predictors. Results from two western Pacific studies were  
4 consistent with our findings [28, 29].  
5

6  
7 A systematic review proposed that the threshold values for WHtR in the prediction of diabetes  
8 in men and women are 0.52 and 0.53, respectively [30]. In a Chinese community-based  
9 prospective cohort study, the optimal threshold values for WHtR and BMI were 0.51 and 24  
10 for men, and 0.55 and 25 for women, respectively [29]. These predictive values were similar  
11 to those identified in our study.  
12

13  
14 Several limitations to our work should be addressed. First, the follow-up period of a median  
15 3.00 years was relatively short. However, we identified high cumulative incidences of  
16 pre-diabetes and NDDM (34.6% and 13.8%, respectively). The fast pace of life and sedentary  
17 lifestyle of the population may be the main contributor to the rapid growth in hyperglycemia.  
18 However, it might also be the result of selection bias, because subjects with a higher risk  
19 might be more likely to take part in the follow-up assessment. In addition, the participants  
20 were  $\geq 40$  years old, a little older than the subjects ( $\geq 35$  years) in some other epidemiological  
21 studies. This might be also an explanation that a large proportion of subjects became  
22 hyperglycemic in this cohort study. Second, the proportion of participants attending the  
23 follow-up assessment was low (41.91%). Conducting of a phone interview once a year at least,  
24 followed by prompt examination, could improve this statistic in the future. Third, the sample  
25 size was limited. On account of this weakness, it was not possible to calculate anthropometric  
26 threshold values for each hyperglycemic state by gender. Further studies are required to  
27 establish specific screening thresholds for pre-diabetes and NDDM in men and women,  
28 especially with regard to WC and WHR. Fourth, there was lack of OGTT reproducibility in  
29 each set of measurements. Unwillingness of subjects, and limited staff and financial resources,  
30 were the two major causes of this. By combining these data with the questionnaire data and  
31 the HbA1c results, we tried to minimize the associated error and improve the diagnostic  
32 accuracy as much as possible.  
33  
34  
35  
36  
37

38  
39 In summary, WHtR, BMI, WC, and WHR are all predictors of the development of  
40 pre-diabetes and NDDM 3 years in advance. Individuals with high WHtR, BMI, WC, and  
41 WHR are thus at higher risk of developing pre-diabetes and T2D. The optimal thresholds for  
42 all the anthropometric measures to predict hyperglycemia were calculated, with a WHtR value  
43 of 0.52 performing best at predicting the development of isolated IFG or IGT, IFG+IGT, and  
44 NDDM. The magnitude of WHtR and BMI in normoglycemic subjects illustrate the  
45 likelihood of progression from normoglycemia to pre-diabetes, and then to overt T2D. Of  
46 note, and in contrast to the situation with regard to isolated IFG or IGT, the anthropometric  
47 characteristics of IFG+IGT subjects were similar to those of the NDDM population, both at  
48 baseline and follow-up.  
49  
50

51  
52  
53  
54  
55 Contributorship statement  
56  
57  
58  
59  
60

1  
2  
3 All the authors engaged in the surveys. FZ and NT designed this article. QW, HC, DL and QY  
4 acquired and collected data. JL, ZY, QL and YZ organized all the data. FZ, QW and HC  
5 analyzed all the information. FZ and LT drafted the manuscript. FZ and NT revised the article  
6 critically. All the authors read and approved the final manuscript.  
7  
8  
9

#### 10 Acknowledgements

11 All the authors appreciated the doctors and other staffs from primary health care centers for  
12 health report suggestions, materials supplement, and participant organization.  
13  
14  
15

#### 16 Competing interests

17 All the authors declared that there were no competing interests among them.  
18  
19  
20

#### 21 Fundings

22 The surveys in Luzhou were supported by the grants from the National Clinical Research  
23 Center for Metabolic Diseases (2013BAI09B13), the National Key New Drug Creation and  
24 Manufacturing Program of Ministry of Science and Technology (2012ZX09303006—001).  
25 The screenings in Wenjiang were supported by the National Key Technology R&D Program  
26 of China (Grant No. 2009BAI80B01 and No. 2009BAI80B02) and Sichuan Provincial  
27 Science and Technology Foundation (Grant No. 150022 and No. 2015SZ0228).  
28  
29  
30  
31

#### 32 Data sharing statement

33 A supplementary profile will be available online which contains comprehensive figure  
34 and table of used input data. Inquiries about additional unpublished data could be  
35 contacted with the corresponding author.  
36  
37  
38  
39  
40  
41

#### 42 References

- 43 1. Xu Y, Wang L, He J, Bi Y, Li M, Wang T, Wang L, Jiang Y, Dai M, Lu J, Xu M, Li  
44 Y, Hu N, Li J, Mi S, Chen CS, Li G, Mu Y, Zhao J, Kong L, Chen J, Lai S, Wang  
45 W, Zhao W, Ning G; 2010 China Noncommunicable Disease Surveillance Group.  
46 Prevalence and Control of Diabetes in Chinese Adults. *JAMA*. 2013; 310 (9): 948-958.
- 47 2. Yang W, Lu J, Weng J, Jia W, Ji L, Xiao J, Shan Z, Liu J, Tian H, Ji Q, Zhu D, Ge J, Lin  
48 L, Chen L, Guo X, Zhao Z, Li Q, Zhou Z, Shan G, He J; China National Diabetes and  
49 Metabolic Disorders Study Group. Prevalence of Diabetes among Men and Women in  
50 China. *N Engl J Med*. 2010; 362: 1090-101.
- 51 3. Rydén L, Grant PJ, Anker SD, Berne C, Cosentino F, Danchin N, Deaton C, Escaned  
52 J, Hammes HP, Huikuri H, Marre M, Marx N, Mellbin L, Ostergren J, Patrono  
53 C, Seferovic P, Uva MS, Taskinen MR, Tendera M, Tuomilehto J, Valensi P, Zamorano  
54  
55  
56  
57  
58  
59  
60

- JL; ESC Committee for Practice Guidelines (CPG), Zamorano JL, Achenbach S, Baumgartner H, Bax JJ, Bueno H, Dean V, Deaton C, Erol C, Fagard R, Ferrari R, Hasdai D, Hoes AW, Kirchhof P, Knuuti J, Kolh P, Lancellotti P, Linhart A, Nihoyannopoulos P, Piepoli MF, Ponikowski P, Sirnes PA, Tamargo JL, Tendera M, Torbicki A, Wijns W, Windecker S; Document Reviewers, De Backer G, Sirnes PA, Ezquerro EA, Avogaro A, Badimon L, Baranova E, Baumgartner H, Betteridge J, Ceriello A, Fagard R, Funck-Brentano C, Gulba DC, Hasdai D, Hoes AW, Kjekshus JK, Knuuti J, Kolh P, Lev E, Mueller C, Neyses L, Nilsson PM, Perk J, Ponikowski P, Reiner Z, Sattar N, Schächinger V, Scheen A, Schirmer H, Strömberg A, Sudzhaeva S, Tamargo JL, Viigimaa M, Vlachopoulos C, Xuereb RG. ESC Guidelines on diabetes, pre-diabetes, and cardiovascular diseases developed in collaboration with the EASD. *European Heart Journal*. 2013; 34: 3035–3087.
4. Tanne D, Koren-Morag N, Goldbourt U. Fasting plasma glucose and risk of incident ischemic stroke or transient ischemic attacks: a prospective cohort study. *Stroke*. 2004; 35:2351-5.
  5. Norhammar A, Tenerz A, Nilsson G, Hamsten A, Efendic S, Rydén L, Malmberg K. Glucose metabolism in patients with acute myocardial infarction and no previous diagnosis of diabetes mellitus: a prospective study. *Lancet*. 2002; 359: 2140-4.
  6. Chinese Diabetes Society. China Guideline for Type 2 Diabetes. *Chinese Diabetes Society*. 2010. (Chinese)
  7. Chen L, Magliano DJ, Balkau B, Colagiuri S, Zimmet PZ, Tonkin AM, Mitchell P, Phillips PJ, Shaw JE. AUSDRISK: an Australian type 2 diabetes risk assessment tool based on demographic, lifestyle and simple anthropometric measures. *Medical Journal of Australia*. 2010; 192 (4): 197–202.
  8. Lindstrom J, Tuomilehto J. The diabetes risk score: a practical tool to predict type 2 diabetes risk. *Diabetes Care*. 2003; 26: (3)725–731.
  9. Mohan V, Sandeep S, Deepa M, Gokulakrishnan K, Datta M, Deepa R. A diabetes risk score helps identify metabolic syndrome and cardiovascular risk in Indians – the Chennai Urban Rural Epidemiology Study (CURES-38). *Diabetes, Obesity and Metabolism*. 2007; 9 (3): 337–343.
  10. Lu J, Bi Y, Wang T, Wang W, Mu Y, Zhao J, Liu C, Chen L, Shi L, Li Q, Wan Q, Wu S, Qin G, Yang T, Yan L, Liu Y, Wang G, Luo Z, Tang X, Chen G, Huo Y, Gao Z, Su Q, Ye Z, Wang Y, Deng H, Yu X, Shen F, Chen L, Zhao L, Dai M, Xu M, Xu Y, Chen Y, Lai S, Ning G. The relationship between insulin-sensitive obesity and cardiovascular diseases in a Chinese population: Results of the REACTION study. *International Journal of Cardiology*. 2014; 172: 388–394.
  11. Bi Y, Lu J, Wang W, Mu Y, Zhao J, Liu C, Chen L, Shi L, Li Q, Wan Q, Wu S, Yang T, Yan L, Liu Y, Wang G, Luo Z, Tang X, Chen G, Huo Y, Gao Z, Su Q, Ye Z, Wang Y, Qin G, Deng H, Yu X, Shen F, Chen L, Zhao L, Zhang J, Sun J, Dai M, Xu M, Xu Y, Chen Y, Lai S, Bloomgarden ZT, Li D, Ning G. Cohort profile: Risk evaluation of cancers in Chinese diabetic individuals: A longitudinal (REACTION) study. *J Diabetes*. 2014; 6 (2): 147–57.
  12. American Diabetes Association. Standards of medical care in diabetes–2010. *Diabetes Care*. 2011; 33 (Suppl. 1): S11–61.

13. DeLong ER, DeLong DM, Clarke-Pearson DL. Comparing the areas under two or more correlated receiver operating characteristic curves: a nonparametric approach. *Biometrics*. 1988; 44 (3): 837-45.
14. Hadaegh F, Derakhshan A, Zafari N, Khalili D, Mirbolouk M, Saadat N, Azizi F. Pre-diabetes tsunami: incidence rates and risk factors of pre-diabetes and its different phenotypes over 9 years of follow-up. *Diabet Med*. 2017; 34 (1): 69-78.
15. Lyssenko V, Almgren P, Anevski D, Perfekt R, Lahti K, Nissén M, Isomaa B, Forsen B, Homström N, Saloranta C, Taskinen MR, Groop L, Tuomi T, Botnia study group. Predictors of and longitudinal changes in insulin sensitivity and secretion preceding onset of type 2 diabetes. *Diabetes*. 2005; 54 (1):166-74.
16. Xu Z, Qi X, Dahl AK, Xu W. Waist-to-height ratio is the best indicator for undiagnosed type 2 diabetes. *Diabet Med*. 2013; 30 (6):e201-7.
17. Hu D, Xie J, Fu P, Zhou J, Yu D, Whelton PK, He J, Gu D. Central rather than overall obesity is related to diabetes in the Chinese population: the InterASIA study. *Obesity (Silver Spring)*. 2007 Nov; 15 (11):2809-16.
18. Jung SH, Ha KH, Kim DJ. Visceral fat mass has stronger associations with diabetes and prediabetes than other anthropometric obesity indicators among Korean adults. *Yonsei Med J*. 2016 May; 57 (3):674-80.
19. Hayashi T, Boyko EJ, Leonetti DL, McNeely MJ, Newell-Morris L, Kahn SE, Fujimoto WY. Visceral adiposity and the risk of impaired glucose tolerance: a prospective study among Japanese Americans. *Diabetes Care*. 2003; 26 (3):650-5.
20. Alperet DJ, Lim WY, Mok-Kwee Heng D, Ma S, van Dam RM. Optimal anthropometric measures and thresholds to identify undiagnosed type 2 diabetes in three major Asian ethnic groups. *Obesity (Silver Spring)*. 2016 Oct; 24 (10):2185-93.
21. Nathan DM, Davidson MB, DeFronzo RA, Heine RJ, Henry RR, Pratley R, Zinman B, American Diabetes Association. Impaired fasting glucose and impaired glucose tolerance: implications for care. *Diabetes Care*. 2007 Mar; 30 (3):753-9.
22. Huang L, Tong Y, Zhang F, Yang Q, Li D, Xie S, Li Y, Cao H, Tang L, Zhang X, Tong N. Increased acyl ghrelin but decreased total ghrelin and unacyl ghrelin in Chinese Han people with impaired fasting glucose combined with impaired glucose tolerance. *Peptides*. 2014 Oct; 60:86-94.
23. Lü Q, Tong N, Liu Y, Li N, Tang X, Zhao J, Cao H, Li D, Gou L, Zhang Y, Wan J, Jiang L. Community-based population data indicates the significant alterations of insulinresistance , chronic inflammation and urine ACR in IFG combined IGT group amongprediabetic population. *Diabetes Res Clin Pract*. 2009 Jun; 84 (3):319-24.
24. Zhang F, Tang X, Cao H, Lü Q, Li N, Liu Y, Zhang X, Zhang Y, Cao M, Wan J, An Z, Tong N. Impaired secretion of total glucagon-like peptide-1 in people with impaired fasting glucose combined impaired glucose tolerance. *Int J Med Sci*. 2012; 9 (7):574-81.
25. Tulloch-Reid MK, Williams DE, Looker HC, Hanson RL, Knowler WC. Do measures of body fat distribution provide information on the risk of type 2 diabetes in addition to measures of general obesity? Comparison of anthropometric predictors of



- 1  
2  
3 type 2 diabetes in Pima Indians. *Diabetes Care*. 2003 Sep; 26 (9):2556-61.
- 4 26. Chei CL, Iso H, Yamagishi K, Tanigawa T, Cui R, Imano H, Kiyama M, Kitamura A, Sato  
5 S, Shimamoto T. Body fat distribution and the risk of hypertension and diabetes among  
6 Japanese men and women. *Hypertens Res*. 2008 May; 31 (5):851-7.
- 7 27. MacKay MF, Haffner SM, Wagenknecht LE, D'Agostino RB Jr, Hanley AJ.  
8 Prediction of type 2 diabetes using alternate anthropometric measures in a multi-ethnic  
9 cohort: the insulin resistance atherosclerosis study. *Diabetes Care*. 2009 May; 32  
10 (5):956-8.
- 11 28. Son YJ, Kim J, Park HJ, Park SE, Park CY, Lee WY, Oh KW, Park SW, Rhee EJ.  
12 Association of Waist-Height Ratio with Diabetes Risk: A 4-Year Longitudinal  
13 Retrospective Study. *Endocrinol Metab (Seoul)*. 2016 Mar; 31 (1):127-33.
- 14 29. Xu F, Wang YF, Lu L, Liang Y, Wang Z, Hong X, Li J. Comparison of anthropometric  
15 indices of obesity in predicting subsequent risk of hyperglycemia among Chinese men  
16 and women in Mainland China. *Asia Pac J Clin Nutr*. 2010; 19 (4):586-93.
- 17 30. Browning LM, Hsieh SD, Ashwell M. A systematic review of waist-to-height ratio as a  
18 screening tool for the prediction of cardiovascular disease and diabetes: 0.5 could be a  
19 suitable global boundary value. *Nutrition Research Reviews*. 2010; 23: 247-269.
- 20  
21  
22  
23  
24  
25  
26  
27  
28  
29  
30  
31  
32  
33  
34  
35  
36  
37  
38  
39  
40  
41  
42  
43  
44  
45  
46  
47  
48  
49  
50  
51  
52  
53  
54  
55  
56  
57  
58  
59  
60

Table 1. General measurements of subjects at baseline who progressed to hyperglycemia at follow-up

|                                     | NGT<br>(n = 972)             | Isolated IFG<br>(n = 159)  | Isolated IGT<br>(n = 342)   | IFG+IGT<br>(n = 152)       | NDDM<br>(n = 260)            | overall <i>P</i><br>value |
|-------------------------------------|------------------------------|----------------------------|-----------------------------|----------------------------|------------------------------|---------------------------|
| Follow-up time (year)               | 3.00 (2.92—4.17)‡            | 3.00 (2.92—4.17)‡          | 2.92 (2.92—3.17)*†          | 3.00 (2.92—3.17)           | 3.00 (2.92—3.17)             | 0.000                     |
| Age (year)                          | 53 (46—59)†‡§¶               | 55 (48—62)*¶               | 59 (49—65)*                 | 56 (49—62)*¶               | 60 (54—65)*†§                | 0.000                     |
| Female (N/n%)                       | 675 (69.44%)                 | 96 (60.38%)                | 220 (64.33%)                | 97 (63.82%)                | 166 (63.85%)                 | 0.075                     |
| Height (cm)                         | 158.00<br>(153.10—164.00)    | 159.45<br>(154.00—165.52)  | 157.00<br>(152.00—162.70)   | 157.10<br>(154.00—164.00)  | 156.00<br>(152.00—163.20)    | 0.492                     |
| Weight (kg)                         | 58.00 (52.00—65.00)          | 60.50 (53.99—66.85)        | 60.00 (53.00—66.20)         | 62.10 (56.70—69.50)        | 62.00 (55.00—69.75)          | 0.498                     |
| Hip circumference (cm)              | 93.00 (88.20—97.20)          | 94.00 (90.00—99.00)        | 95.00 (90.20—100.00)        | 96.00<br>(92.00—100.30)    | 96.00 (92.00—101.00)         | 0.879                     |
| SBP (mmHg)                          | 115.67<br>(105.33—128.67)‡§¶ | 118.50<br>(107.46—133.00)¶ | 122.50<br>(109.33—136.67)*¶ | 123.00<br>(114.00—137.67)* | 130.67<br>(118.67—142.17)*†‡ | 0.000                     |
| DBP (mmHg)                          | 74.33 (68.00—81.33)§¶        | 77.00 (70.00—83.75)        | 76.33 (69.00—83.33)¶        | 77.50<br>(72.33—82.67)*    | 79.00 (72.33—88.17)*‡        | 0.000                     |
| FPG (mmol/L)                        | 5.08 (4.83—5.29)†§¶          | 5.20 (4.98—5.38)*          | 5.11 (4.90—5.33)            | 5.16 (4.93—5.36)*          | 5.16 (4.92—5.36)*            | 0.000                     |
| 2hPG (mmol/L)                       | 6.15 (5.40—6.88)‡§           | 6.14 (5.45—6.93)           | 6.40 (5.67—7.09)*           | 6.54 (5.85—7.10)*          | 6.33 (5.50—7.08)             | 0.000                     |
| HbA1c (%)                           | 5.60 (5.30—5.90)‡§¶          | 5.70 (5.48—5.90)           | 5.70 (5.40—5.90)*           | 5.70 (5.50—6.00)*          | 5.70 (5.40—6.00)*            | 0.000                     |
| TG (mmol/L)                         | 1.10 (0.80—1.60)             | 1.12 (0.80—1.63)           | 1.11 (0.84—1.59)            | 1.14 (0.89—1.60)           | 1.07 (0.81—1.50)             | 0.494                     |
| TC (mmol/L)                         | 4.46 ± 1.01                  | 4.45 ± 1.17                | 4.50 ± 1.02                 | 4.72 ± 1.14                | 4.52 ± 1.10                  | 0.062                     |
| HDL-c (mmol/L)                      | 1.32 (1.09—1.60)             | 1.32 (1.05—1.52)           | 1.30 (1.08—1.56)            | 1.36 (1.20—1.57)           | 1.31 (1.09—1.60)             | 0.376                     |
| LDL-c (mmol/L)                      | 2.51 (2.04—3.03)             | 2.44 (1.97—3.09)           | 2.53 (1.99—2.99)            | 2.65 (2.06—3.17)           | 2.45 (1.95—3.01)             | 0.688                     |
| Family history of diabetes<br>(N/%) | 119 (12.24%)                 | 12 (7.55%)                 | 29 (8.48%)                  | 18 (11.84%)                | 29 (11.15%)                  | 0.214                     |
| Current smoker (N/%)                | 137 (14.10%)                 | 28 (17.61%)                | 42 (12.28%)                 | 18 (11.84%)                | 44 (16.92%)                  | 0.307                     |
| Physical activity (N/%)             | 719 (73.97%)                 | 107 (67.30%)               | 255 (74.56%)                | 113 (74.34%)               | 195 (75.00%)                 | 0.435                     |

1  
2  
3  
4  
5  
6  
7 NGT, normal glucose tolerance; IFG, impaired fasting glucose; IGT, impaired glucose tolerance; IFG+IGT, IFG combined with IGT; NDDM, newly-diagnosed  
8 diabetes mellitus; SBP, systolic blood pressure; DBP, diastolic blood pressure; FPG, fasting plasma glucose; 2hPG, 2 hour plasma glucose (after oral glucose  
9 tolerance test); TG, triglyceride; TC, total cholesterol; HDL-c, high-density lipoprotein cholesterol; LDL-c, low-density lipoprotein cholesterol.

10 Data are expressed as means  $\pm$  SD or median (interquartile range) or N (%).

11 Chi-square test was used to compare gender compositions, family history of diabetes, current smoking status and physical activity among five groups. If needed,  
12 chi-square segmentation was applied for further comparisons between any two subgroups with an adjusted significance level ( $\alpha = 0.005$ ).

13 Kruskal-Wallis H analysis was applied for follow-up time among five groups. Mann-Whitney U analysis was performed for comparison within any two subgroups  
14 additionally ( $\alpha = 0.005$ ).

15 One-way ANOVA analysis was used for the rest measurements among five groups, while LSD analysis was applied for age, SBP, DBP, FPG, 2hPG and HbA1c  
16 comparisons between any two subgroups ( $\alpha = 0.005$ ).

17  
18 \*, versus NGT and  $P < 0.005$ ; †, versus isolated IFG and  $P < 0.005$ ; ‡, versus isolated IGT and  $P < 0.005$ ; §, versus IFG+IGT and  $P < 0.005$ ; ¶, versus NDDM and  $P$   
19 < 0.005.  
20  
21  
22  
23  
24  
25  
26  
27  
28  
29  
30  
31  
32  
33  
34  
35  
36  
37  
38  
39  
40  
41  
42  
43  
44  
45  
46  
47

Table 2. Baseline and follow-up anthropometric values in participants who developed hyperglycemic disorders

|                             | NGT<br>(n = 972)        | Isolated IFG<br>(n = 159) | Isolated IGT<br>(n = 342) | IFG+IGT<br>(n = 152)      | NDDM<br>(n = 260)         | overall P<br>value |
|-----------------------------|-------------------------|---------------------------|---------------------------|---------------------------|---------------------------|--------------------|
| At follow-up survey         |                         |                           |                           |                           |                           |                    |
| WHtR (cm/cm)                | 0.51 (0.47—0.55)‡§¶     | 0.52 (0.48—0.56)§¶        | 0.53 (0.49—0.57)*§¶       | 0.54 (0.51—0.59)*†‡       | 0.56 (0.52—0.60)*†‡       | 0.000              |
| BMI (kg/m <sup>2</sup> )    | 23.46 (21.77—25.53)†‡§¶ | 24.27 (22.49—26.17)*¶     | 24.44 (22.63—26.50)*¶     | 25.09 (23.62—27.01)*      | 25.73<br>(23.29—27.82)*†‡ | 0.000              |
| Waist circumference<br>(cm) | 80.65 (74.00—87.00)†‡§¶ | 82.80 (77.00—91.00)*§¶    | 84.00<br>(78.00—90.00)*§¶ | 86.70<br>(80.28—93.00)*†‡ | 88.00<br>(82.00—95.00)*†‡ | 0.000              |
| WHR (cm/cm)                 | 0.86 (0.81—0.91)†‡§¶    | 0.88 (0.84—0.92)*¶        | 0.88 (0.83—0.92)*¶        | 0.90 (0.86—0.94)*         | 0.91 (0.87—0.95)*†‡       | 0.000              |
| At baseline survey          |                         |                           |                           |                           |                           |                    |
| WHtR (cm/cm)                | 0.50 ± 0.05†‡§¶         | 0.52 ± 0.06*§¶            | 0.53 ± 0.05*¶             | 0.54 ± 0.05*†             | 0.55 ± 0.06*†‡            | 0.000              |
| BMI (kg/m <sup>2</sup> )    | 23.03 (21.23—25.16)†‡§¶ | 23.31 (21.56—25.64)¶      | 24.03 (22.10—26.22)*      | 24.98 (23.47—26.67)*      | 25.42 (23.17—27.22)*†     | 0.000              |
| Waist circumference<br>(cm) | 79.00 (73.00—86.00)     | 82.00 (76.00—89.00)       | 83.00 (77.10—89.00)       | 87.00 (81.00—91.28)       | 86.00 (80.00—93.00)       | 0.282              |
| WHR (cm/cm)                 | 0.86 (0.81—0.90)¶       | 0.87 (0.92—0.92)          | 0.87 (0.82—0.91)          | 0.89 (0.86—0.93)          | 0.90 (0.86—0.94)*         | 0.010              |

NGT, normal glucose tolerance; IFG, impaired fasting glucose; IGT, impaired glucose tolerance; IFG+IGT, IFG combined with IGT; NDDM, newly-diagnosed diabetes mellitus; WHtR, waist-to-height ratio; BMI, body mass index; WHR, waist-to-hip ratio.

Data are expressed as median (interquartile range) or means ± SD.

At follow-up survey: One-way ANOVA analysis was used for WHtR, BMI and WC among the five glucose metabolic groups. LSD analysis was applied for the further comparisons between any two subgroups (a' = 0.005). Kruskal-Wallis H analysis was applied for WHR among the five groups and Mann-Whitney U analysis was performed for the following comparisons within any two subgroups (a' = 0.005).

At baseline survey: One-way ANOVA analysis was used for all indices among the five glucose metabolic groups. LSD analysis was applied for WHtR, BMI and WHR between any two subgroups' comparison (a' = 0.005).

\*, versus NGT and P < 0.005; †, versus isolated IFG and P < 0.005; ‡, versus isolated IGT and P < 0.005; §, versus IFG+IGT and P < 0.005; ¶, versus NDDM and P

1  
2  
3  
4  
5  
6  
7  
8  
9  
10  
11  
12  
13  
14  
15  
16  
17  
18  
19  
20  
21  
22  
23  
24  
25  
26  
27  
28  
29  
30  
31  
32  
33  
34  
35  
36  
37  
38  
39  
40  
41  
42  
43  
44  
45  
46  
47

< 0.005.

For peer review only

1  
2  
3  
4  
5  
6  
7  
8  
9  
10  
11  
12  
13  
14  
15  
16  
17  
18  
19  
20  
21  
22  
23  
24  
25  
26  
27  
28  
29  
30  
31  
32  
33  
34  
35  
36  
37  
38  
39  
40  
41  
42  
43  
44  
45  
46  
47

Table 3. ROC curve analysis of baseline anthropometric indices for predicting future hyperglycemia

|                          | AUC   | SE    | P value | 95%CI         | Cut-off point | Youden's value | Sensitivity | Specificity | DeLong's test (P value) |                          |                          |             |
|--------------------------|-------|-------|---------|---------------|---------------|----------------|-------------|-------------|-------------------------|--------------------------|--------------------------|-------------|
|                          |       |       |         |               |               |                |             |             | WHtR (cm/cm)            | BMI (kg/m <sup>2</sup> ) | Waist circumference (cm) | WHR (cm/cm) |
| Isolated IFG             |       |       |         |               |               |                |             |             |                         |                          |                          |             |
| WHtR (cm/cm)             | 0.578 | 0.025 | 0.002   | (0.529—0.626) | 0.51          | 0.151          | 54.90%      | 60.19%      | —                       | 0.010                    | 0.201                    | 0.611       |
| BMI (kg/m <sup>2</sup> ) | 0.544 | 0.025 | 0.081   | (0.495—0.593) | 21.36         | 0.078          | 80.40%      | 27.43%      | 0.010                   | —                        | 0.023                    | 0.421       |
| Waist circumference (cm) | 0.592 | 0.024 | 0.000   | (0.545—0.639) | 77.10         | 0.148          | 71.24%      | 43.54%      | 0.201                   | 0.023                    | —                        | 0.195       |
| Women                    | 0.584 | 0.031 | 0.010   | (0.524—0.644) | 75.00         | 0.166          | 74.44%      | 42.11%      | —                       | —                        | —                        | —           |
| Men                      | 0.579 | 0.041 | 0.050   | (0.526—0.631) | 87.00         | 0.165          | 49.21%      | 67.24%      | —                       | —                        | —                        | —           |
| WHR (cm/cm)              | 0.567 | 0.026 | 0.008   | (0.537—0.597) | 0.88          | 0.128          | 47.06%      | 65.71%      | 0.611                   | 0.421                    | 0.195                    | —           |
| Women                    | 0.568 | 0.033 | 0.036   | (0.504—0.632) | 0.85          | 0.140          | 57.78%      | 56.19%      | —                       | —                        | —                        | —           |
| Men                      | 0.525 | 0.042 | 0.534   | (0.471—0.578) | 0.90          | 0.095          | 53.97%      | 55.52%      | —                       | —                        | —                        | —           |
| Isolated IGT             |       |       |         |               |               |                |             |             |                         |                          |                          |             |
| WHtR (cm/cm)             | 0.634 | 0.017 | 0.000   | (0.600—0.667) | 0.51          | 0.214          | 62.24%      | 59.12%      | —                       | 0.003                    | 0.006                    | 0.000       |

1  
2  
3  
4  
5  
6  
7  
8  
9  
10  
11  
12  
13  
14  
15  
16  
17  
18  
19  
20  
21  
22  
23  
24  
25  
26  
27  
28  
29  
30  
31  
32  
33  
34  
35  
36  
37  
38  
39  
40  
41  
42  
43  
44  
45  
46  
47

|                          |       |       |       |               |       |       |        |        |       |       |       |       |
|--------------------------|-------|-------|-------|---------------|-------|-------|--------|--------|-------|-------|-------|-------|
| BMI (kg/m <sup>2</sup> ) | 0.591 | 0.018 | 0.000 | (0.556—0.627) | 22.68 | 0.155 | 68.88% | 46.64% | 0.003 | —     | 0.178 | 0.223 |
| Waist circumference (cm) | 0.610 | 0.017 | 0.000 | (0.576—0.645) | 78.00 | 0.197 | 71.90% | 47.81% | 0.006 | 0.178 | —     | 0.001 |
| Women                    | 0.635 | 0.021 | 0.000 | (0.593—0.676) | 78.00 | 0.260 | 68.42% | 57.59% | —     | —     | —     | —     |
| Men                      | 0.542 | 0.032 | 0.174 | (0.480—0.605) | 87.80 | 0.132 | 43.44% | 69.76% | —     | —     | —     | —     |
| WHR (cm/cm)              | 0.567 | 0.018 | 0.000 | (0.539—0.594) | 0.86  | 0.123 | 61.63% | 50.64% | 0.000 | 0.223 | 0.001 | —     |
| Women                    | 0.587 | 0.022 | 0.000 | (0.544—0.630) | 0.82  | 0.154 | 77.03% | 38.39% | —     | —     | —     | —     |
| Men                      | 0.524 | 0.032 | 0.433 | (0.463—0.586) | 0.89  | 0.098 | 57.38% | 52.41% | —     | —     | —     | —     |
| IFG+IGT                  |       |       |       |               |       |       |        |        |       |       |       |       |
| WHtR (cm/cm)             | 0.713 | 0.022 | 0.000 | (0.670—0.755) | 0.53  | 0.351 | 62.33% | 72.79% | —     | 0.106 | 0.556 | 0.026 |
| BMI (kg/m <sup>2</sup> ) | 0.685 | 0.022 | 0.000 | (0.642—0.729) | 23.38 | 0.316 | 77.40% | 54.22% | 0.106 | —     | 0.254 | 0.492 |
| Waist circumference (cm) | 0.706 | 0.021 | 0.000 | (0.665—0.748) | 79.80 | 0.351 | 82.88% | 52.19% | 0.556 | 0.254 | —     | 0.032 |
| Women                    | 0.732 | 0.026 | 0.000 | (0.682—0.783) | 79.80 | 0.420 | 79.57% | 62.38% | —     | —     | —     | —     |
| Men                      | 0.656 | 0.039 | 0.000 | (0.579—0.733) | 90.30 | 0.242 | 43.40% | 80.76% | —     | —     | —     | —     |

1  
2  
3  
4  
5  
6  
7  
8  
9  
10  
11  
12  
13  
14  
15  
16  
17  
18  
19  
20  
21  
22  
23  
24  
25  
26  
27  
28  
29  
30  
31  
32  
33  
34  
35  
36  
37  
38  
39  
40  
41  
42  
43  
44  
45  
46  
47

|                          |       |       |       |               |       |       |        |        |       |       |       |       |  |
|--------------------------|-------|-------|-------|---------------|-------|-------|--------|--------|-------|-------|-------|-------|--|
| WHR (cm/cm)              | 0.667 | 0.022 | 0.000 | (0.638—0.695) | 0.87  | 0.274 | 69.18% | 58.23% | 0.026 | 0.492 | 0.032 | —     |  |
| Women                    | 0.686 | 0.027 | 0.000 | (0.633—0.739) | 0.83  | 0.312 | 86.02% | 45.20% | —     | —     | —     | —     |  |
| Men                      | 0.631 | 0.038 | 0.003 | (0.556—0.705) | 0.92  | 0.261 | 54.72% | 71.38% | —     | —     | —     | —     |  |
| NDDM                     |       |       |       |               |       |       |        |        |       |       |       |       |  |
| WHtR (cm/cm)             | 0.730 | 0.017 | 0.000 | (0.696—0.764) | 0.52  | 0.366 | 74.21% | 62.43% | —     | 0.000 | 0.001 | 0.010 |  |
| BMI (kg/m <sup>2</sup> ) | 0.677 | 0.020 | 0.000 | (0.639—0.716) | 24.32 | 0.315 | 64.68% | 66.81% | 0.000 | —     | 0.093 | 0.596 |  |
| Waist circumference (cm) | 0.700 | 0.018 | 0.000 | (0.665—0.735) | 78.00 | 0.292 | 81.35% | 47.81% | 0.001 | 0.093 | —     | 0.429 |  |
| Women                    | 0.714 | 0.021 | 0.000 | (0.673—0.756) | 77.10 | 0.344 | 81.76% | 52.63% | —     | —     | —     | —     |  |
| Men                      | 0.686 | 0.033 | 0.000 | (0.622—0.750) | 88.00 | 0.298 | 56.99% | 72.85% | —     | —     | —     | —     |  |
| WHR (cm/cm)              | 0.688 | 0.018 | 0.000 | (0.661—0.715) | 0.88  | 0.304 | 67.73% | 62.71% | 0.010 | 0.596 | 0.429 | —     |  |
| Women                    | 0.696 | 0.022 | 0.000 | (0.653—0.738) | 0.84  | 0.301 | 79.75% | 50.31% | —     | —     | —     | —     |  |
| Men                      | 0.681 | 0.030 | 0.000 | (0.622—0.740) | 0.92  | 0.299 | 60.22% | 69.66% | —     | —     | —     | —     |  |

---

ROC, receiver operating characteristic; IFG, impaired fasting glucose; IGT, impaired glucose tolerance; IFG+IGT, IFG combined with IGT; NDDM, newly-diagnosed diabetes mellitus; AUC, area under curve; SE, standard error; CI, confidence interval; WHtR, waist-to-height ratio; BMI, body mass index; WHR,



1  
2  
3  
4  
5  
6  
7  
8  
9  
10  
11  
12  
13  
14  
15  
16  
17  
18  
19  
20  
21  
22  
23  
24  
25  
26  
27  
28  
29  
30  
31  
32  
33  
34  
35  
36  
37  
38  
39  
40  
41  
42  
43  
44  
45  
46  
47

waist-to-hip ratio.

For peer review only

1  
2  
3  
4  
5  
6  
7  
8  
9  
10  
11  
12  
13  
14  
15  
16  
17  
18  
19  
20  
21  
22  
23  
24  
25  
26  
27  
28  
29  
30  
31  
32  
33  
34  
35  
36  
37  
38  
39  
40  
41  
42  
43  
44  
45  
46  
47

Table 4. Multivariate analysis of baseline anthropometric indices with respect to risk of subsequent pre-diabetes and NDDM

|                          | Isolated IFG |               |          | Isolated IGT |               |          | IFG+IGT |               |          | NDDM  |               |          |
|--------------------------|--------------|---------------|----------|--------------|---------------|----------|---------|---------------|----------|-------|---------------|----------|
|                          | HR           | 95% CI        | <i>P</i> | HR           | 95% CI        | <i>P</i> | HR      | 95% CI        | <i>P</i> | HR    | 95% CI        | <i>P</i> |
| WHR (cm/cm)              | 1.471        | (0.901—2.402) | 0.123    | 1.951        | (1.550—2.457) | 0.000    | 3.002   | (2.137—4.216) | 0.000    | 2.765 | (2.065—3.703) | 0.000    |
| BMI (kg/m <sup>2</sup> ) | 1.186        | (0.699—2.012) | 0.526    | 1.571        | (1.241—1.988) | 0.000    | 3.298   | (2.224—4.892) | 0.000    | 2.305 | (1.773—2.998) | 0.000    |
| Waist circumference (cm) | 1.603        | (1.112—2.310) | 0.011    | 1.644        | (1.275—2.118) | 0.000    | 4.570   | (2.948—7.084) | 0.000    | 2.666 | (1.886—3.769) | 0.000    |
| WHR (cm/cm)              | 1.182        | (0.739—1.889) | 0.486    | 0.972        | (0.724—1.304) | 0.848    | 1.571   | (1.003—2.465) | 0.048    | 1.706 | (1.196—2.433) | 0.003    |

NDDM, newly-diagnosed diabetes mellitus; IFG, impaired fasting glucose; IGT, impaired glucose tolerance; IFG+IGT, IFG combined with IGT; HR, hazard ratio; CI, confidence interval; WHtR, waist-to-height ratio; BMI, body mass index; WHR, waist-to-hip ratio.

Cox proportional hazards models were used to calculate HR and 95% CI. A univariate analysis was performed for each potential risk factor firstly, including age (years), gender (male/female), systolic blood pressure (mmHg), diastolic blood pressure (mmHg), fasting plasma glucose (mmol/L), 2 hour plasma glucose (mmol/L) (after oral glucose tolerance test), HbA1c (%), total cholesterol (mmol/L), triglyceride (mmol/L), high-density lipoprotein cholesterol (mmol/L), low-density lipoprotein cholesterol (mmol/L), diabetes family history (yes/no), current smoking status (yes/no), physical activity situation (yes/no), WHtR (low/high), BMI (low/high), WC (low/high) and WHR (low/high). The four anthropometric indicators were dichotomized into low or high level by using cut-off values derived from previous ROC curve analysis. Then those risk factors with a *P*-value < 0.2 in univariate analysis were selected to enter the multivariate model.

1  
2  
3 Figure legends  
4

5 Figure 1. ROC curves of baseline anthropometric indices in subjects who developed (A)  
6 isolated IFG, (B) isolated IGT, (C) IFG+IGT and (D) NDDM. ROC, receiver operating  
7 characteristic; IFG, impaired fasting glucose; IGT, impaired glucose tolerance; IFG+IGT, IFG  
8 combined with IGT; NDDM, newly-diagnosed diabetes mellitus; WHtR, waist-to-height ratio;  
9 BMI, body mass index; WHR, waist-to-hip ratio; WC, waist circumference.  
10  
11

12 Supplemental Figure 1. Flow-chart of study design. NGT, normal glyceic tolerance; OGTT,  
13 oral glucose tolerance test; NDDM, newly-diagnosed diabetes mellitus. The re-visited  
14 participants in the blue background came from the baseline populations; the subjects in the  
15 pink background were the ones recruited in this study, who were normoglycemic at baseline.  
16  
17  
18  
19  
20  
21  
22  
23  
24  
25  
26  
27  
28  
29  
30  
31  
32  
33  
34  
35  
36  
37  
38  
39  
40  
41  
42  
43  
44  
45  
46  
47  
48  
49  
50  
51  
52  
53  
54  
55  
56  
57  
58  
59  
60



Figure 1. ROC curves of baseline anthropometric indices in subjects who developed (A) isolated IFG, (B) isolated IGT, (C) IFG+IGT and (D) NDDM. ROC, receiver operating characteristic; IFG, impaired fasting glucose; IGT, impaired glucose tolerance; IFG+IGT, IFG combined with IGT; NDDM, newly-diagnosed diabetes mellitus; WHtR, waist-to-height ratio; BMI, body mass index; WHR, waist-to-hip ratio; WC, waist circumference.

158x114mm (300 x 300 DPI)

Supplemental Table 1. Baseline characteristics of all the participants screened in Luzhou and Wenjiang

|                                    | Luzhou baseline survey |                        |                        | <i>P</i> | Wenjiang baseline survey |                     |                     | <i>P</i> |
|------------------------------------|------------------------|------------------------|------------------------|----------|--------------------------|---------------------|---------------------|----------|
|                                    | Total (n = 1582)       | Men (n = 495)          | Women (n = 1087)       |          | Total (n = 303)          | Men (n = 154)       | Women (n = 149)     |          |
| Age (year)                         | 57 (50—63)             | 60 (54—66)             | 56 (49—61)             | 0.000    | 47 (43—54)               | 47 (43—54)          | 46 (42—52)          | 0.161    |
| Female (N/n%)                      | 1087 (68.71%)          | —                      | —                      |          | 149 (49.17%)             | —                   | —                   |          |
| Height (cm)                        | 157.00 (152.40—163.00) | 165.00 (160.50—169.00) | 154.55 (151.00—158.20) | 0.180    | 161.28 ± 7.60            | 166.46 ± 5.27       | 155.56 ± 5.32       | 0.000    |
| Weight (kg)                        | 59.00 (53.00—65.30)    | 65.00 (58.30—72.00)    | 56.50 (51.20—62.50)    | 0.000    | 61.88 ± 11.36            | 67.66 ± 8.84        | 55.49 ± 10.38       | 0.000    |
| Hip circumference (cm)             | 94.00 (89.20—99.00)    | 95.00 (90.00—100.00)   | 94.00 (89.00—98.20)    | 0.655    | 93.47 ± 6.04             | 95.01 ± 5.43        | 91.76 ± 6.24        | 0.000    |
| SBP (mmHg)                         | 120.67 (108.67—135.67) | 126.00 (113.83—140.17) | 119.00 (107.00—133.37) | 0.000    | 114.90 ± 14.27           | 118.20 ± 14.02      | 111.26 ± 13.69      | 0.000    |
| DBP (mmHg)                         | 75.33 (69.00—82.67)    | 79.00 (71.67—88.17)    | 74.00 (68.00—80.67)    | 0.000    | 78.40 ± 16.26            | 81.15 ± 10.84       | 75.36 ± 20.27       | 0.001    |
| FPG (mmol/L)                       | 5.14 (4.93—5.34)       | 5.15 (4.96—5.38)       | 5.13 (4.92—5.32)       | 0.011    | 4.90 (4.60—5.10)         | 4.90 (4.70—5.20)    | 4.80 (4.60—5.10)    | 0.286    |
| 2hPG (mmol/L)                      | 6.32 (5.57—7.00)       | 6.32 (5.57—6.98)       | 6.32 (5.57—7.01)       | 0.777    | 6.00 (5.00—6.70)         | 5.90 (5.03—5.78)    | 6.00 (5.00—6.80)    | 0.541    |
| HbA1c (%)                          | 5.70 (5.40—5.90)       | 5.70 (5.50—5.95)       | 5.70 (5.40—5.90)       | 0.069    | 5.48 ± 0.42              | 5.51 ± 0.38         | 5.45 ± 0.45         | 0.228    |
| TG (mmol/L)                        | 1.33 ± 0.94            | 1.29 ± 0.84            | 1.34 ± 0.98            | 0.388    | 1.10 (0.80—1.80)         | 1.50 (0.90—2.18)    | 0.90 (0.70—1.50)    | 0.000    |
| TC (mmol/L)                        | 4.44 (3.75—5.18)       | 4.32 (3.63—5.12)       | 4.50 (3.82—5.19)       | 0.017    | 4.53 ± 0.83              | 4.60 ± 0.82         | 4.45 ± 0.83         | 0.178    |
| HDL-c (mmol/L)                     | 1.28 (1.06—1.52)       | 1.26 (1.03—1.52)       | 1.29 (1.08—1.52)       | 0.107    | 1.59 ± 0.39              | 1.47 ± 0.32         | 1.71 ± 0.41         | 0.000    |
| LDL-c (mmol/L)                     | 2.52 ± 0.77            | 2.47 ± 0.74            | 2.54 ± 0.79            | 0.078    | 2.86 ± 0.75              | 2.92 ± 0.70         | 2.79 ± 0.80         | 0.252    |
| WHtR (cm/cm)                       | 0.52 (0.48—0.56)       | 0.53 (0.49—0.56)       | 0.52 (0.48—0.56)       | 0.900    | 0.49 (0.45—0.53)         | 0.50 (0.47—0.53)    | 0.47 (0.44—0.51)    | 0.000    |
| BMI (kg/m <sup>2</sup> )           | 23.74 (21.61—26.00)    | 24.04 (21.81—26.14)    | 23.68 (21.51—25.92)    | 0.462    | 23.49 (21.64—25.59)      | 24.40 (22.33—26.03) | 22.44 (21.10—24.24) | 0.000    |
| Waist circumference (cm)           | 82.00 (76.00—89.00)    | 87.00 (80.00—92.45)    | 80.00 (75.00—87.10)    | 0.201    | 79.00 (72.00—86.00)      | 84.00 (79.00—89.00) | 73.00 (69.75—78.00) | 0.000    |
| WHR (cm/cm)                        | 0.86 (0.80—0.91)       | 0.89 (0.83—0.94)       | 0.85 (0.79—0.90)       | 0.476    | 0.86 (0.80—0.91)         | 0.83 (0.78—0.89)    | 0.87 (0.81—0.92)    | 0.256    |
| Outcomes at follow-up: N/total (%) |                        |                        |                        |          |                          |                     |                     |          |
| NGT                                | 757 (47.85%)           | 203 (41.01%)           | 554 (50.97%)           | —        | 215 (70.96%)             | 103 (66.88%)        | 112 (75.17%)        | —        |
| Isolated IFG                       | 131 (8.28%)            | 51 (10.30%)            | 80 (7.34%)             | —        | 28 (9.24%)               | 12 (7.79%)          | 16 (10.74%)         | —        |
| Isolated IGT                       | 304 (19.22%)           | 103 (20.81%)           | 201 (18.49%)           | —        | 38 (12.54%)              | 24 (15.58%)         | 14 (9.40%)          | —        |
| IFG+IGT                            | 137 (8.66%)            | 46 (9.29%)             | 91 (8.37%)             | —        | 15 (4.95%)               | 11 (7.14%)          | 4 (2.68%)           | —        |

1  
2  
3  
4  
5  
6  
7  
8  
9  
10  
11  
12  
13  
14  
15  
16  
17  
18  
19  
20  
21  
22  
23  
24  
25  
26  
27  
28  
29  
30  
31  
32  
33  
34  
35  
36  
37  
38  
39  
40  
41  
42  
43  
44  
45  
46

|      |              |             |              |   |           |           |           |   |
|------|--------------|-------------|--------------|---|-----------|-----------|-----------|---|
| NDDM | 253 (15.99%) | 92 (18.59%) | 161 (14.81%) | — | 7 (2.31%) | 4 (2.61%) | 3 (2.01%) | — |
|------|--------------|-------------|--------------|---|-----------|-----------|-----------|---|

SBP, systolic blood pressure; DBP, diastolic blood pressure; FPG, fasting plasma glucose; 2hPG, 2 hour plasma glucose (after oral glucose tolerance test); TG, triglyceride; TC, total cholesterol; HDL-c, high-density lipoprotein cholesterol; LDL-c, low-density lipoprotein cholesterol; WHtR, waist-to-height ratio; BMI, body mass index; WHR, waist-to-hip ratio; NGT, normal glucose tolerance; IFG, impaired fasting glucose; IGT, impaired glucose tolerance; IFG+IGT, IFG combined with IGT; NDDM, newly-diagnosed diabetes mellitus.

Data are expressed as mean ±SD, or median (interquartile range), or N (%).

Mann-Whitney U analysis was used for DBP and BMI in Luzhou, TG and HDL-c in Wenjiang; one-way ANOVA analysis was used for the rest measurements in two surveys.

*P* value of men versus women.

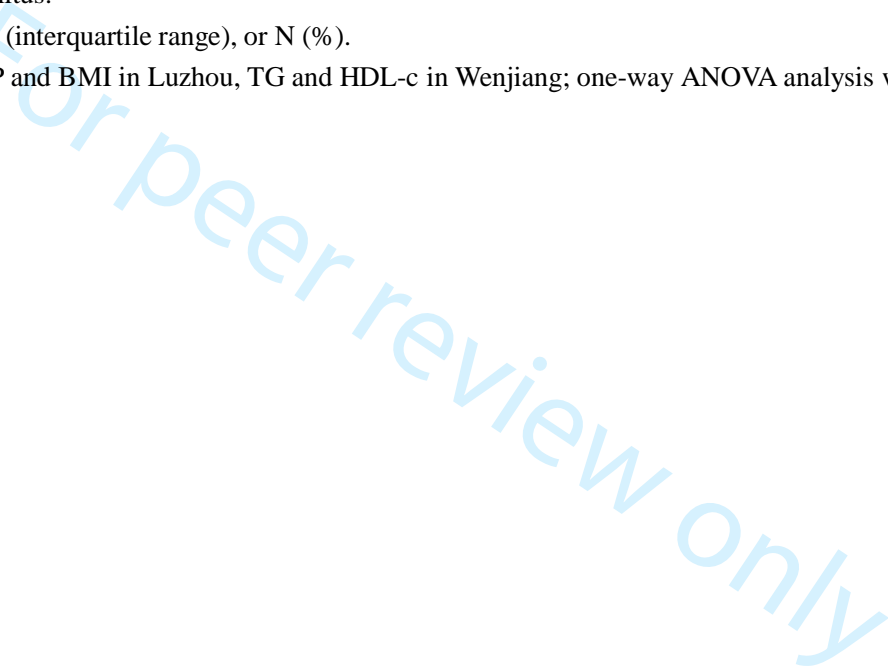

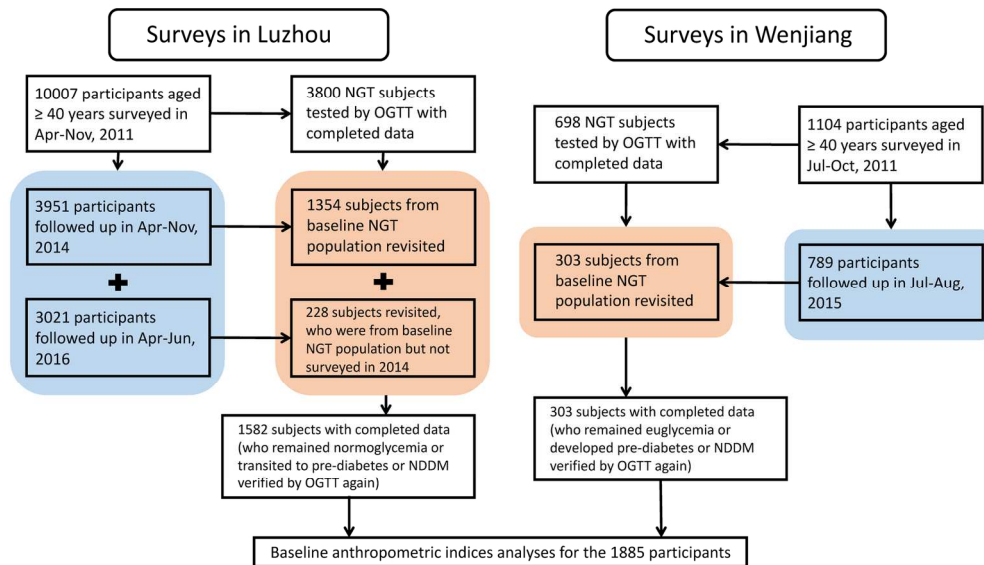

Supplemental Figure 1. Flow-chart of study design. NGT, normal glycemic tolerance; OGTT, oral glucose tolerance test; NDDM, newly-diagnosed diabetes mellitus. The re-visited participants in the blue background came from the baseline populations; the subjects in the pink background were the ones recruited in this study, who were normoglycemic at baseline.

165x94mm (300 x 300 DPI)

**STROBE 2007 (v4) checklist of items to be included in reports of observational studies in epidemiology\***  
**Checklist for cohort, case-control, and cross-sectional studies (combined)**

| Section/Topic             | Item # | Recommendation                                                                                                                                                                                                                                                                                                                                                                                                                                                         | Reported on page # |
|---------------------------|--------|------------------------------------------------------------------------------------------------------------------------------------------------------------------------------------------------------------------------------------------------------------------------------------------------------------------------------------------------------------------------------------------------------------------------------------------------------------------------|--------------------|
| Title and abstract        | 1      | (a) Indicate the study’s design with a commonly used term in the title or the abstract                                                                                                                                                                                                                                                                                                                                                                                 | 1, 2               |
|                           |        | (b) Provide in the abstract an informative and balanced summary of what was done and what was found                                                                                                                                                                                                                                                                                                                                                                    | 2                  |
| <b>Introduction</b>       |        |                                                                                                                                                                                                                                                                                                                                                                                                                                                                        |                    |
| Background/rationale      | 2      | Explain the scientific background and rationale for the investigation being reported                                                                                                                                                                                                                                                                                                                                                                                   | 4                  |
| Objectives                | 3      | State specific objectives, including any pre-specified hypotheses                                                                                                                                                                                                                                                                                                                                                                                                      | 4                  |
| <b>Methods</b>            |        |                                                                                                                                                                                                                                                                                                                                                                                                                                                                        |                    |
| Study design              | 4      | Present key elements of study design early in the paper                                                                                                                                                                                                                                                                                                                                                                                                                | 4, 5               |
| Setting                   | 5      | Describe the setting, locations, and relevant dates, including periods of recruitment, exposure, follow-up, and data collection                                                                                                                                                                                                                                                                                                                                        | 4, 5               |
| Participants              | 6      | (a) <i>Cohort study</i> —Give the eligibility criteria, and the sources and methods of selection of participants. Describe methods of follow-up<br><i>Case-control study</i> —Give the eligibility criteria, and the sources and methods of case ascertainment and control selection. Give the rationale for the choice of cases and controls<br><i>Cross-sectional study</i> —Give the eligibility criteria, and the sources and methods of selection of participants | 4, 5               |
|                           |        | (b) <i>Cohort study</i> —For matched studies, give matching criteria and number of exposed and unexposed<br><i>Case-control study</i> —For matched studies, give matching criteria and the number of controls per case                                                                                                                                                                                                                                                 | NA                 |
| Variables                 | 7      | Clearly define all outcomes, exposures, predictors, potential confounders, and effect modifiers. Give diagnostic criteria, if applicable                                                                                                                                                                                                                                                                                                                               | 5, 6               |
| Data sources/ measurement | 8*     | For each variable of interest, give sources of data and details of methods of assessment (measurement). Describe comparability of assessment methods if there is more than one group                                                                                                                                                                                                                                                                                   | 5, 6               |
| Bias                      | 9      | Describe any efforts to address potential sources of bias                                                                                                                                                                                                                                                                                                                                                                                                              | NA                 |
| Study size                | 10     | Explain how the study size was arrived at                                                                                                                                                                                                                                                                                                                                                                                                                              | 4, 5               |
| Quantitative variables    | 11     | Explain how quantitative variables were handled in the analyses. If applicable, describe which groupings were chosen and why                                                                                                                                                                                                                                                                                                                                           | 5, 6               |
| Statistical methods       | 12     | (a) Describe all statistical methods, including those used to control for confounding                                                                                                                                                                                                                                                                                                                                                                                  | 6                  |
|                           |        | (b) Describe any methods used to examine subgroups and interactions                                                                                                                                                                                                                                                                                                                                                                                                    | 6                  |
|                           |        | (c) Explain how missing data were addressed                                                                                                                                                                                                                                                                                                                                                                                                                            | 6                  |
|                           |        | (d) <i>Cohort study</i> —If applicable, explain how loss to follow-up was addressed<br><i>Case-control study</i> —If applicable, explain how matching of cases and controls was addressed                                                                                                                                                                                                                                                                              | 6                  |



|                          |     |                                                                                                                                                                                                              |       |
|--------------------------|-----|--------------------------------------------------------------------------------------------------------------------------------------------------------------------------------------------------------------|-------|
|                          |     | <i>Cross-sectional study</i> —If applicable, describe analytical methods taking account of sampling strategy                                                                                                 |       |
|                          |     | (e) Describe any sensitivity analyses                                                                                                                                                                        | NA    |
| <b>Results</b>           |     |                                                                                                                                                                                                              |       |
| Participants             | 13* | (a) Report numbers of individuals at each stage of study—eg numbers potentially eligible, examined for eligibility, confirmed eligible, included in the study, completing follow-up, and analysed            | 7     |
|                          |     | (b) Give reasons for non-participation at each stage                                                                                                                                                         | 5     |
|                          |     | (c) Consider use of a flow diagram                                                                                                                                                                           | 5     |
| Descriptive data         | 14* | (a) Give characteristics of study participants (eg demographic, clinical, social) and information on exposures and potential confounders                                                                     | 6     |
|                          |     | (b) Indicate number of participants with missing data for each variable of interest                                                                                                                          | NA    |
|                          |     | (c) <i>Cohort study</i> —Summarise follow-up time (eg, average and total amount)                                                                                                                             | 5     |
| Outcome data             | 15* | <i>Cohort study</i> —Report numbers of outcome events or summary measures over time                                                                                                                          | 6     |
|                          |     | <i>Case-control study</i> —Report numbers in each exposure category, or summary measures of exposure                                                                                                         | NA    |
|                          |     | <i>Cross-sectional study</i> —Report numbers of outcome events or summary measures                                                                                                                           | NA    |
| Main results             | 16  | (a) Give unadjusted estimates and, if applicable, confounder-adjusted estimates and their precision (eg, 95% confidence interval). Make clear which confounders were adjusted for and why they were included | 7, 8  |
|                          |     | (b) Report category boundaries when continuous variables were categorized                                                                                                                                    | 6-8   |
|                          |     | (c) If relevant, consider translating estimates of relative risk into absolute risk for a meaningful time period                                                                                             | 7, 8  |
| Other analyses           | 17  | Report other analyses done—eg analyses of subgroups and interactions, and sensitivity analyses                                                                                                               | NA    |
| <b>Discussion</b>        |     |                                                                                                                                                                                                              |       |
| Key results              | 18  | Summarise key results with reference to study objectives                                                                                                                                                     | 8     |
| Limitations              | 19  | Discuss limitations of the study, taking into account sources of potential bias or imprecision. Discuss both direction and magnitude of any potential bias                                                   | 9, 10 |
| Interpretation           | 20  | Give a cautious overall interpretation of results considering objectives, limitations, multiplicity of analyses, results from similar studies, and other relevant evidence                                   | 8-10  |
| Generalisability         | 21  | Discuss the generalisability (external validity) of the study results                                                                                                                                        | 10    |
| <b>Other information</b> |     |                                                                                                                                                                                                              |       |
| Funding                  | 22  | Give the source of funding and the role of the funders for the present study and, if applicable, for the original study on which the present article is based                                                | 10    |

\*Give information separately for cases and controls in case-control studies and, if applicable, for exposed and unexposed groups in cohort and cross-sectional studies.

**Note:** An Explanation and Elaboration article discusses each checklist item and gives methodological background and published examples of transparent reporting. The STROBE checklist is best used in conjunction with this article (freely available on the Web sites of PLoS Medicine at <http://www.plosmedicine.org/>, Annals of Internal Medicine at <http://www.annals.org/>, and Epidemiology at <http://www.epidem.com/>). Information on the STROBE Initiative is available at [www.strobe-statement.org](http://www.strobe-statement.org).
