# Supplementary material for: Identical anthropometric characteristics of impaired fasting glucose combined with impaired glucose tolerance and newly diagnosed type 2 diabetes: anthropometric indicators to predict hyperglycaemia in a community-based prospective cohort study in southwest China
Source: PubMed Central journal article supplement (PMC5942465; doi:10.1136/bmjopen-2017-019735), 2018-05-09
Supplement: bmjopen-2017-019735supp002.pdf [file bmjopen-2017-019735supp002.pdf]

Supplemental Table 1. Baseline characteristics of all the participants screened in Luzhou and Wenjiang

|                                    | Luzhou baseline survey |                        |                        | <i>P</i> | Wenjiang baseline survey |                     |                     | <i>P</i> |
|------------------------------------|------------------------|------------------------|------------------------|----------|--------------------------|---------------------|---------------------|----------|
|                                    | Total (n = 1582)       | Men (n = 495)          | Women (n = 1087)       |          | Total (n = 303)          | Men (n = 154)       | Women (n = 149)     |          |
| Age (year)                         | 57 (50—63)             | 60 (54—66)             | 56 (49—61)             | 0.000    | 47 (43—54)               | 47 (43—54)          | 46 (42—52)          | 0.161    |
| Female (N/n%)                      | 1087 (68.71%)          | —                      | —                      |          | 149 (49.17%)             | —                   | —                   |          |
| Height (cm)                        | 157.00 (152.40—163.00) | 165.00 (160.50—169.00) | 154.55 (151.00—158.20) | 0.180    | 161.28 ± 7.60            | 166.46 ± 5.27       | 155.56 ± 5.32       | 0.000    |
| Weight (kg)                        | 59.00 (53.00—65.30)    | 65.00 (58.30—72.00)    | 56.50 (51.20—62.50)    | 0.000    | 61.88 ± 11.36            | 67.66 ± 8.84        | 55.49 ± 10.38       | 0.000    |
| Hip circumference (cm)             | 94.00 (89.20—99.00)    | 95.00 (90.00—100.00)   | 94.00 (89.00—98.20)    | 0.655    | 93.47 ± 6.04             | 95.01 ± 5.43        | 91.76 ± 6.24        | 0.000    |
| SBP (mmHg)                         | 120.67 (108.67—135.67) | 126.00 (113.83—140.17) | 119.00 (107.00—133.37) | 0.000    | 114.90 ± 14.27           | 118.20 ± 14.02      | 111.26 ± 13.69      | 0.000    |
| DBP (mmHg)                         | 75.33 (69.00—82.67)    | 79.00 (71.67—88.17)    | 74.00 (68.00—80.67)    | 0.000    | 78.40 ± 16.26            | 81.15 ± 10.84       | 75.36 ± 20.27       | 0.001    |
| FPG (mmol/L)                       | 5.14 (4.93—5.34)       | 5.15 (4.96—5.38)       | 5.13 (4.92—5.32)       | 0.011    | 4.90 (4.60—5.10)         | 4.90 (4.70—5.20)    | 4.80 (4.60—5.10)    | 0.286    |
| 2hPG (mmol/L)                      | 6.32 (5.57—7.00)       | 6.32 (5.57—6.98)       | 6.32 (5.57—7.01)       | 0.777    | 6.00 (5.00—6.70)         | 5.90 (5.03—5.78)    | 6.00 (5.00—6.80)    | 0.541    |
| HbA1c (%)                          | 5.70 (5.40—5.90)       | 5.70 (5.50—5.95)       | 5.70 (5.40—5.90)       | 0.069    | 5.48 ± 0.42              | 5.51 ± 0.38         | 5.45 ± 0.45         | 0.228    |
| TG (mmol/L)                        | 1.33 ± 0.94            | 1.29 ± 0.84            | 1.34 ± 0.98            | 0.388    | 1.10 (0.80—1.80)         | 1.50 (0.90—2.18)    | 0.90 (0.70—1.50)    | 0.000    |
| TC (mmol/L)                        | 4.44 (3.75—5.18)       | 4.32 (3.63—5.12)       | 4.50 (3.82—5.19)       | 0.017    | 4.53 ± 0.83              | 4.60 ± 0.82         | 4.45 ± 0.83         | 0.178    |
| HDL-c (mmol/L)                     | 1.28 (1.06—1.52)       | 1.26 (1.03—1.52)       | 1.29 (1.08—1.52)       | 0.107    | 1.59 ± 0.39              | 1.47 ± 0.32         | 1.71 ± 0.41         | 0.000    |
| LDL-c (mmol/L)                     | 2.52 ± 0.77            | 2.47 ± 0.74            | 2.54 ± 0.79            | 0.078    | 2.86 ± 0.75              | 2.92 ± 0.70         | 2.79 ± 0.80         | 0.252    |
| WHR (cm/cm)                        | 0.52 (0.48—0.56)       | 0.53 (0.49—0.56)       | 0.52 (0.48—0.56)       | 0.900    | 0.49 (0.45—0.53)         | 0.50 (0.47—0.53)    | 0.47 (0.44—0.51)    | 0.000    |
| BMI (kg/m <sup>2</sup> )           | 23.74 (21.61—26.00)    | 24.04 (21.81—26.14)    | 23.68 (21.51—25.92)    | 0.462    | 23.49 (21.64—25.59)      | 24.40 (22.33—26.03) | 22.44 (21.10—24.24) | 0.000    |
| Waist circumference (cm)           | 82.00 (76.00—89.00)    | 87.00 (80.00—92.45)    | 80.00 (75.00—87.10)    | 0.201    | 79.00 (72.00—86.00)      | 84.00 (79.00—89.00) | 73.00 (69.75—78.00) | 0.000    |
| WHR (cm/cm)                        | 0.86 (0.80—0.91)       | 0.89 (0.83—0.94)       | 0.85 (0.79—0.90)       | 0.476    | 0.86 (0.80—0.91)         | 0.83 (0.78—0.89)    | 0.87 (0.81—0.92)    | 0.256    |
| Outcomes at follow-up: N/total (%) |                        |                        |                        |          |                          |                     |                     |          |
| NGT                                | 757 (47.85%)           | 203 (41.01%)           | 554 (50.97%)           | —        | 215 (70.96%)             | 103 (66.88%)        | 112 (75.17%)        | —        |
| Isolated IFG                       | 131 (8.28%)            | 51 (10.30%)            | 80 (7.34%)             | —        | 28 (9.24%)               | 12 (7.79%)          | 16 (10.74%)         | —        |
| Isolated IGT                       | 304 (19.22%)           | 103 (20.81%)           | 201 (18.49%)           | —        | 38 (12.54%)              | 24 (15.58%)         | 14 (9.40%)          | —        |
| IFG+IGT                            | 137 (8.66%)            | 46 (9.29%)             | 91 (8.37%)             | —        | 15 (4.95%)               | 11 (7.14%)          | 4 (2.68%)           | —        |

|      |              |             |              |   |           |           |           |   |
|------|--------------|-------------|--------------|---|-----------|-----------|-----------|---|
| NDDM | 253 (15.99%) | 92 (18.59%) | 161 (14.81%) | — | 7 (2.31%) | 4 (2.61%) | 3 (2.01%) | — |
|------|--------------|-------------|--------------|---|-----------|-----------|-----------|---|

SBP, systolic blood pressure; DBP, diastolic blood pressure; FPG, fasting plasma glucose; 2hPG, 2 hour plasma glucose (after oral glucose tolerance test); TG, triglyceride; TC, total cholesterol; HDL-c, high-density lipoprotein cholesterol; LDL-c, low-density lipoprotein cholesterol; WHtR, waist-to-height ratio; BMI, body mass index; WHR, waist-to-hip ratio; NGT, normal glucose tolerance; IFG, impaired fasting glucose; IGT, impaired glucose tolerance; IFG+IGT, IFG combined with IGT; NDDM, newly-diagnosed diabetes mellitus.

Data are expressed as mean  $\pm$  SD, or median (interquartile range), or N (%).

Mann-Whitney U analysis was used for DBP and BMI in Luzhou, TG and HDL-c in Wenjiang; one-way ANOVA analysis was used for the rest measurements in two surveys.

*P* value of men versus women.
